# Supplementary material for: Iodine-mediated oxidative N–N coupling of secondary amines to hydrazines
Source: Royal Society of Chemistry journal article supplement (doi:10.1039/c9ob00279k), 2019-01-01

## **Iodine-Mediated Oxidative N–N Coupling of Secondary Amines to Hydrazines**

Linning Ren, Manman Wang, Benyao Fang, Wenquan Yu,\* and Junbiao Chang\*

*College of Chemistry and Molecular Engineering, Zhengzhou University, Zhengzhou, Henan Province 450001, China*

1.  $^1\text{H}$  NMR and  $^{13}\text{C}$  NMR Spectra of Products **1**

S2

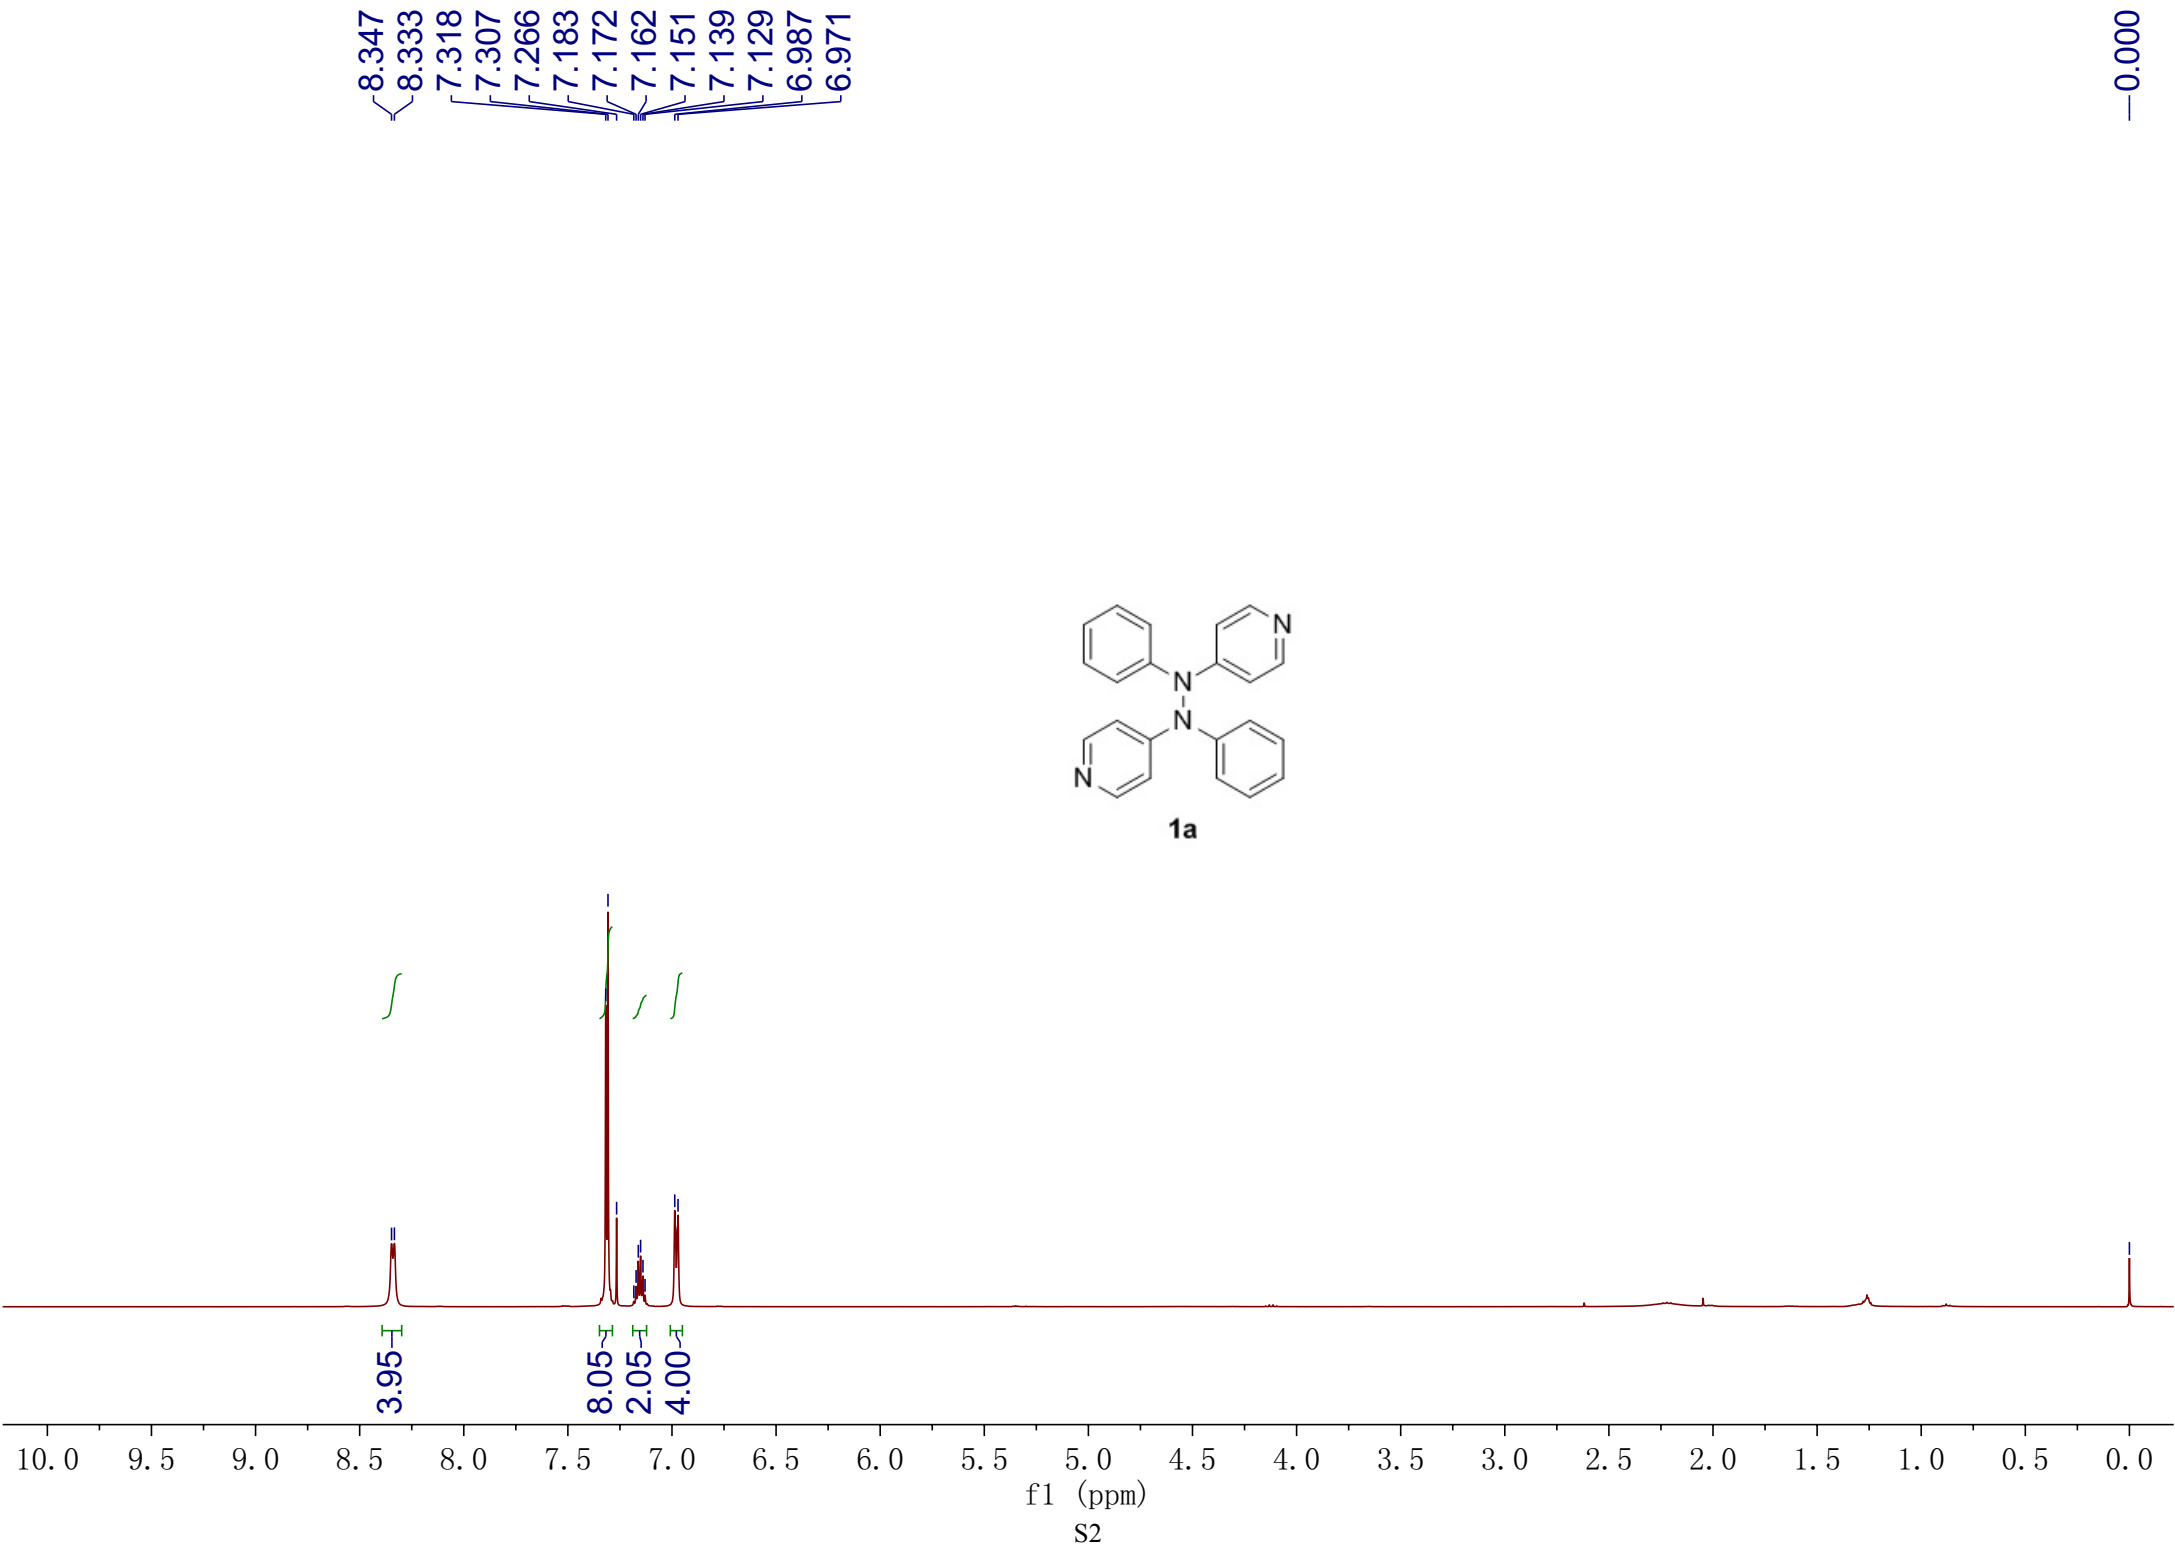

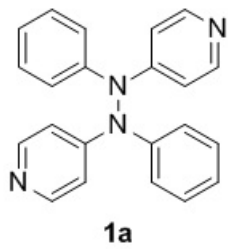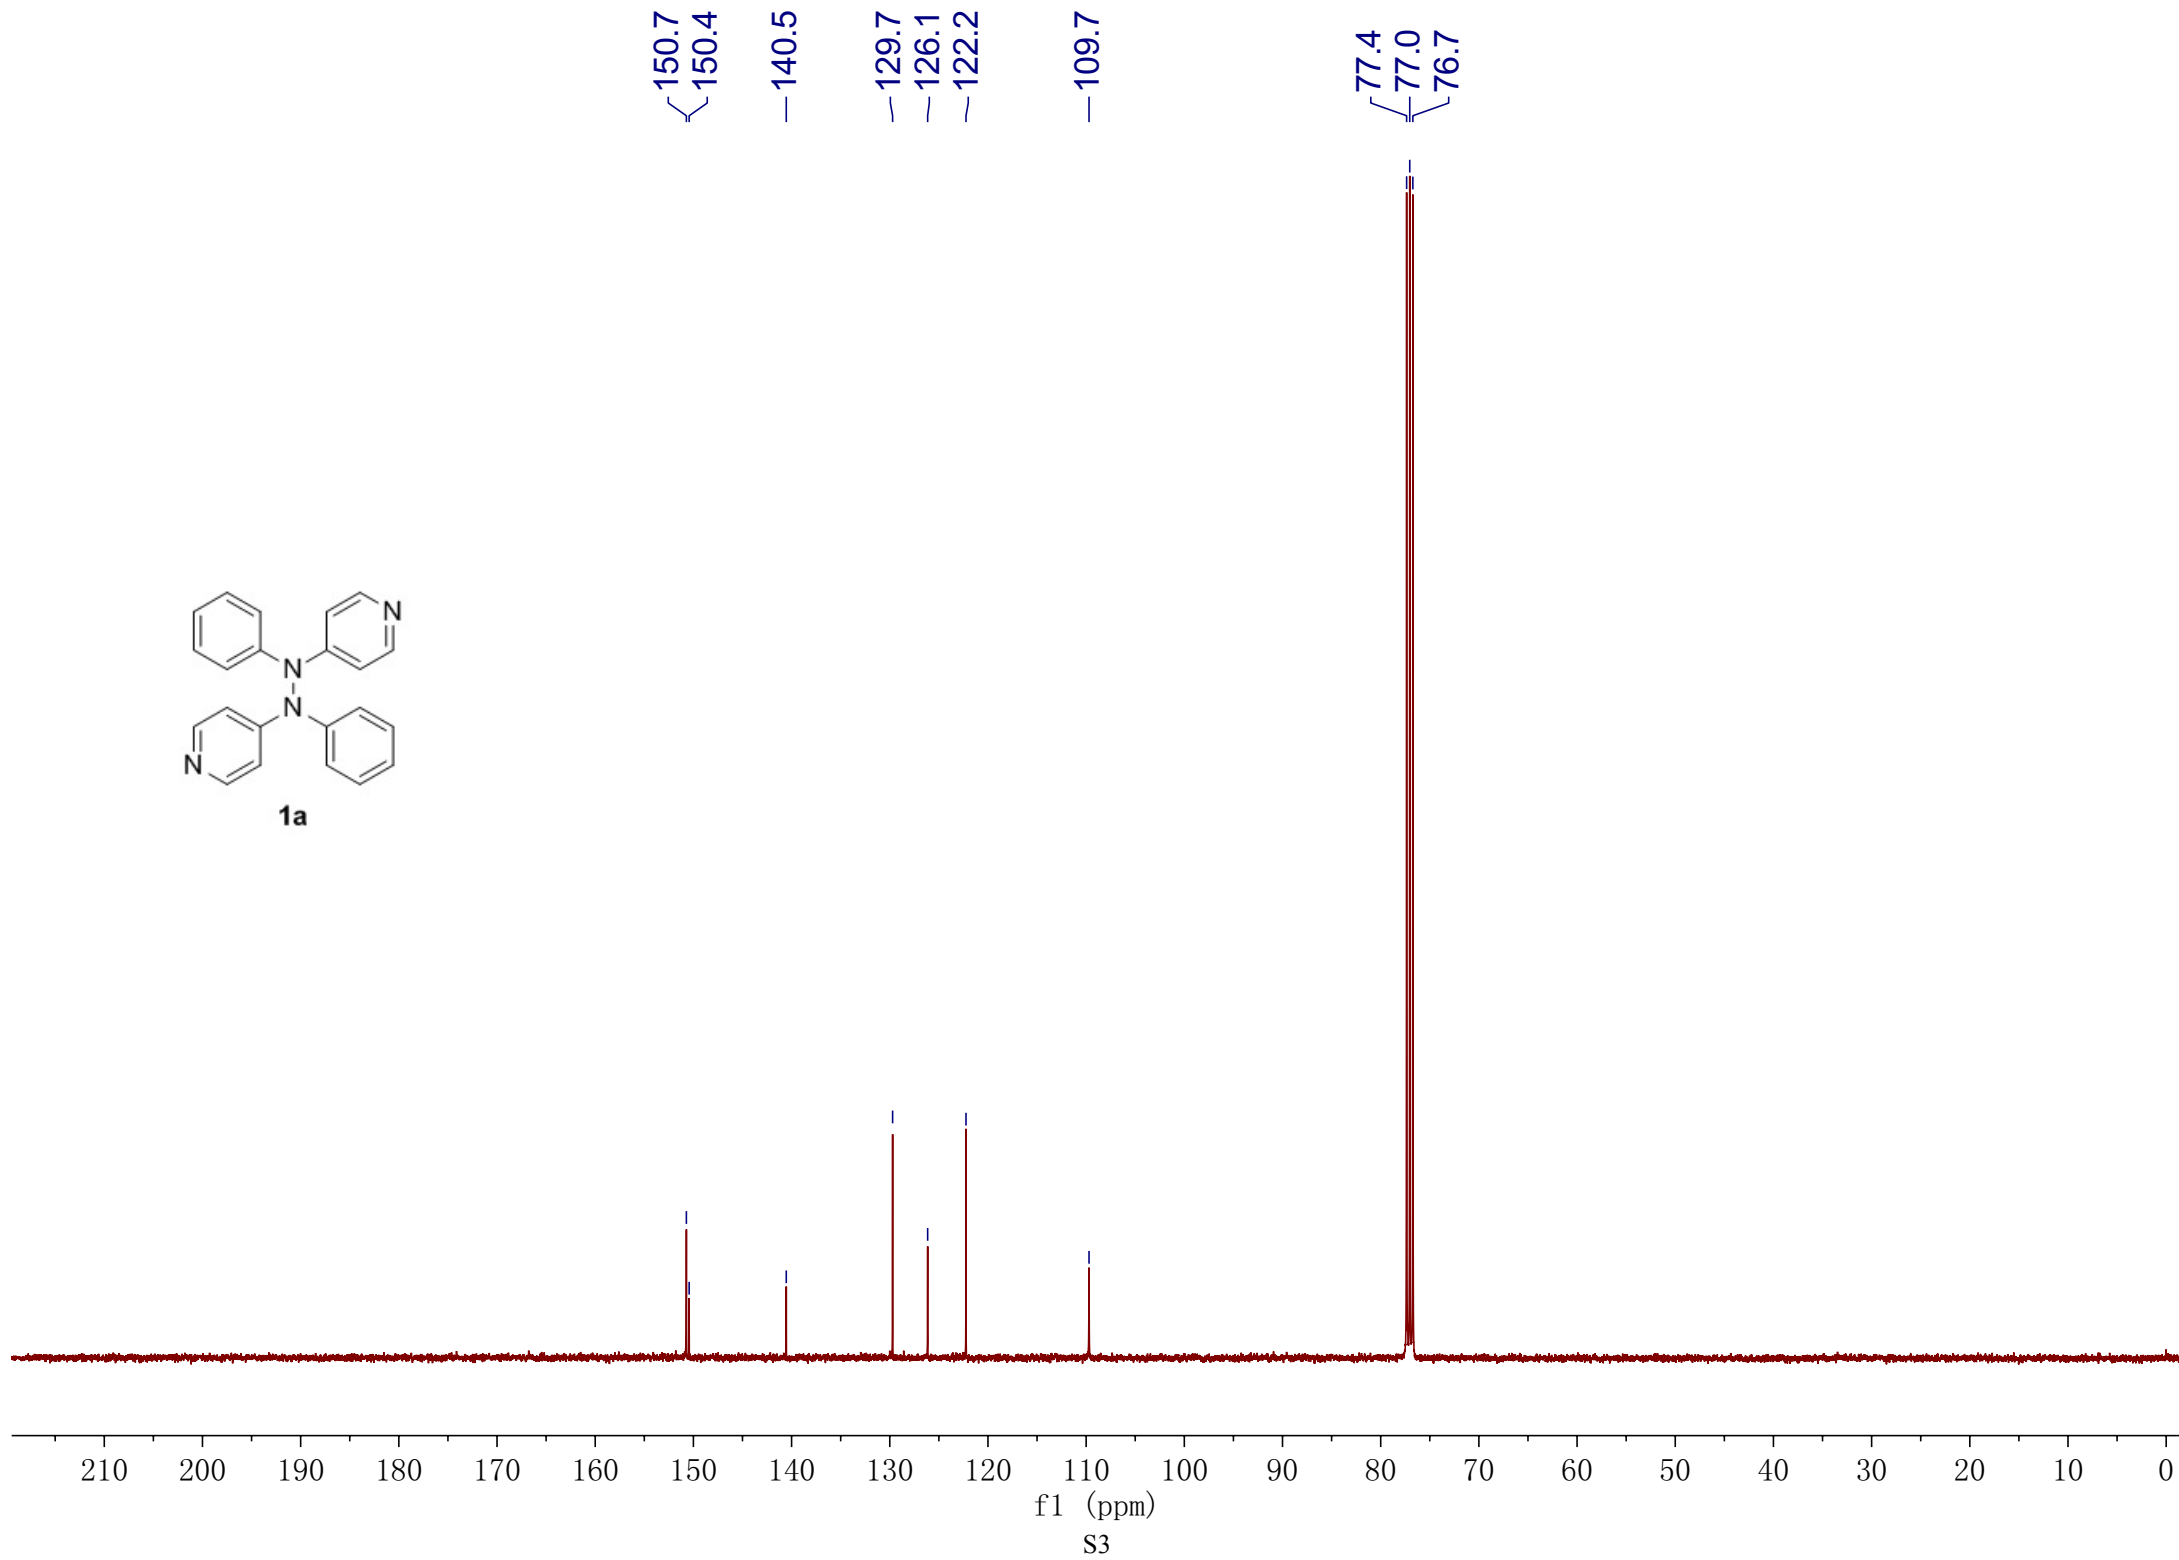

8.311  
8.296

7.266  
7.176  
7.155  
7.112  
7.091  
6.905  
6.889

-2.302

-0.000

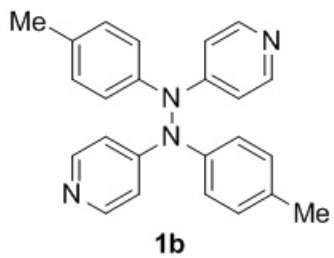

4.00

4.08

4.08

4.03

6.10

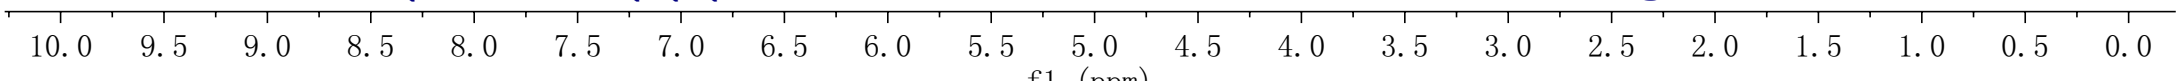

f1 (ppm)

S4

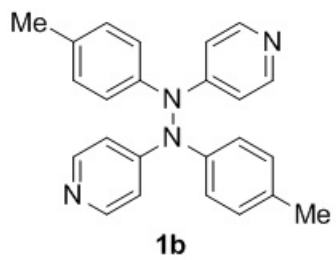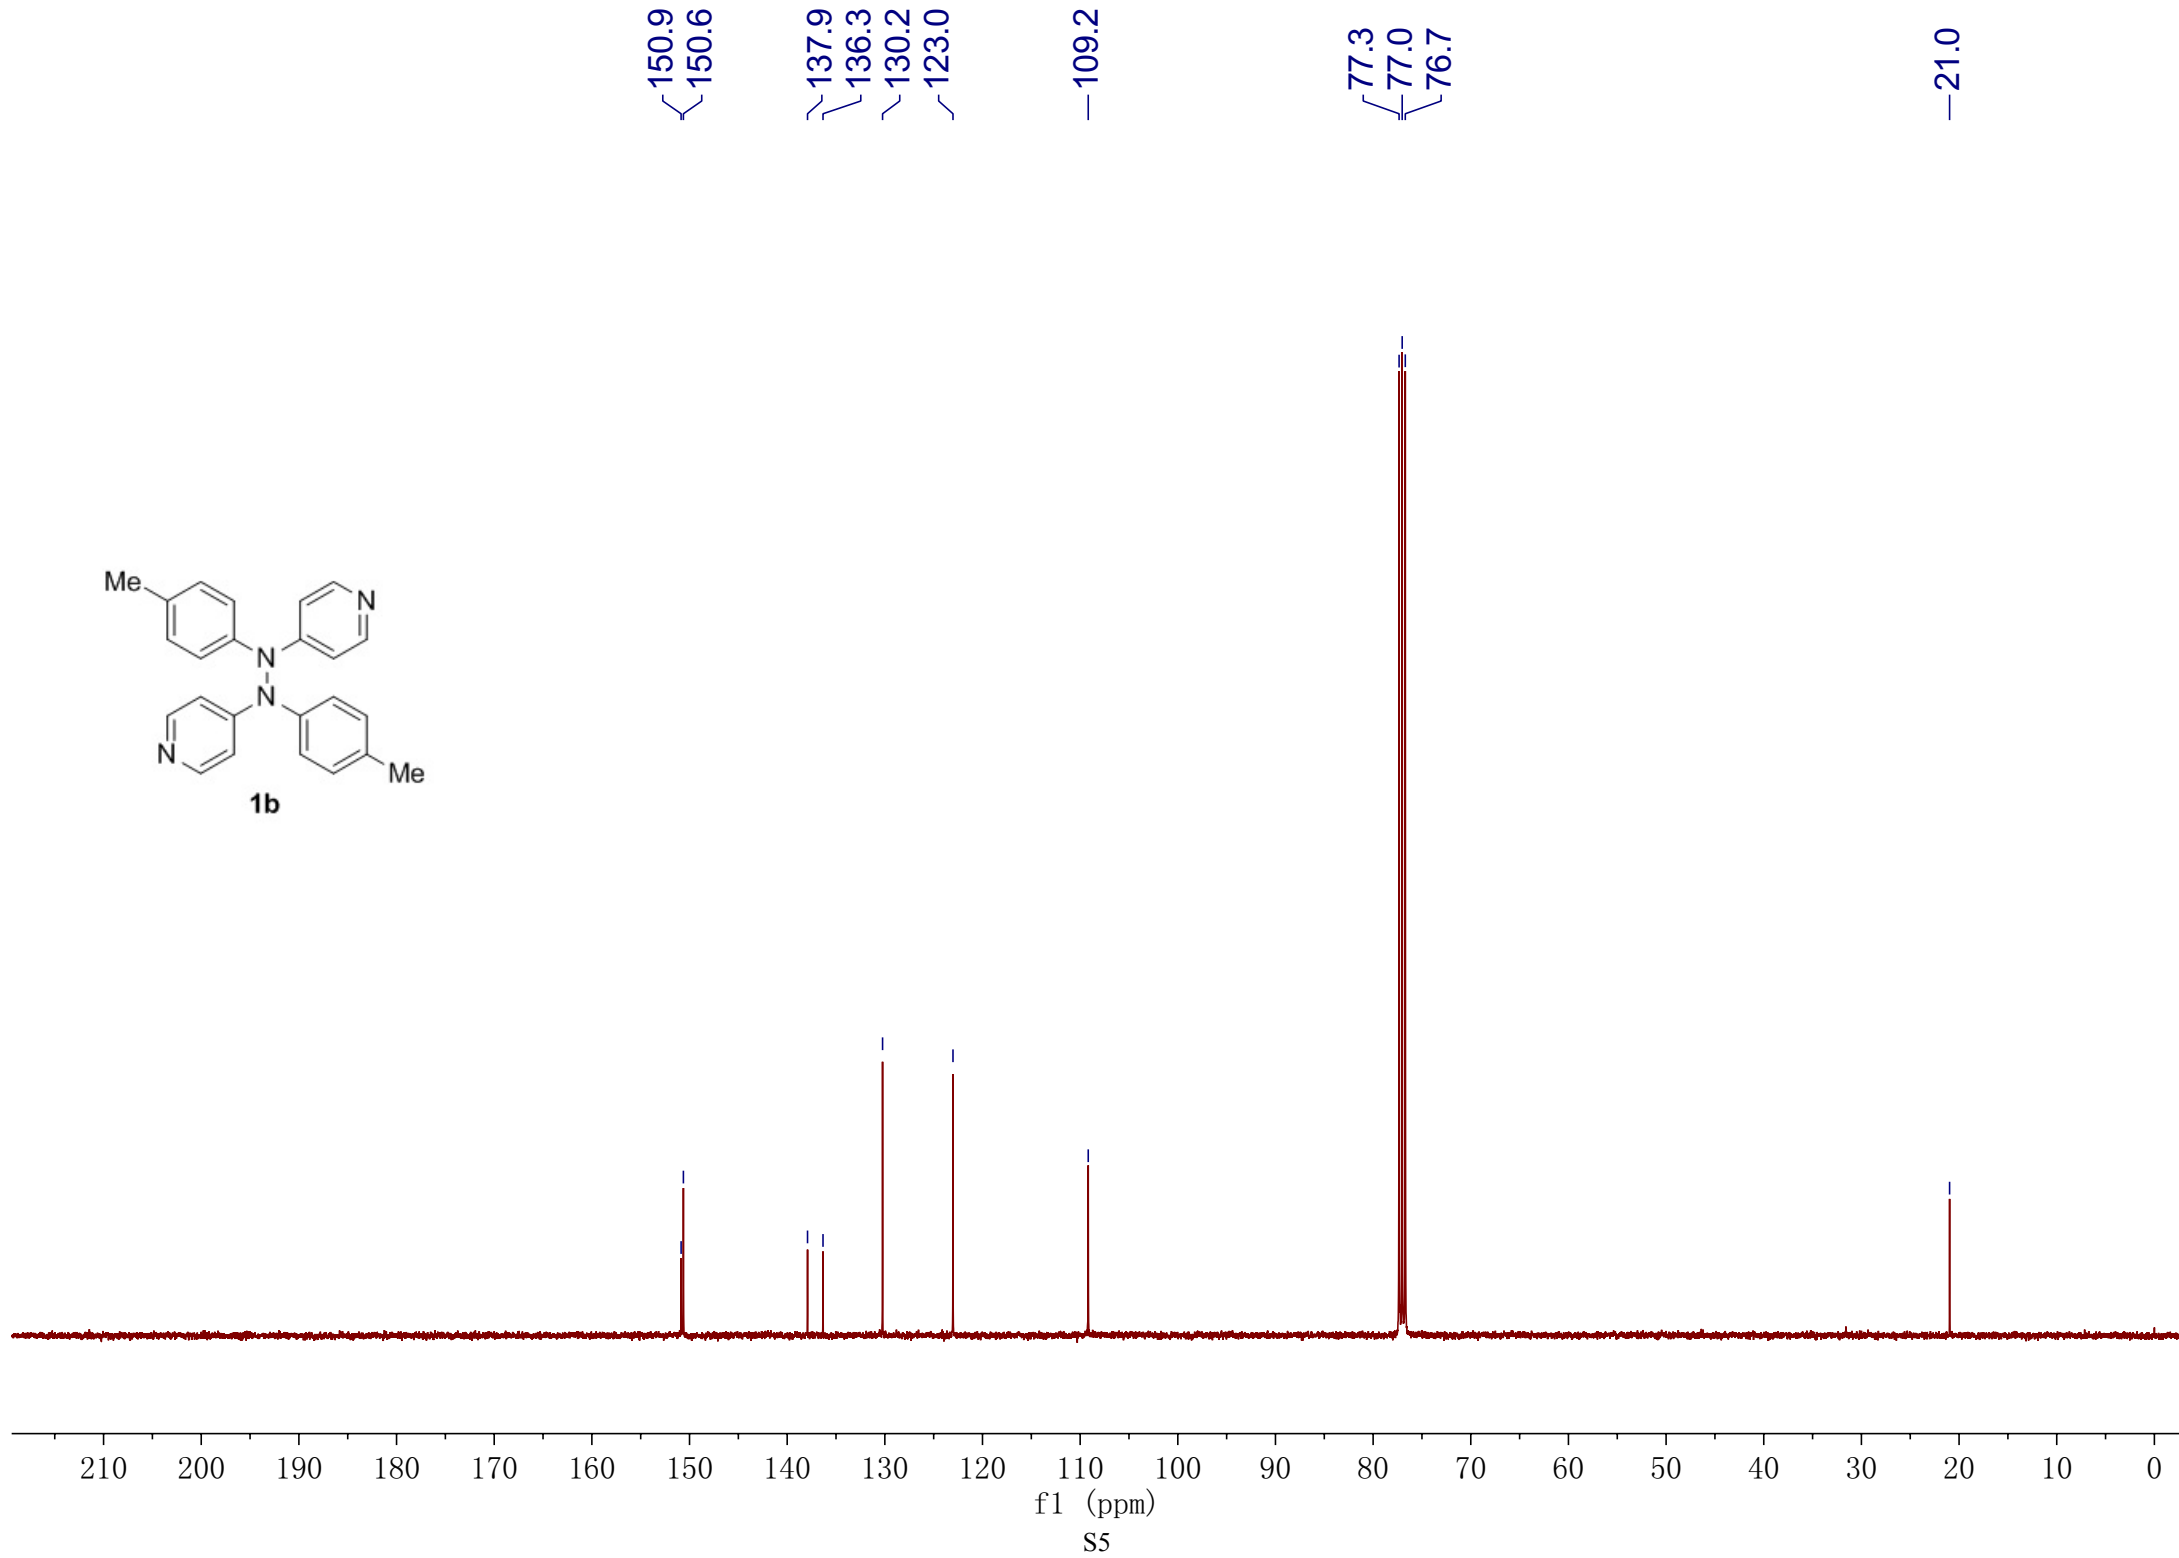

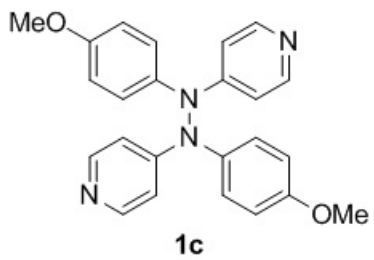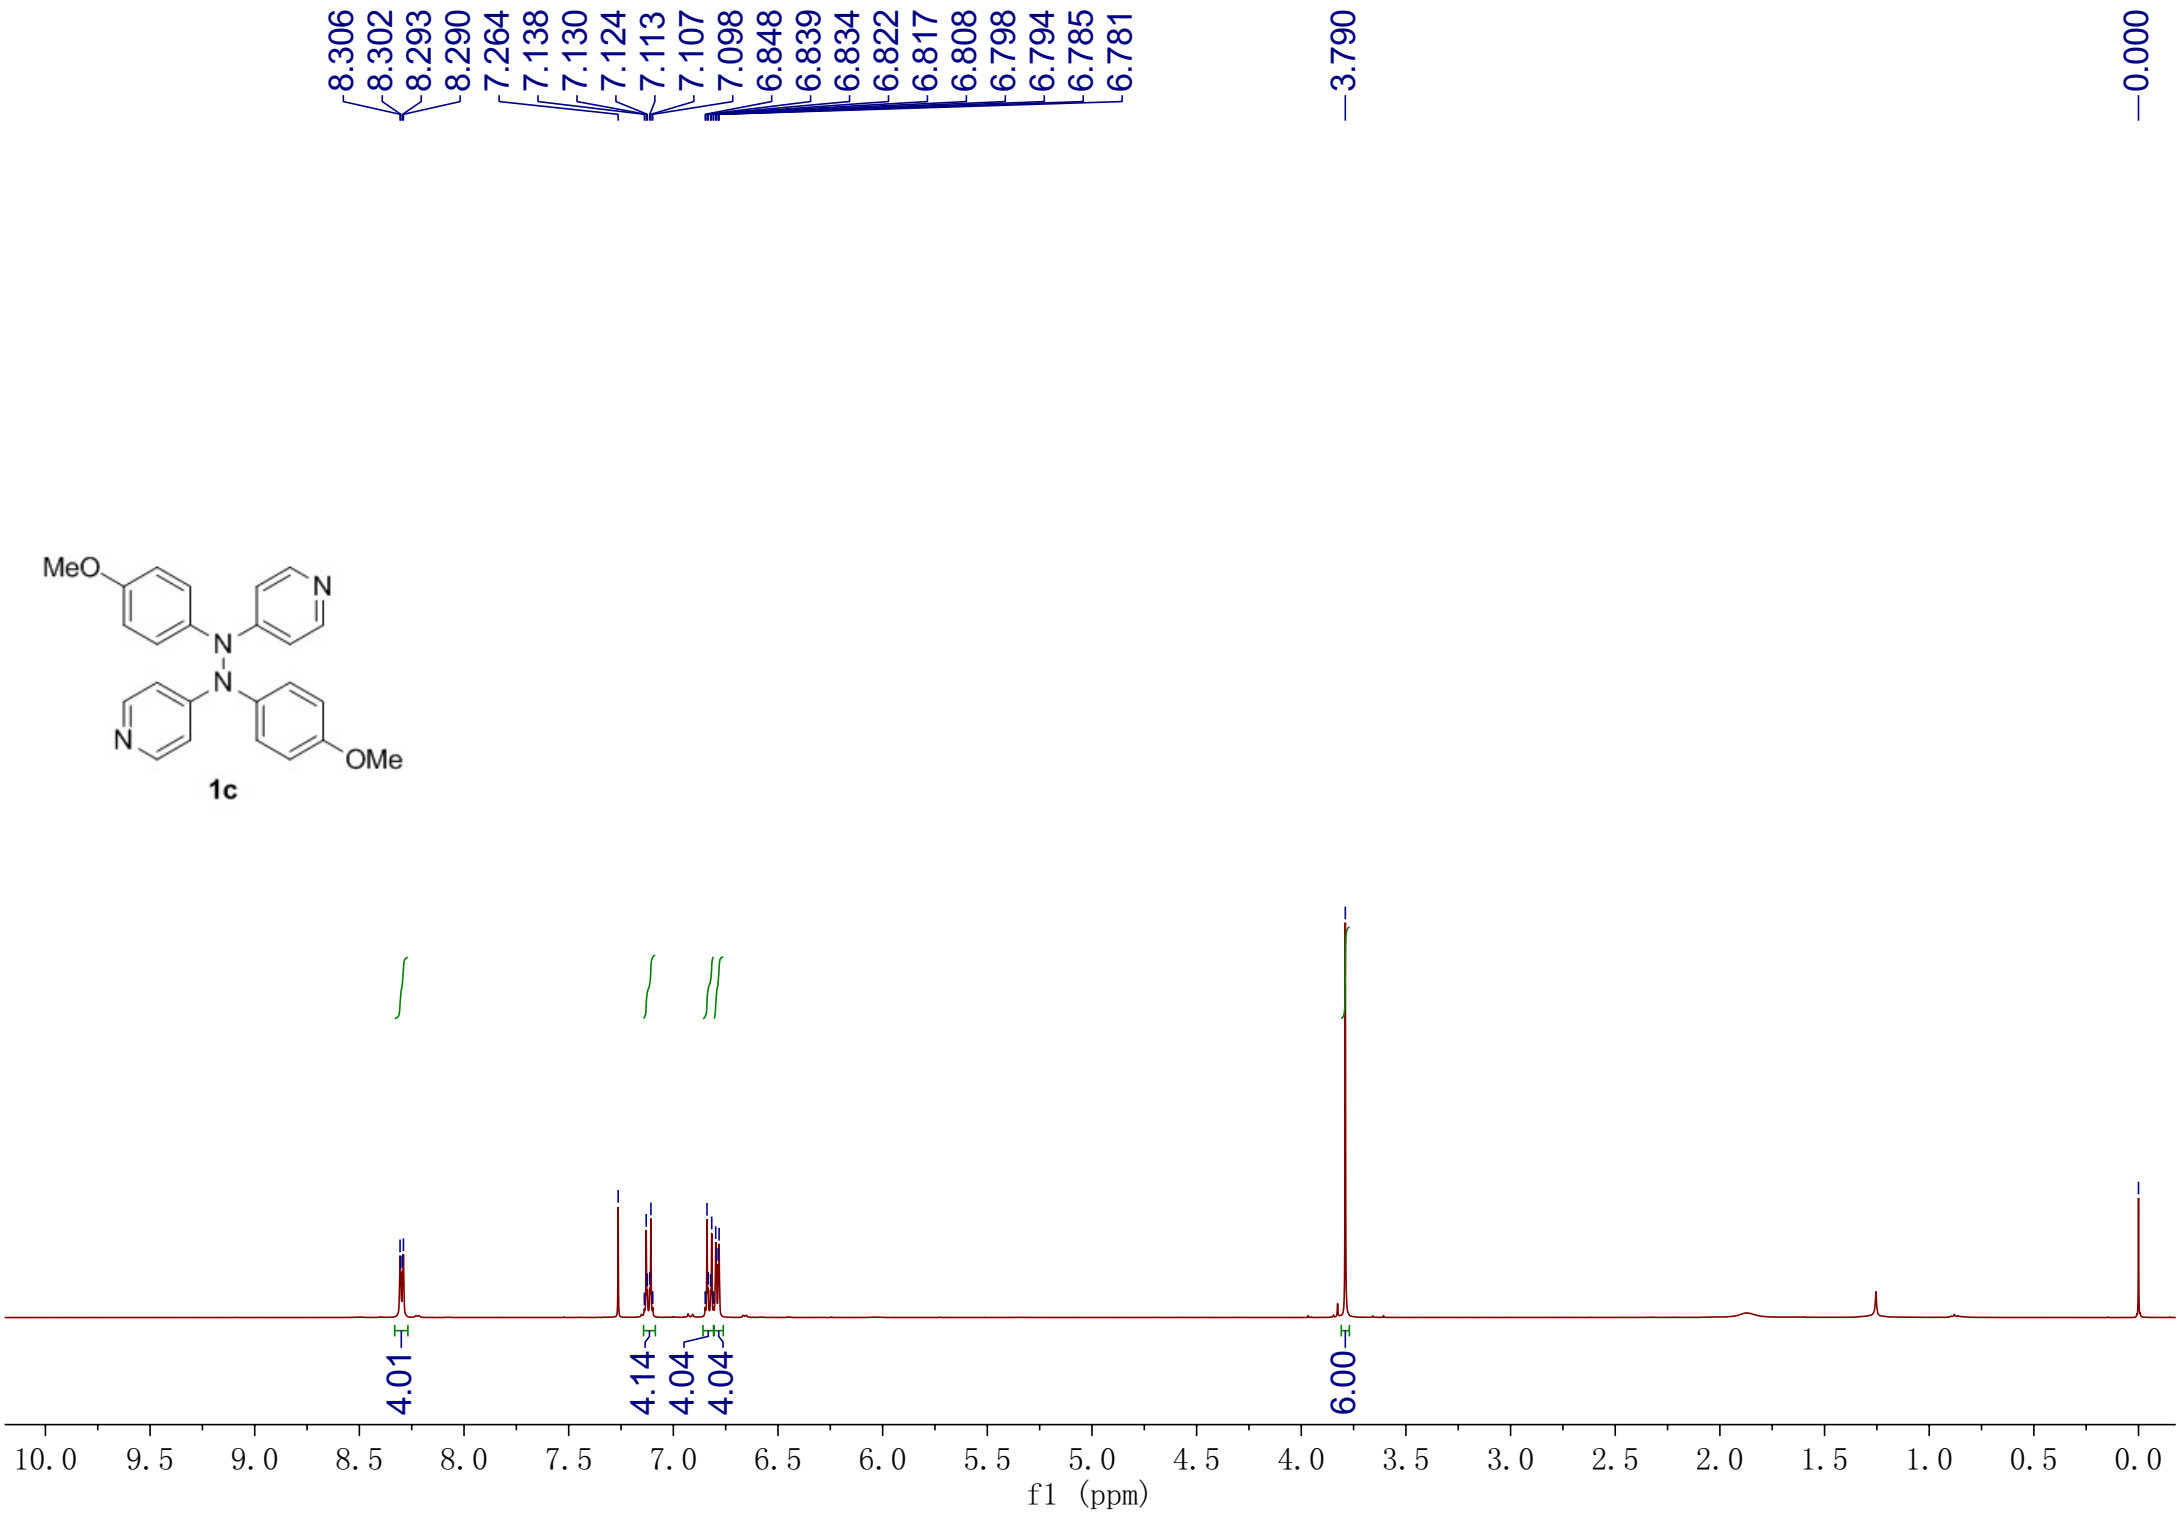

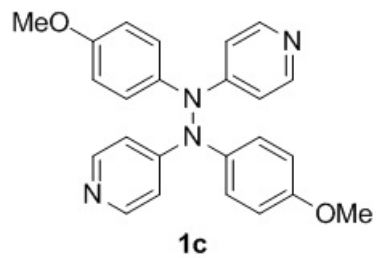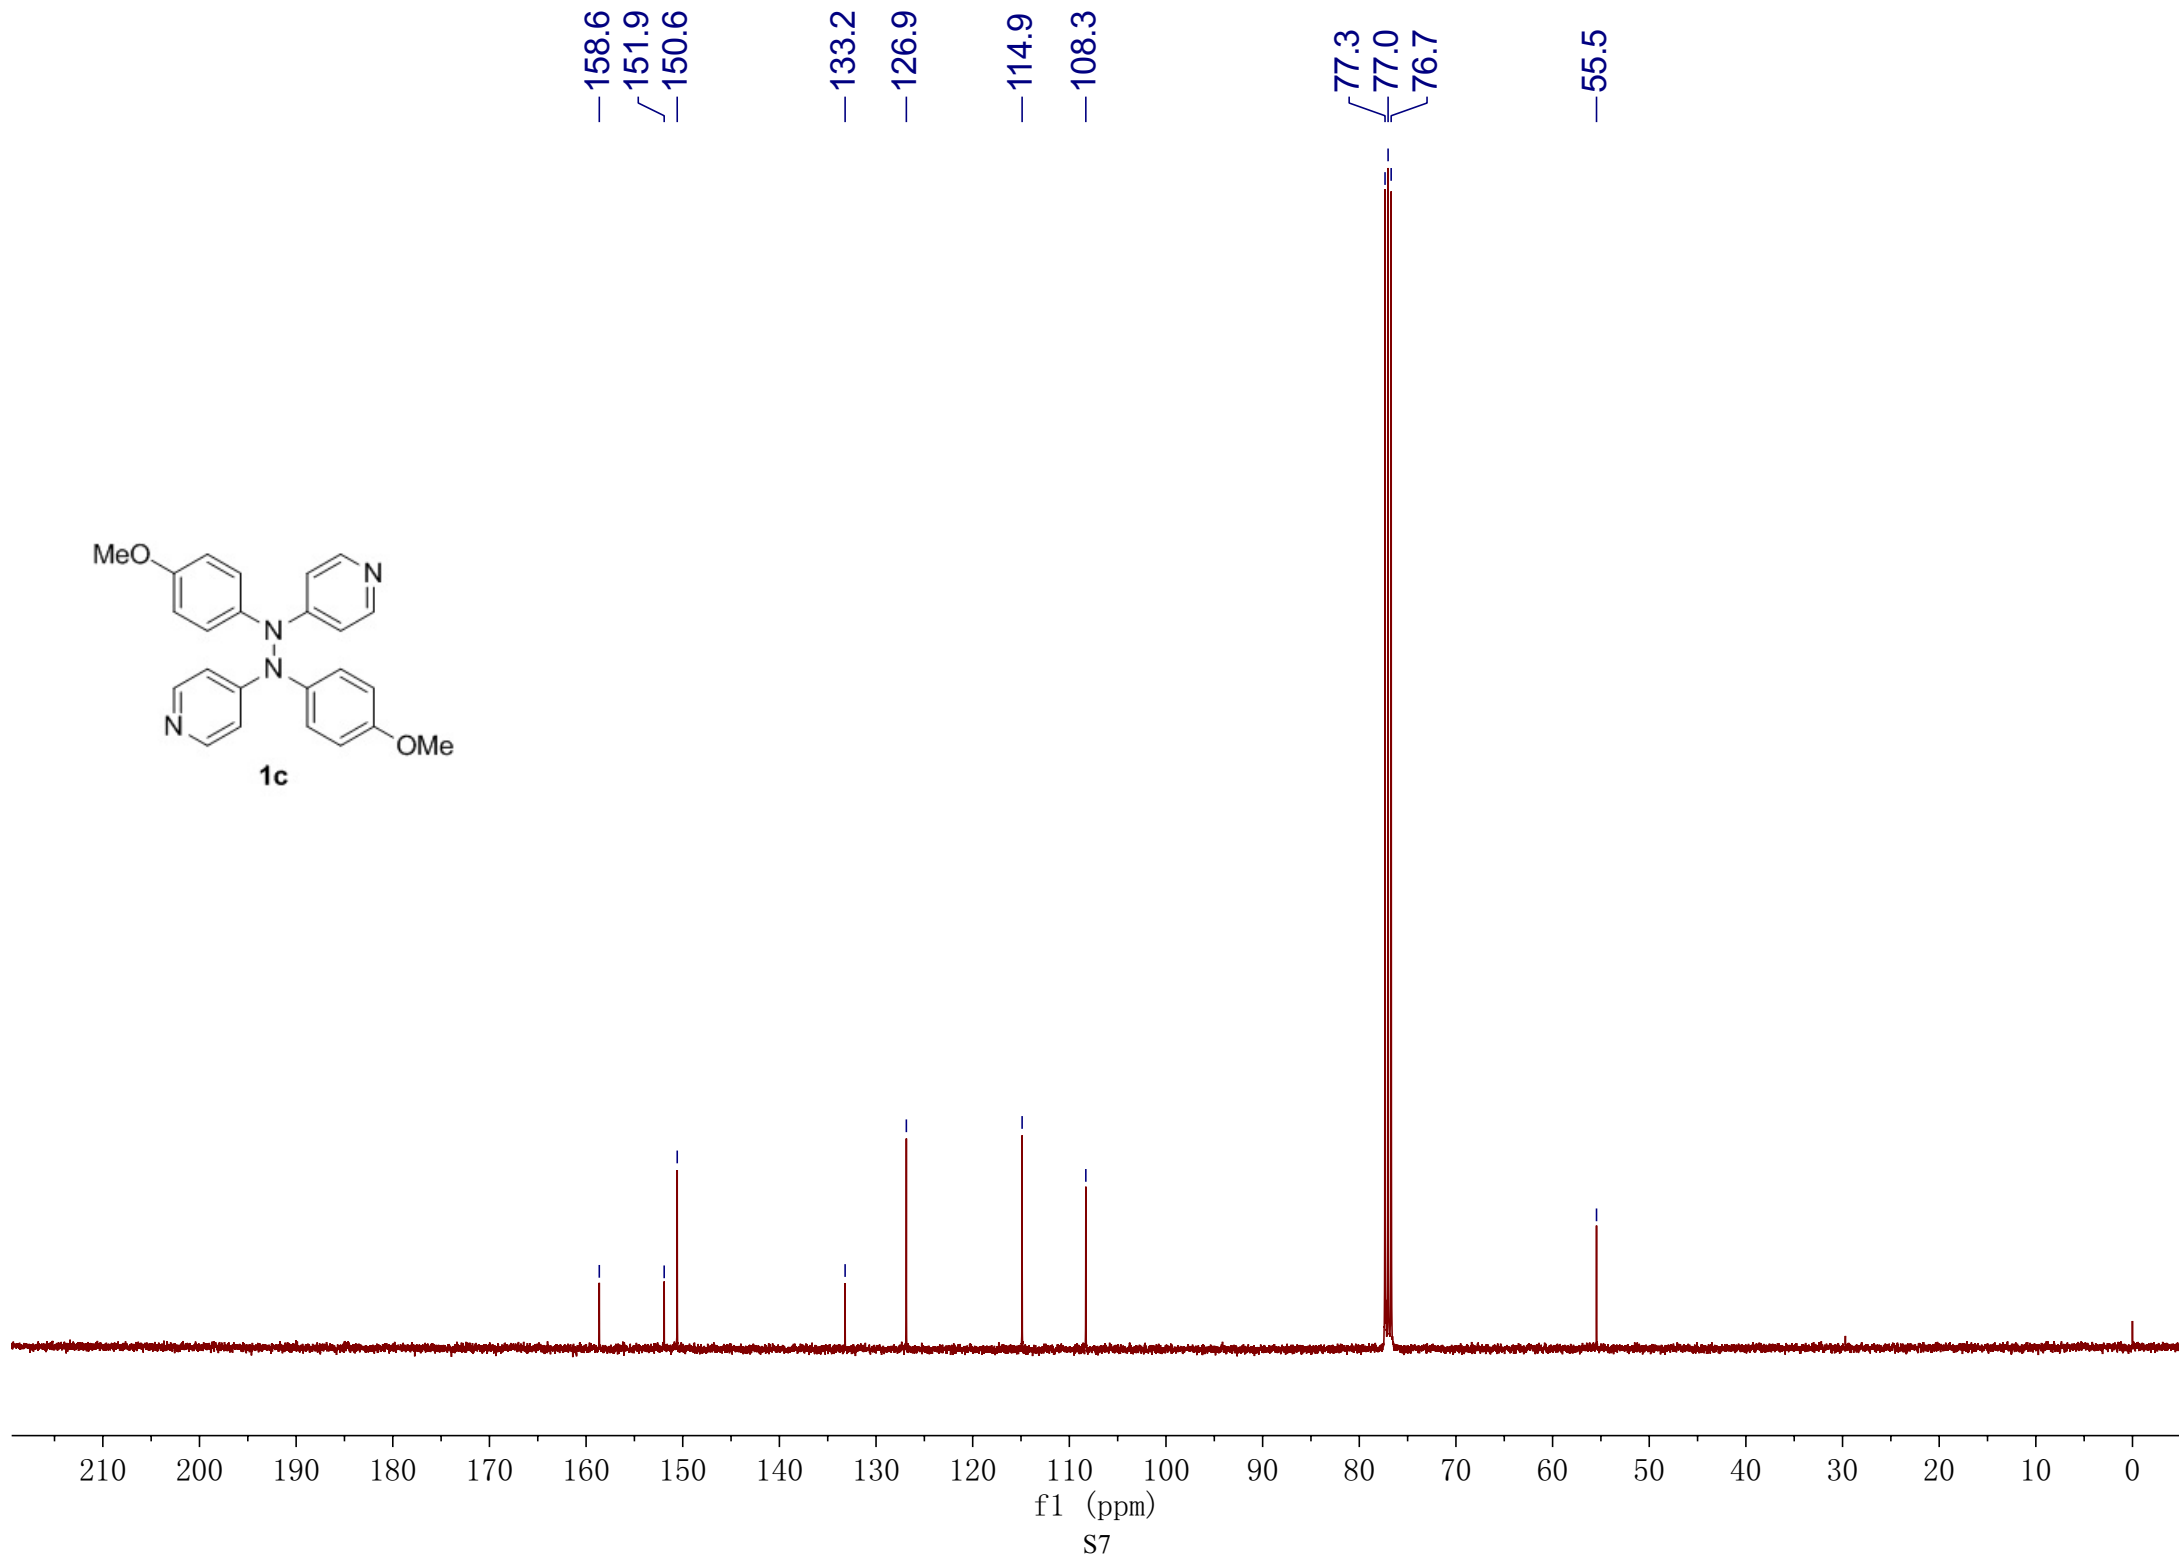

8.355  
8.340  
7.278  
7.248  
7.237  
7.231  
7.226  
7.214  
7.046  
7.026  
7.004  
6.868  
6.852

0.000

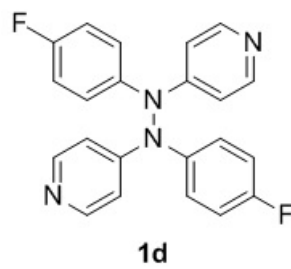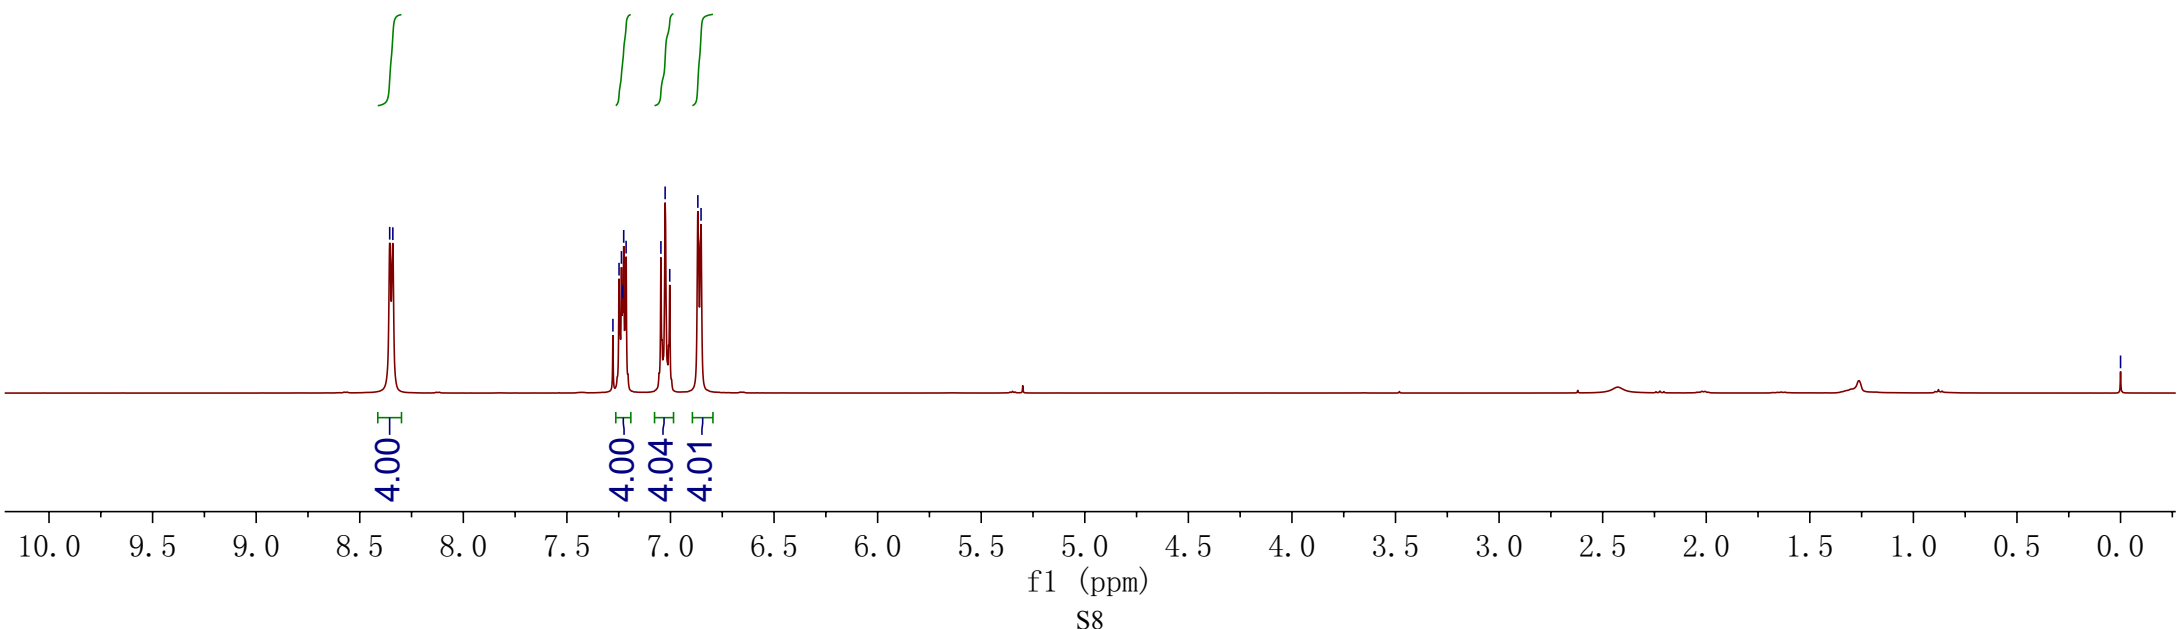



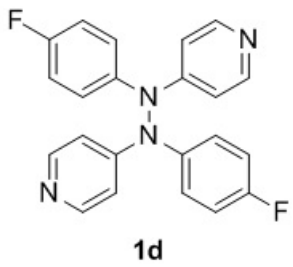

162.2  
159.7  
150.9  
150.8  
136.3  
136.3  
125.8  
125.7  
117.0  
116.7  
108.8  
77.4  
77.1  
76.7

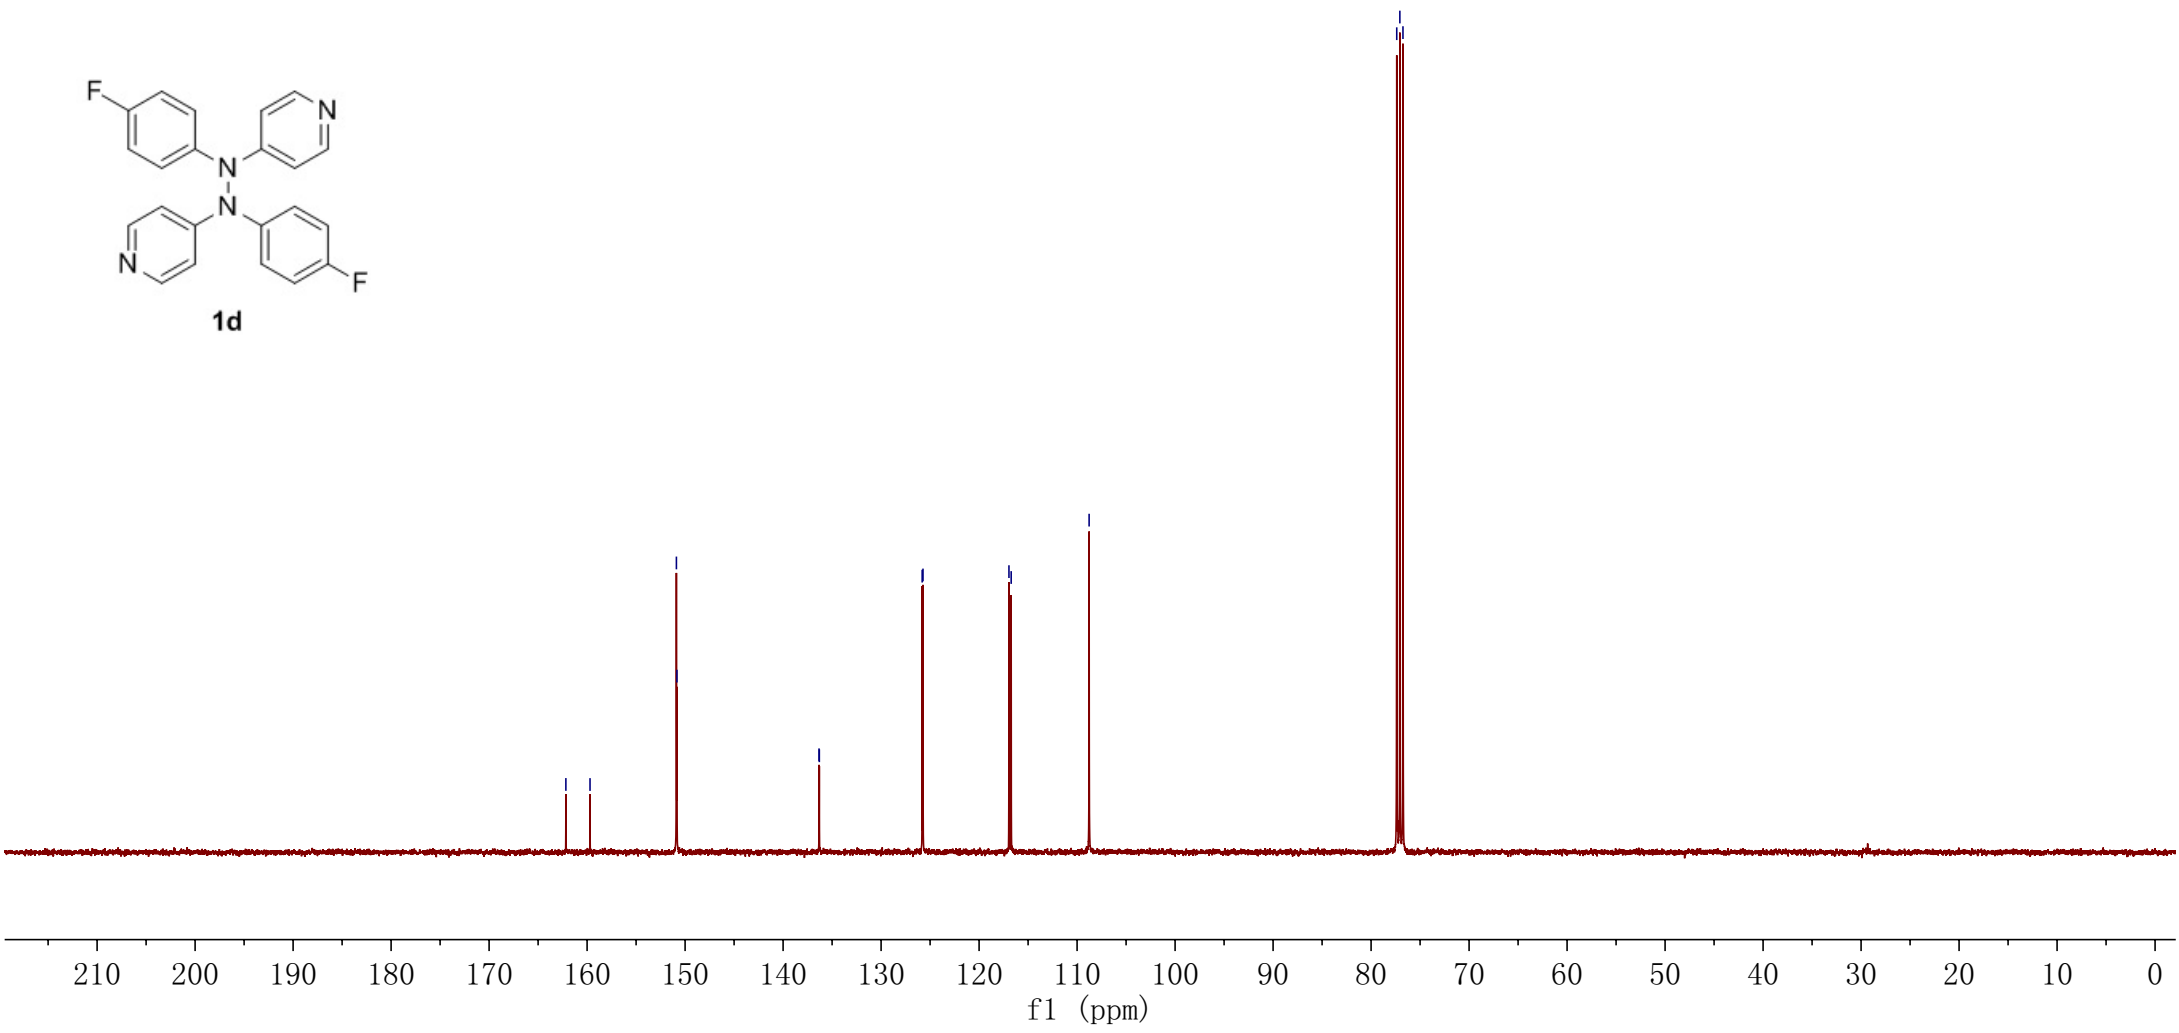

8.377  
8.361  
7.451  
7.443  
7.438  
7.426  
7.421  
7.414  
7.266  
7.193  
7.185  
7.180  
7.168  
7.163  
7.155  
6.947  
6.943  
6.935  
6.931

-0.000

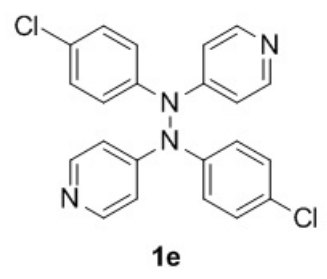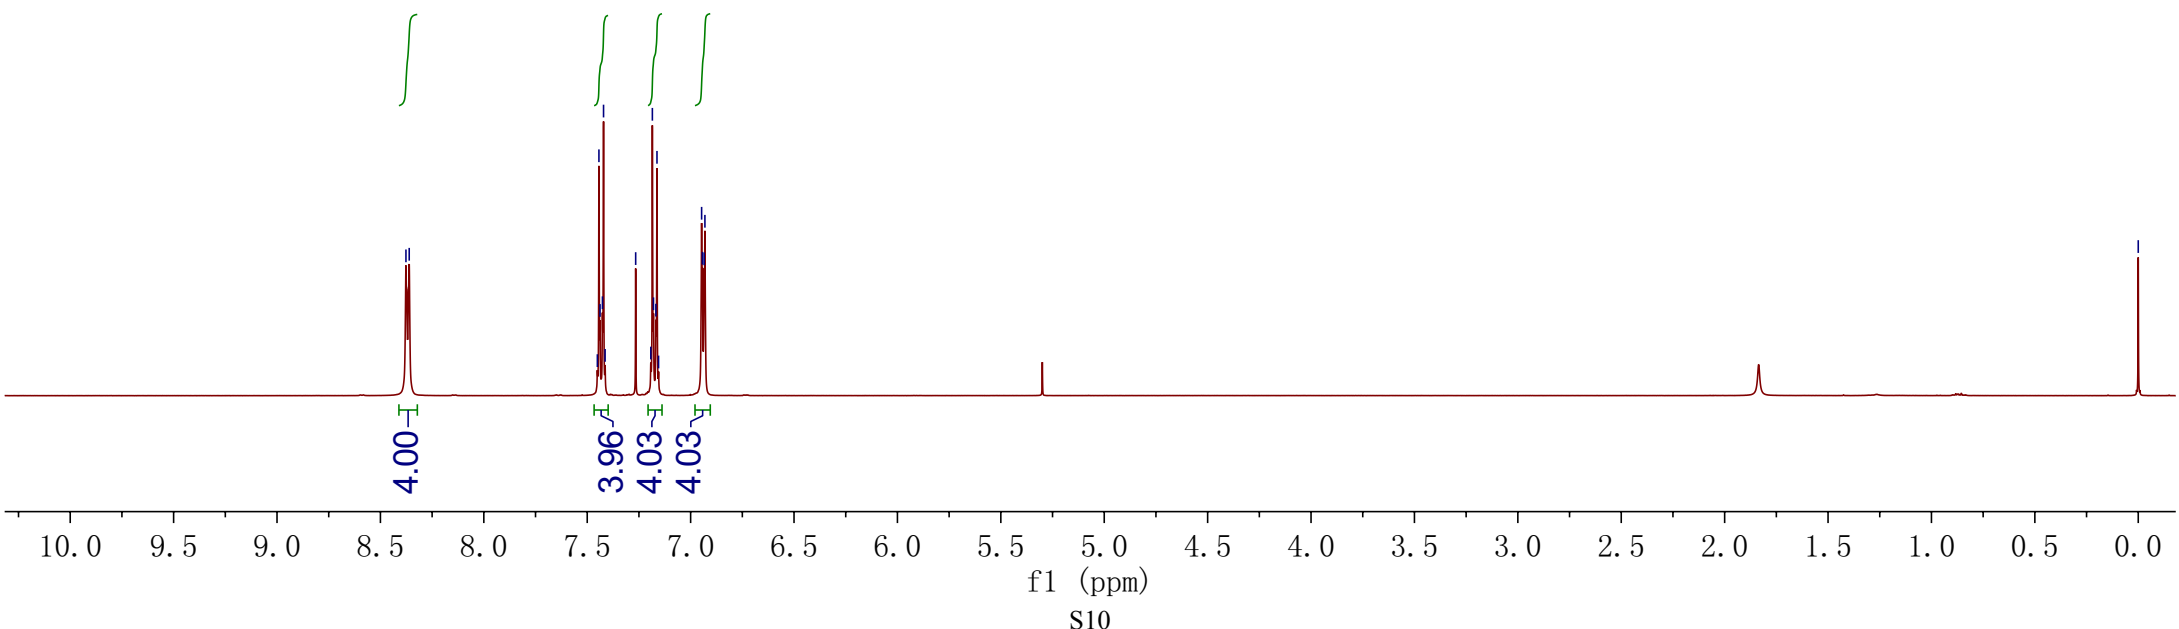

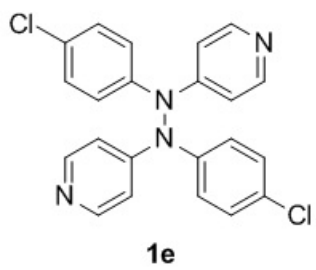

151.1  
149.6  
— 139.5  
— 132.9  
— 123.3  
— 118.9  
— 109.8  
77.3  
77.0  
76.7

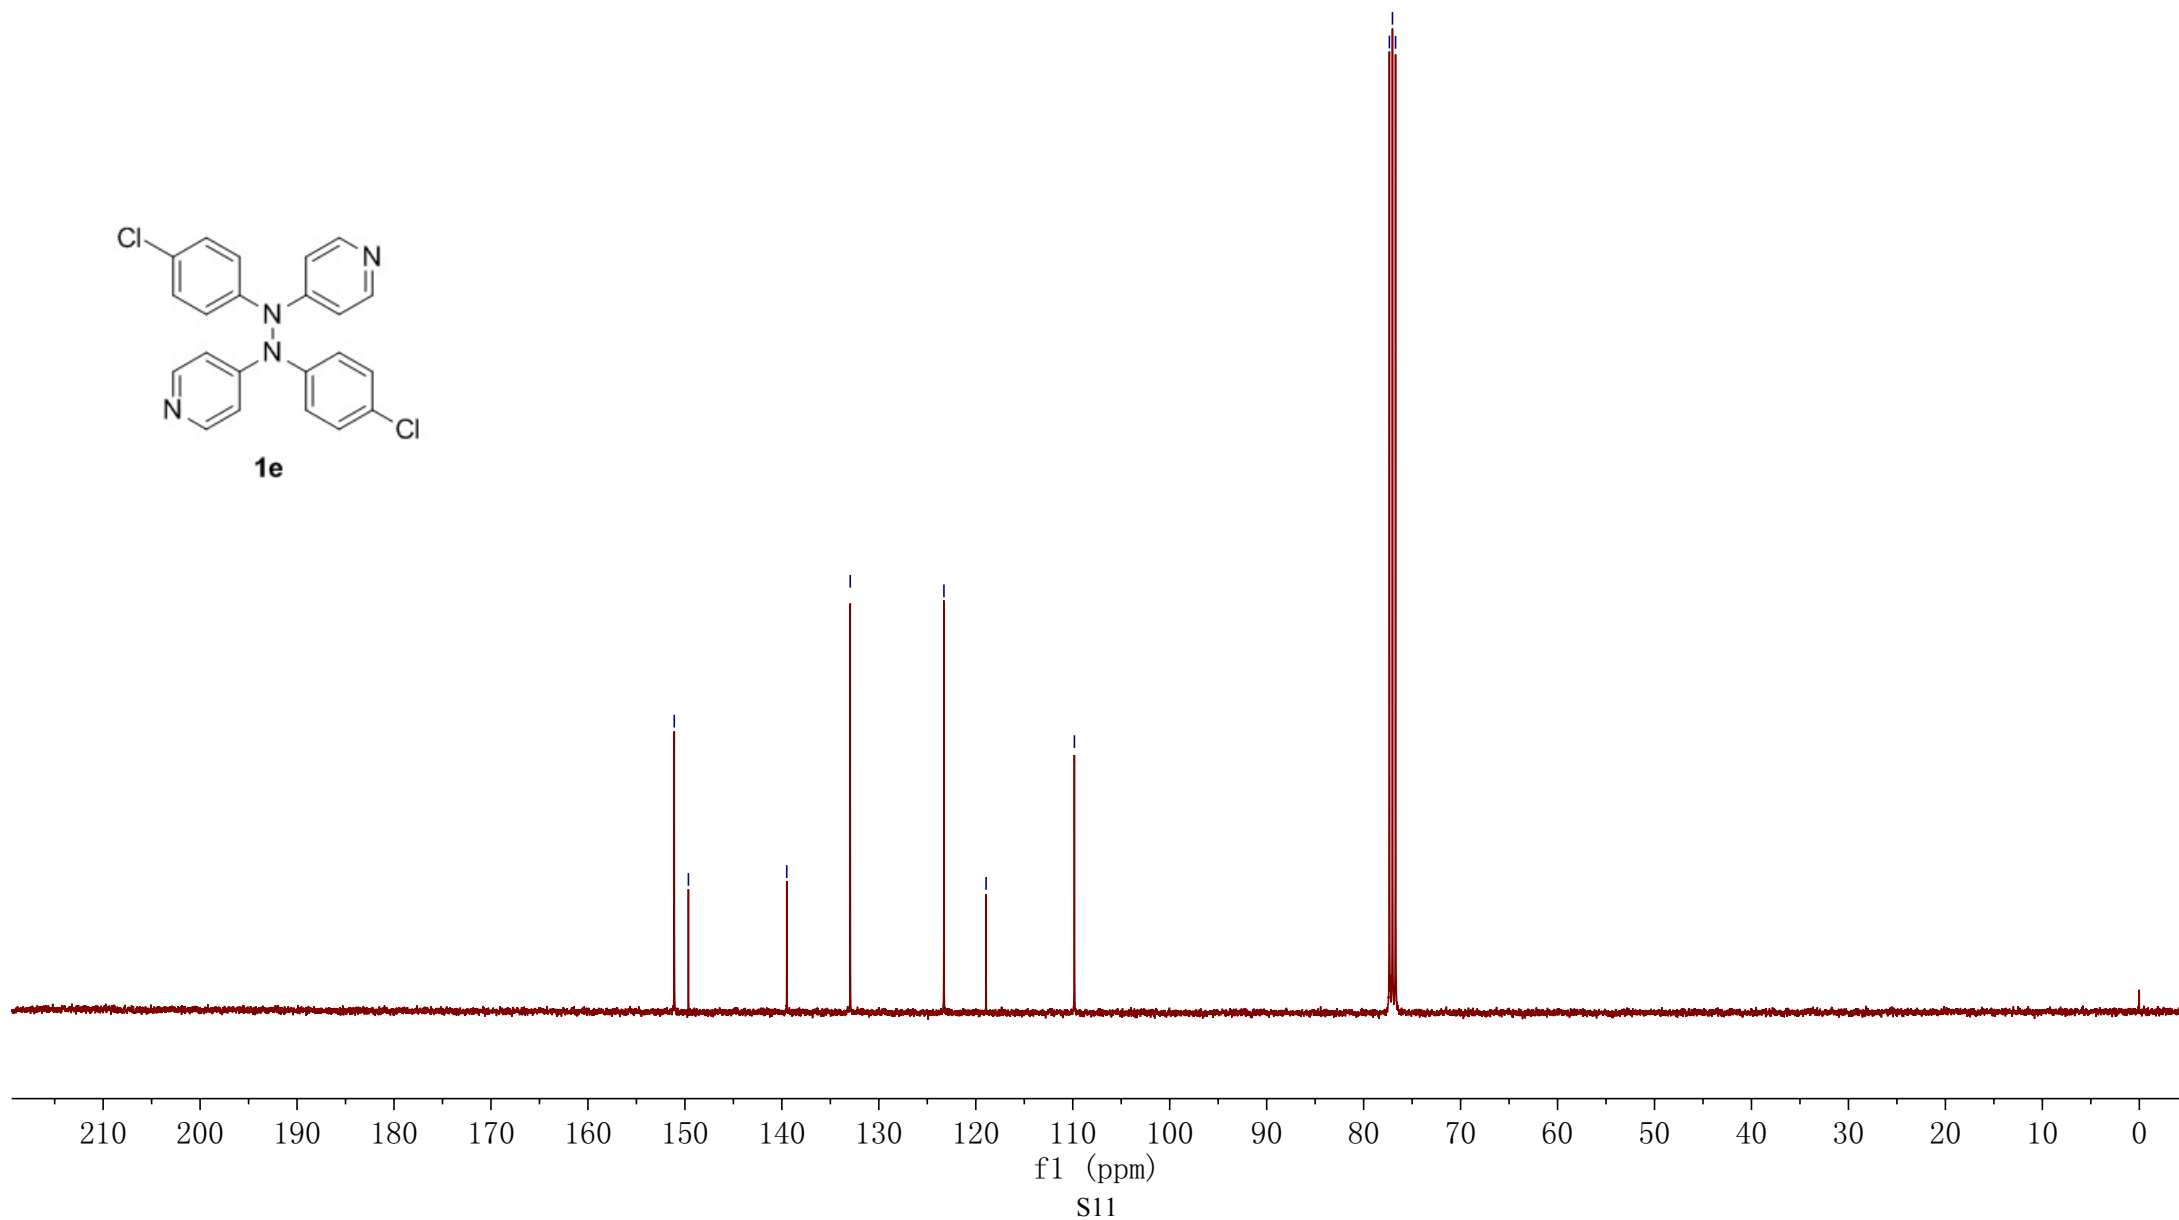

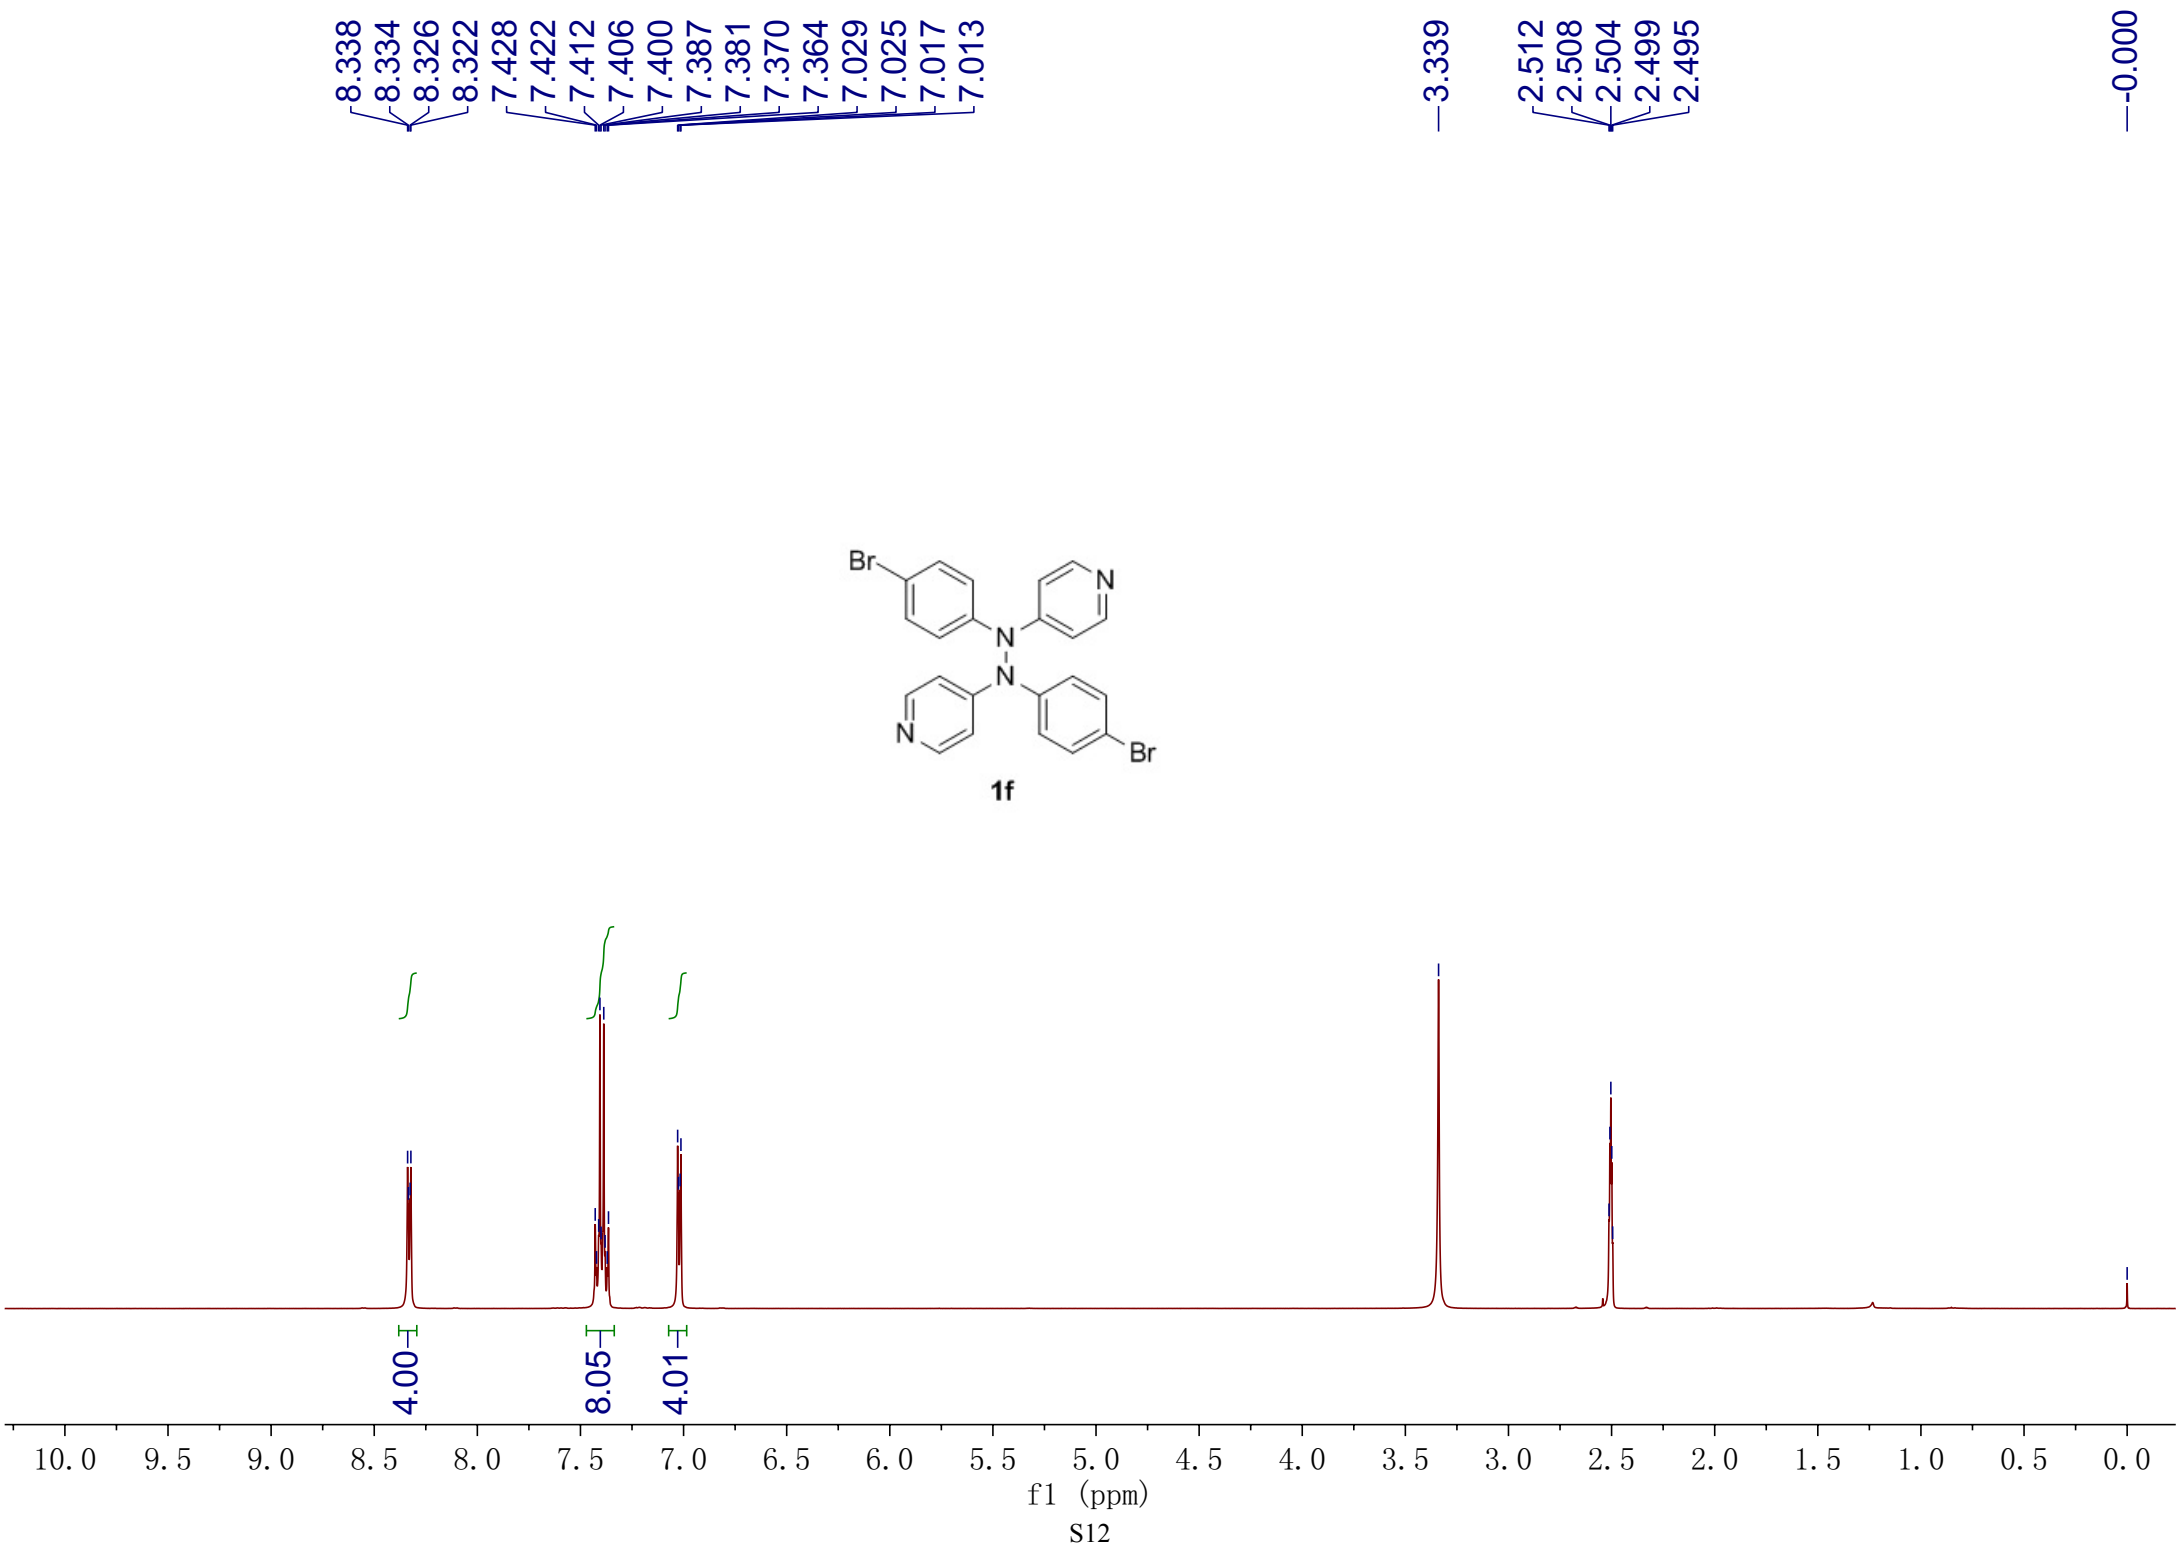

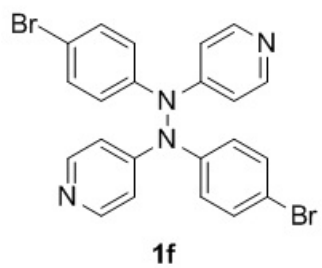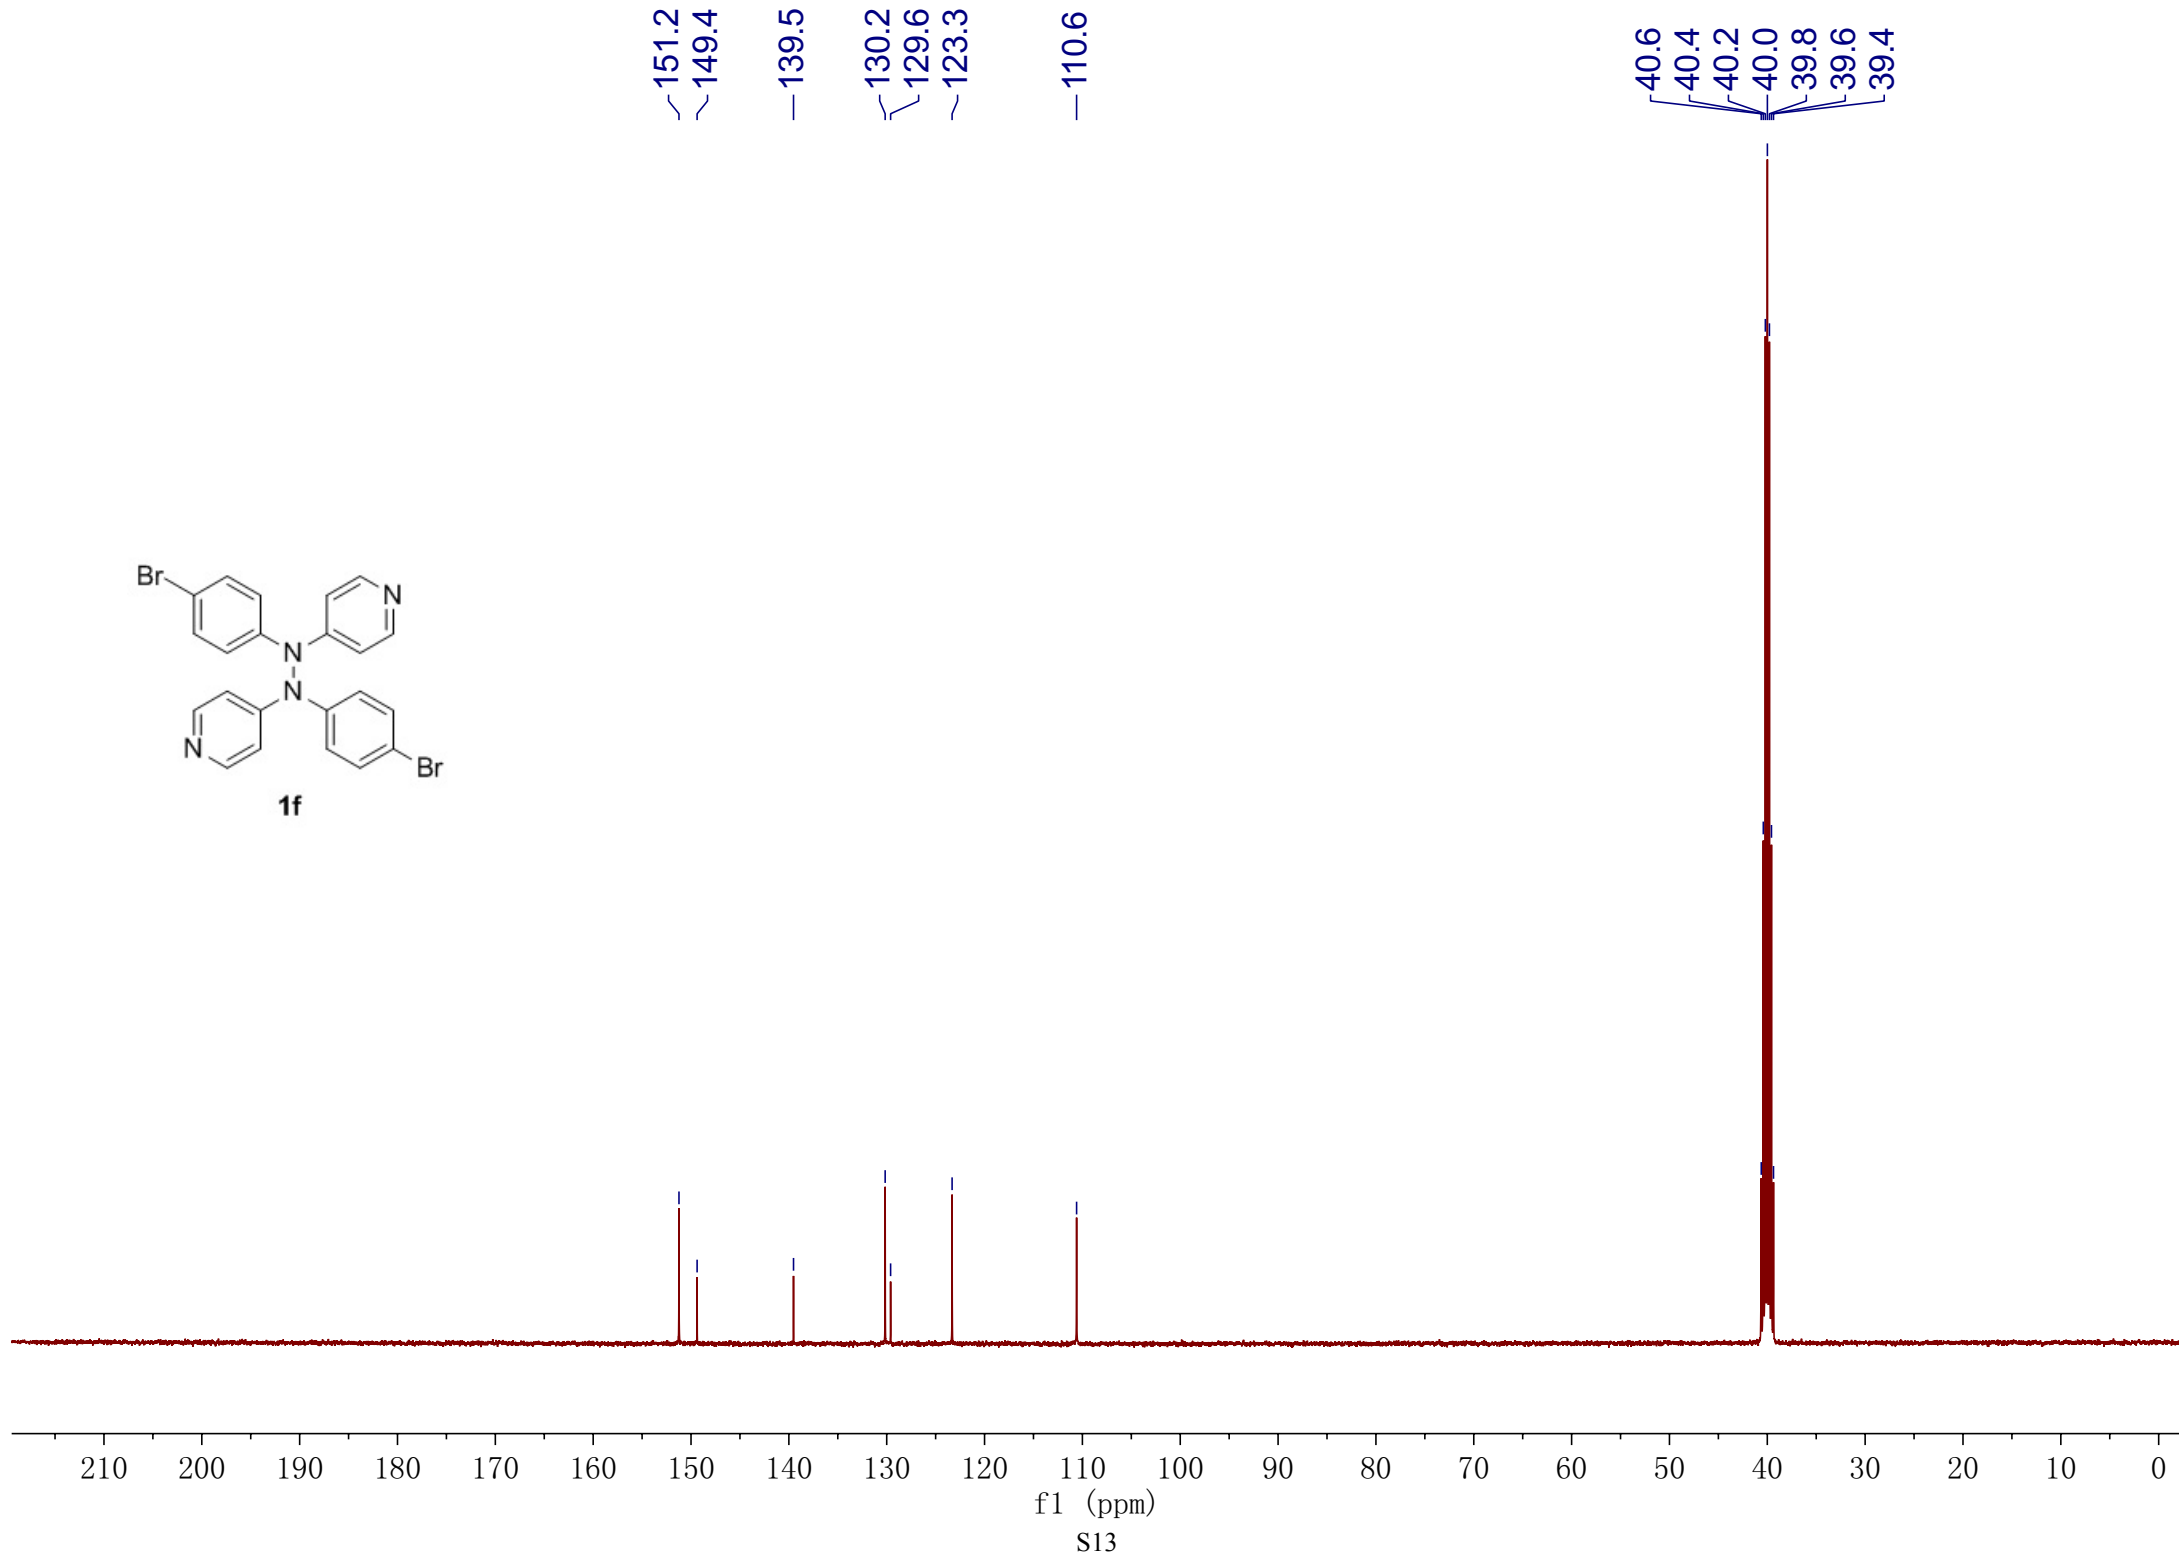

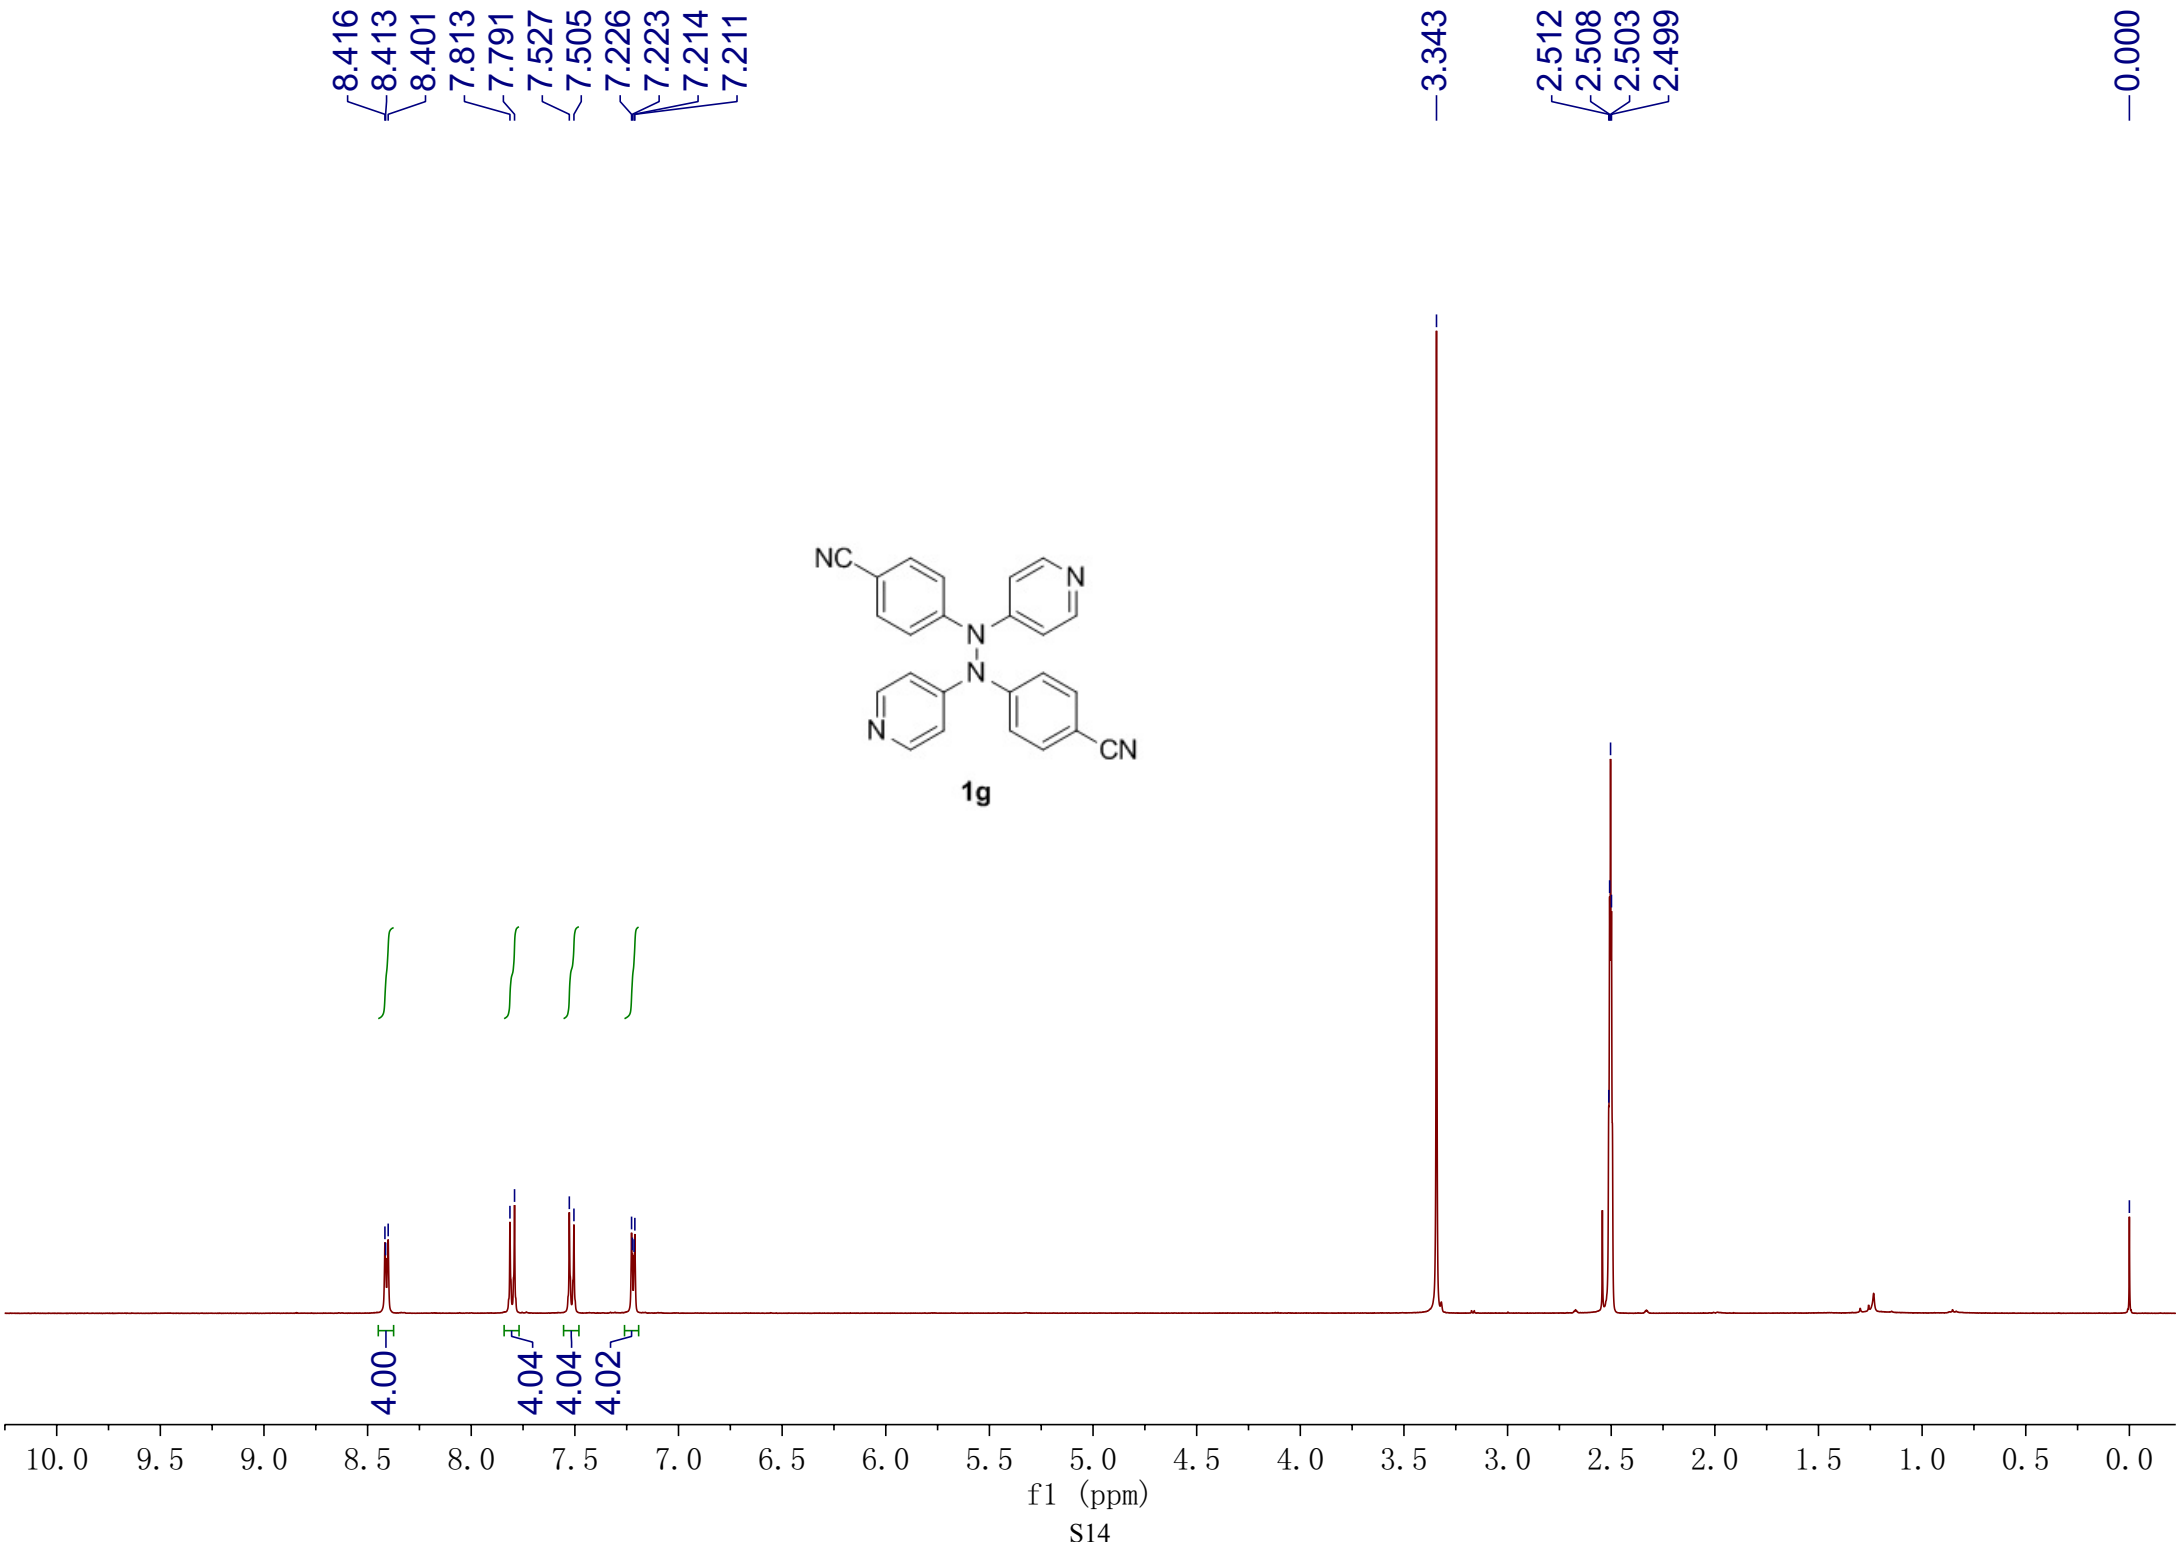

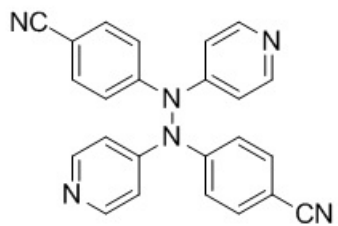

**1g**

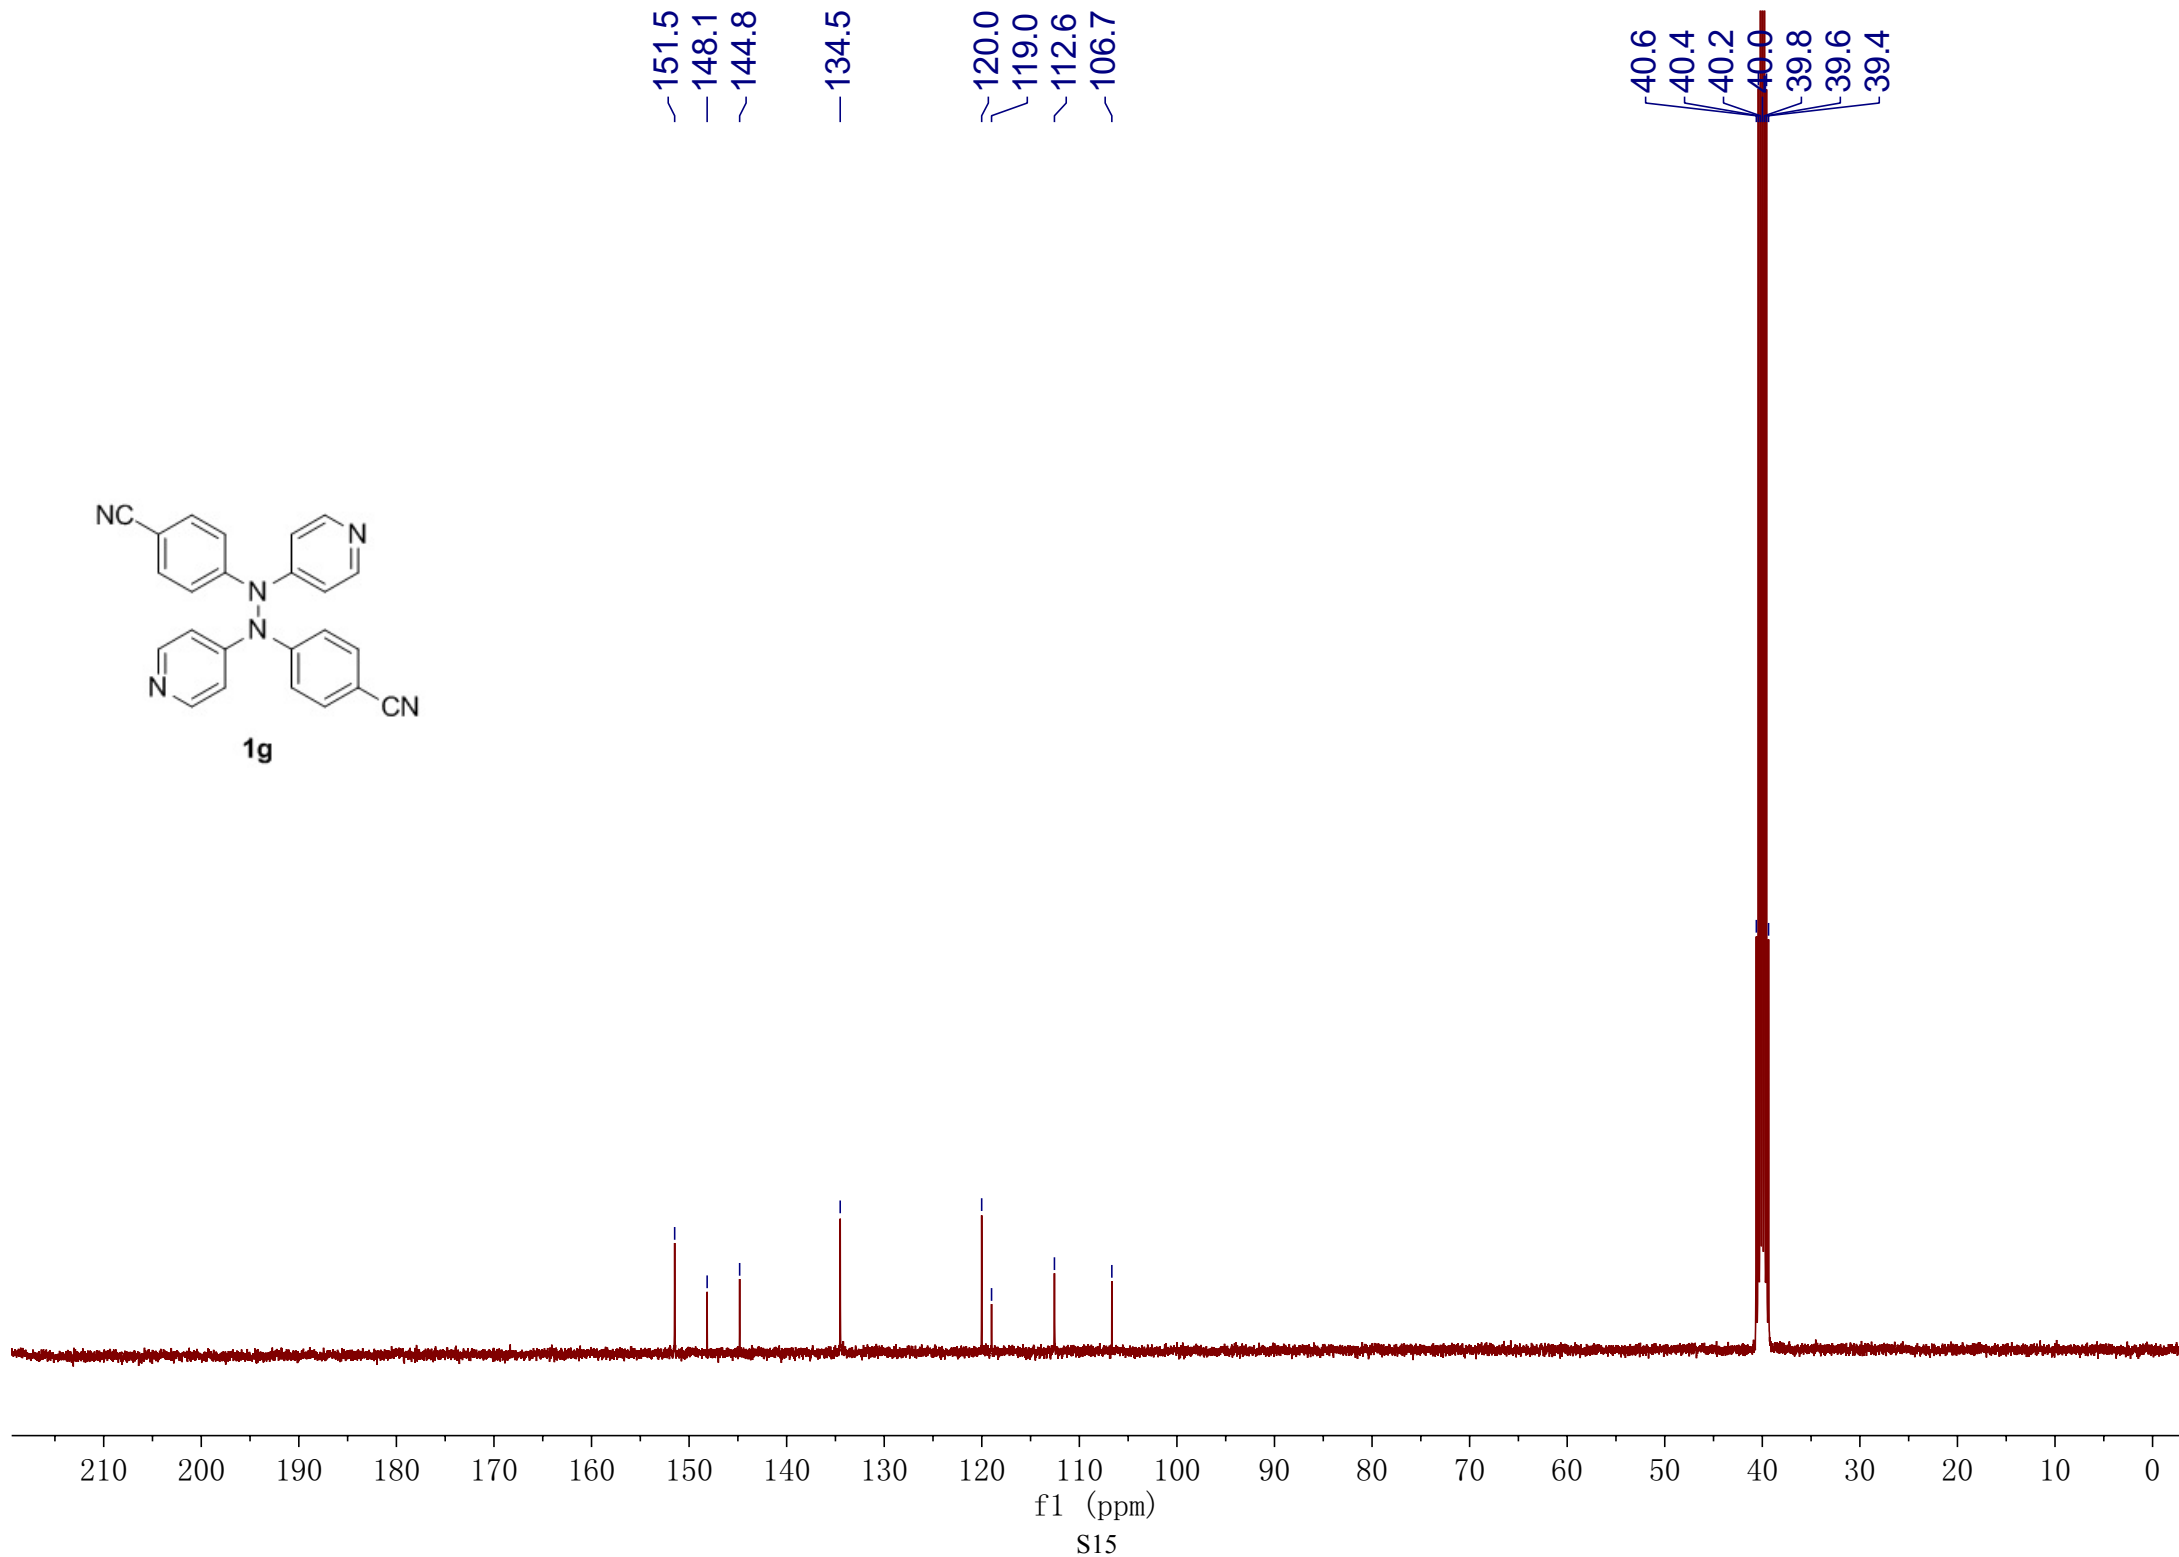

8.444  
8.429  
7.597  
7.576  
7.436  
7.415  
7.268  
7.083  
7.071  
7.068

-0.000

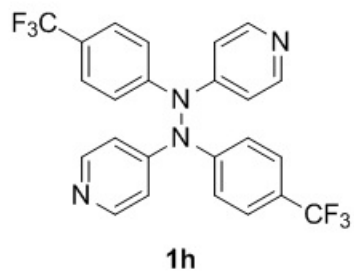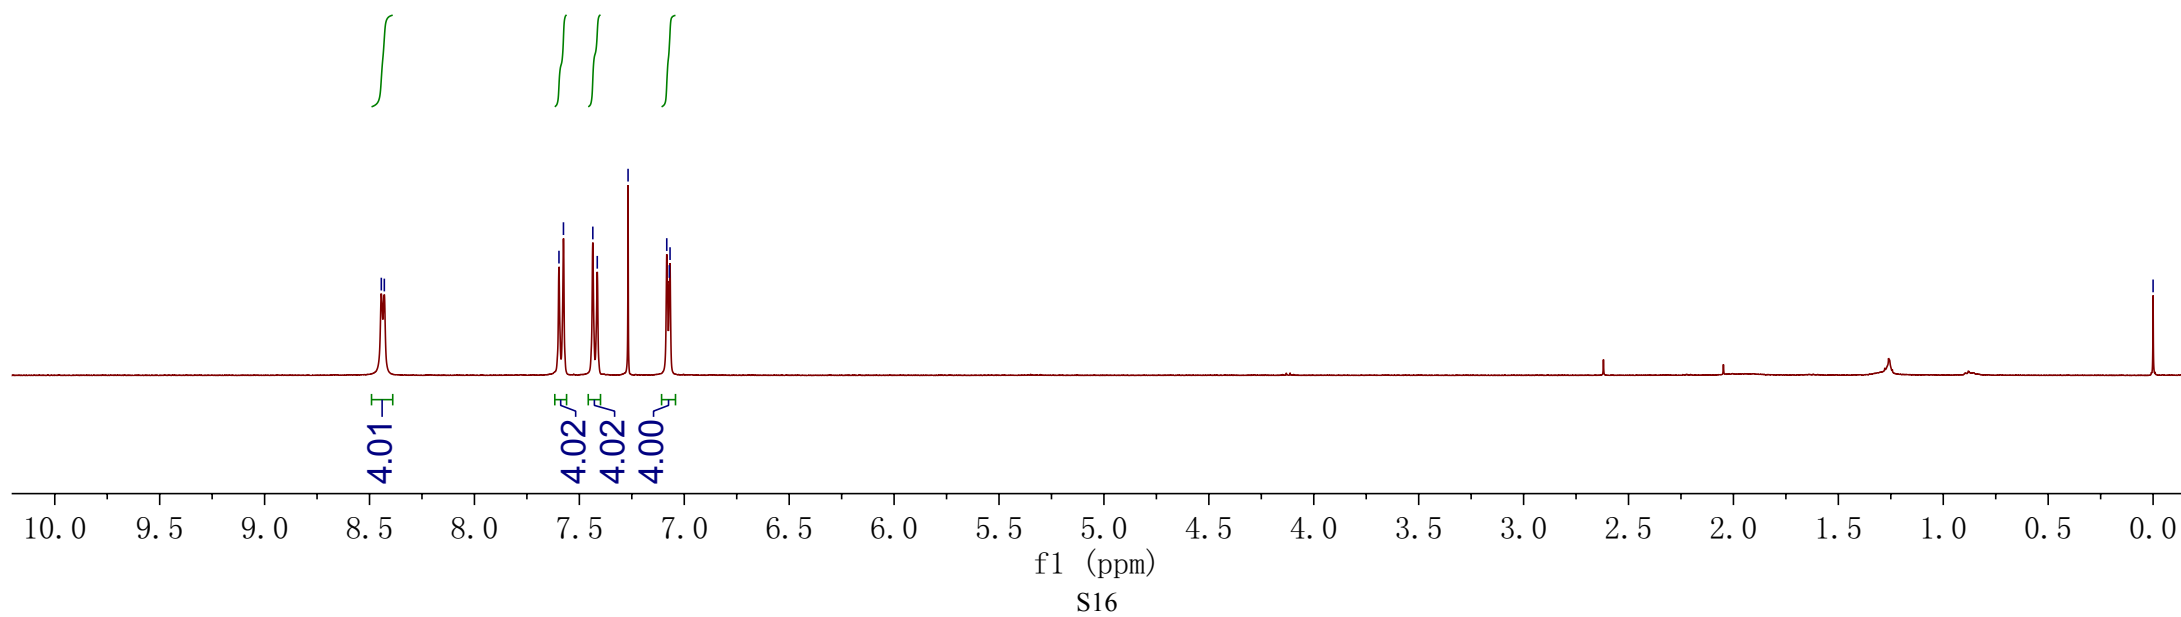



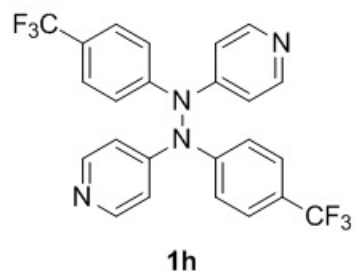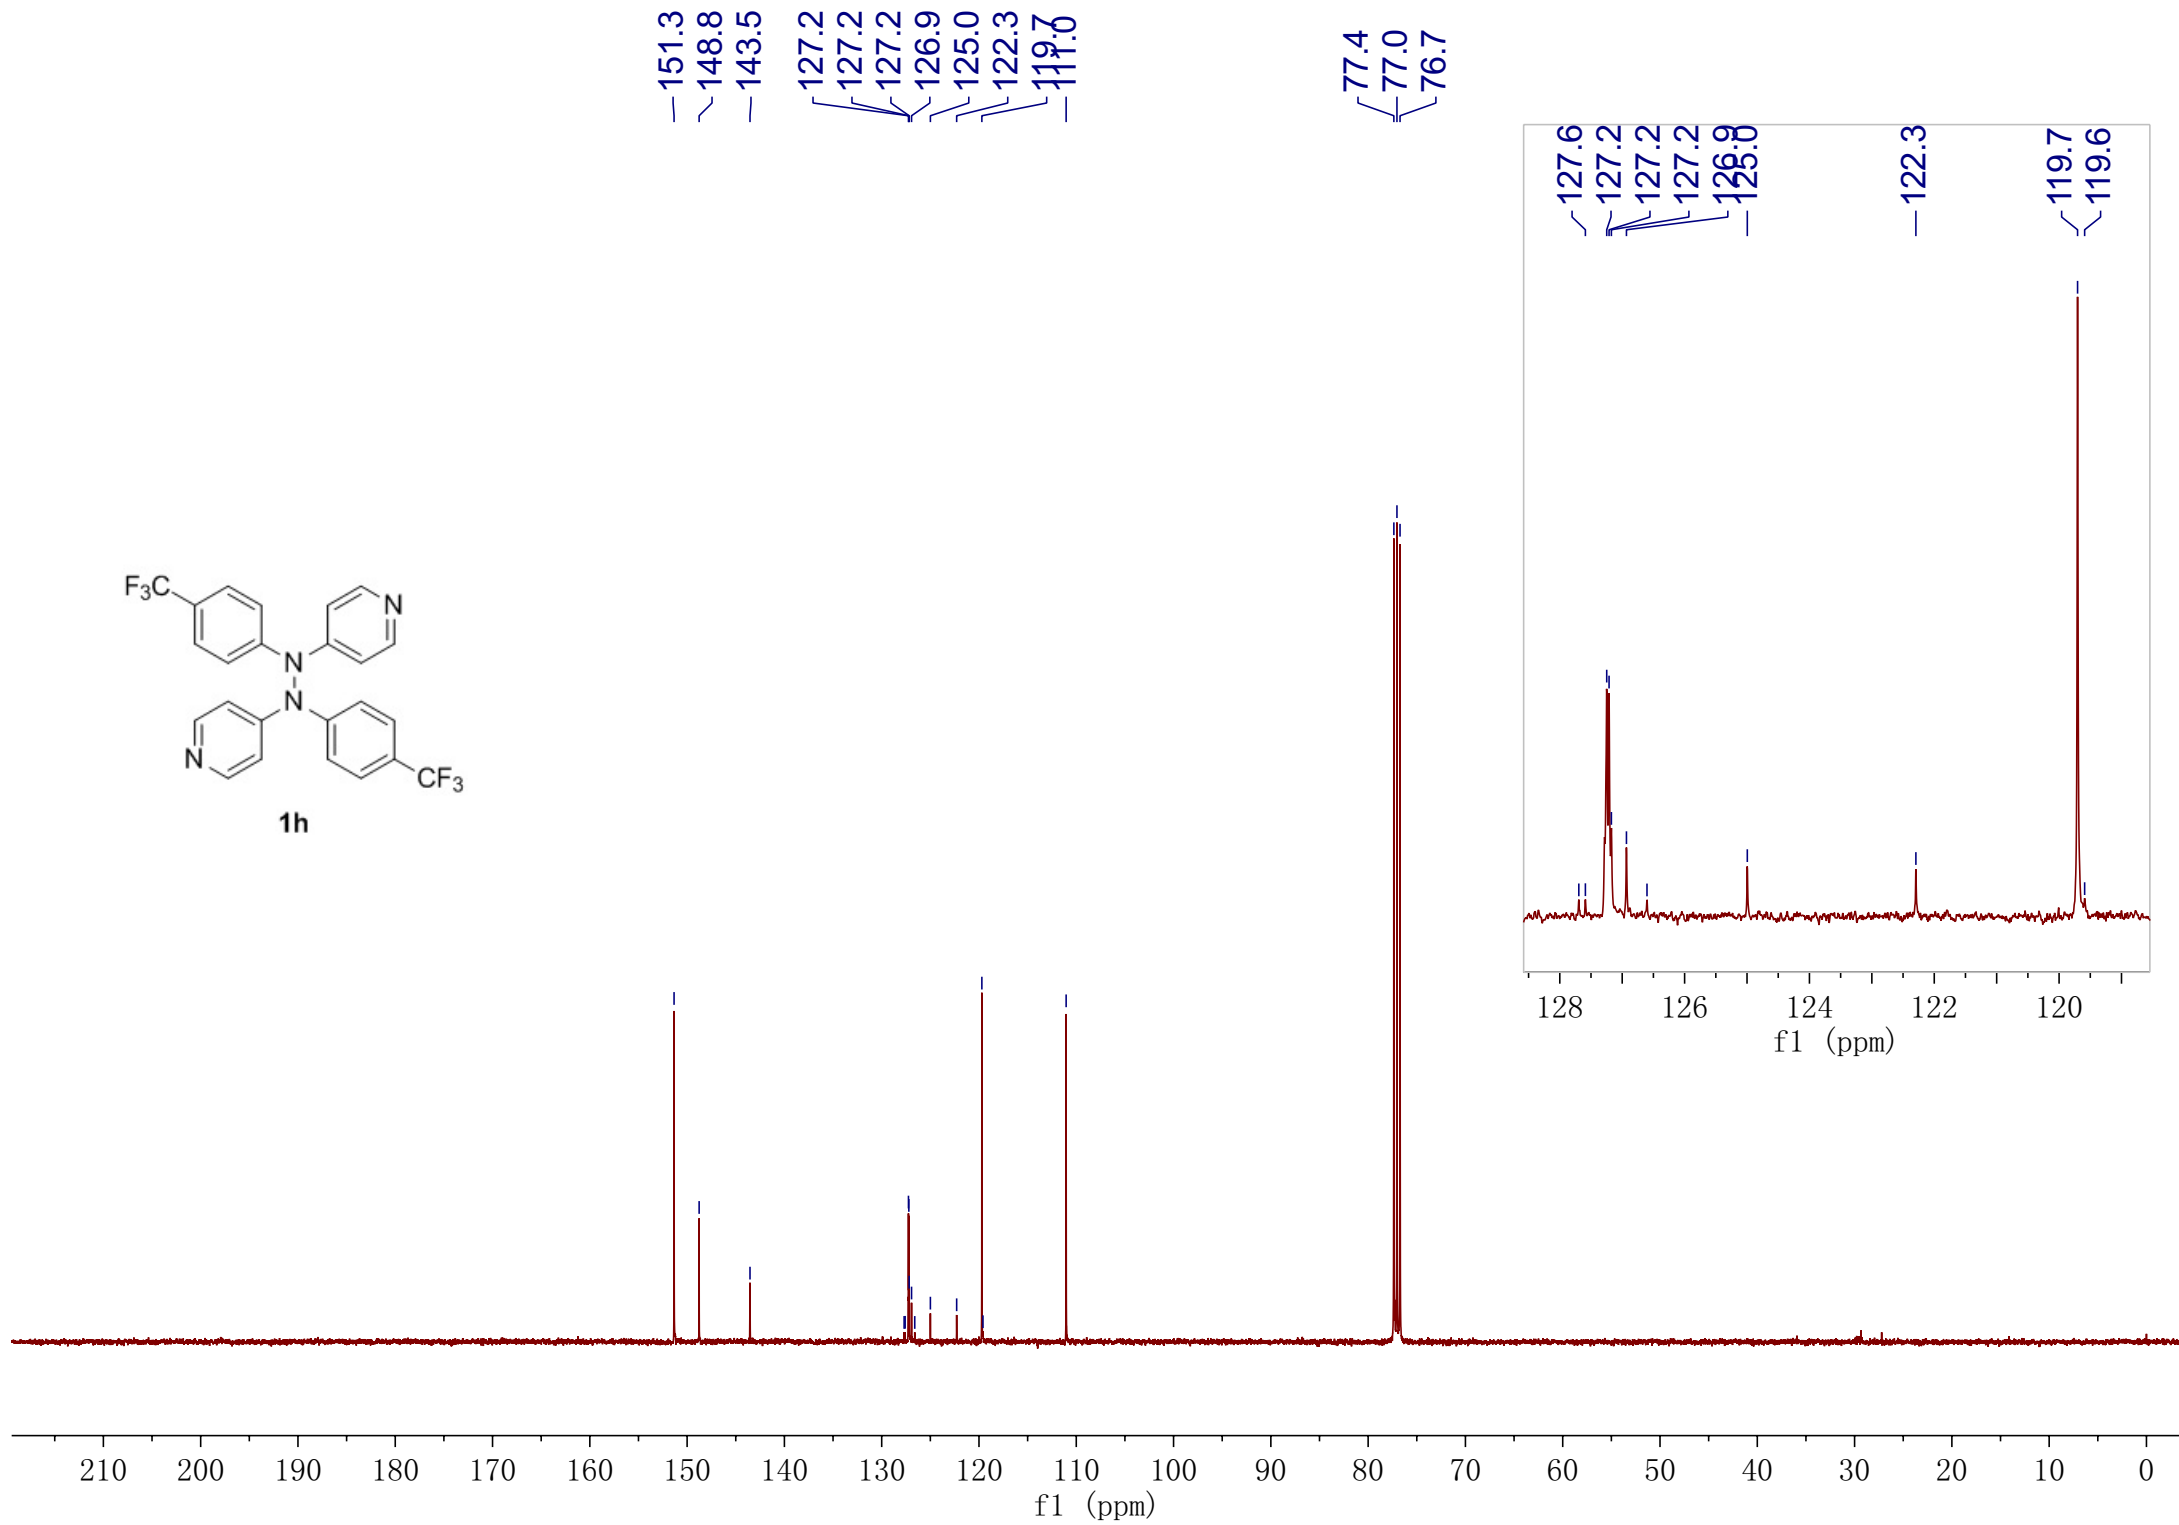

8.335  
8.319  
7.268  
7.209  
7.190  
7.171  
7.111  
7.089  
6.967  
6.951

-2.290

-0.000

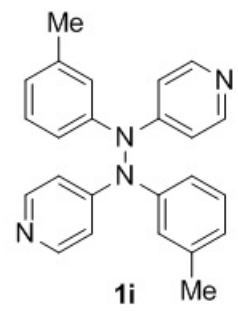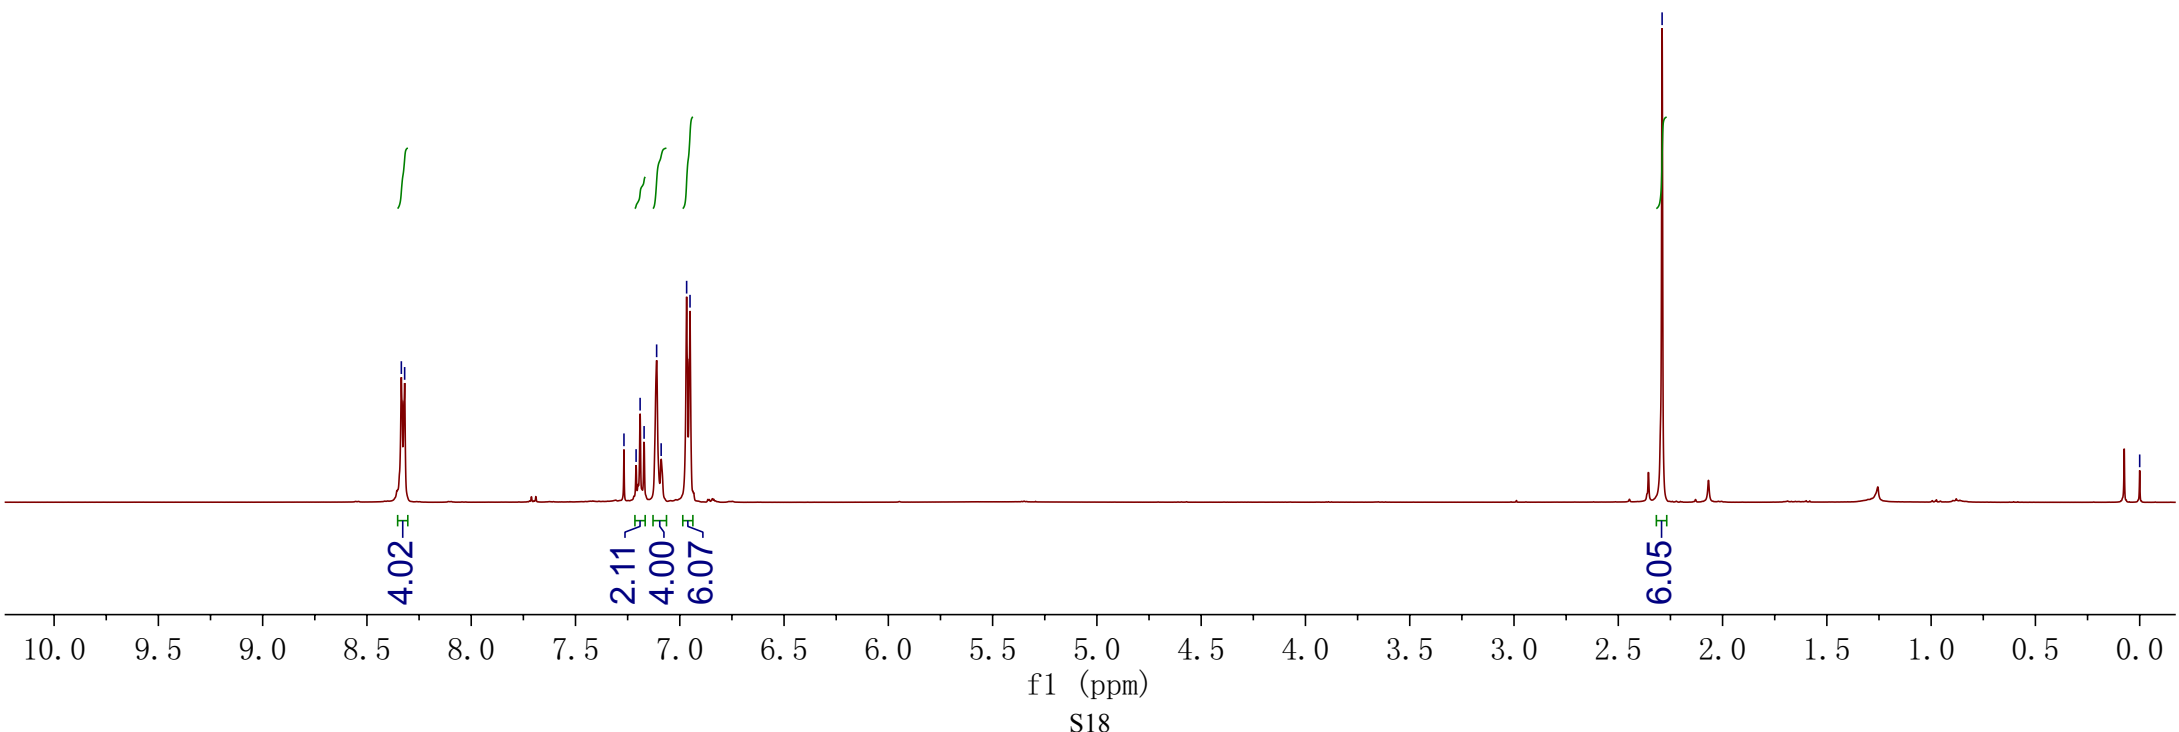

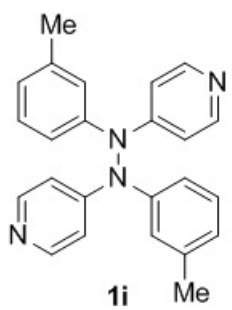

150.6  
150.5  
140.5  
139.7  
129.4  
126.9  
122.7  
119.3  
109.8  
77.4  
77.1  
76.7  
21.5

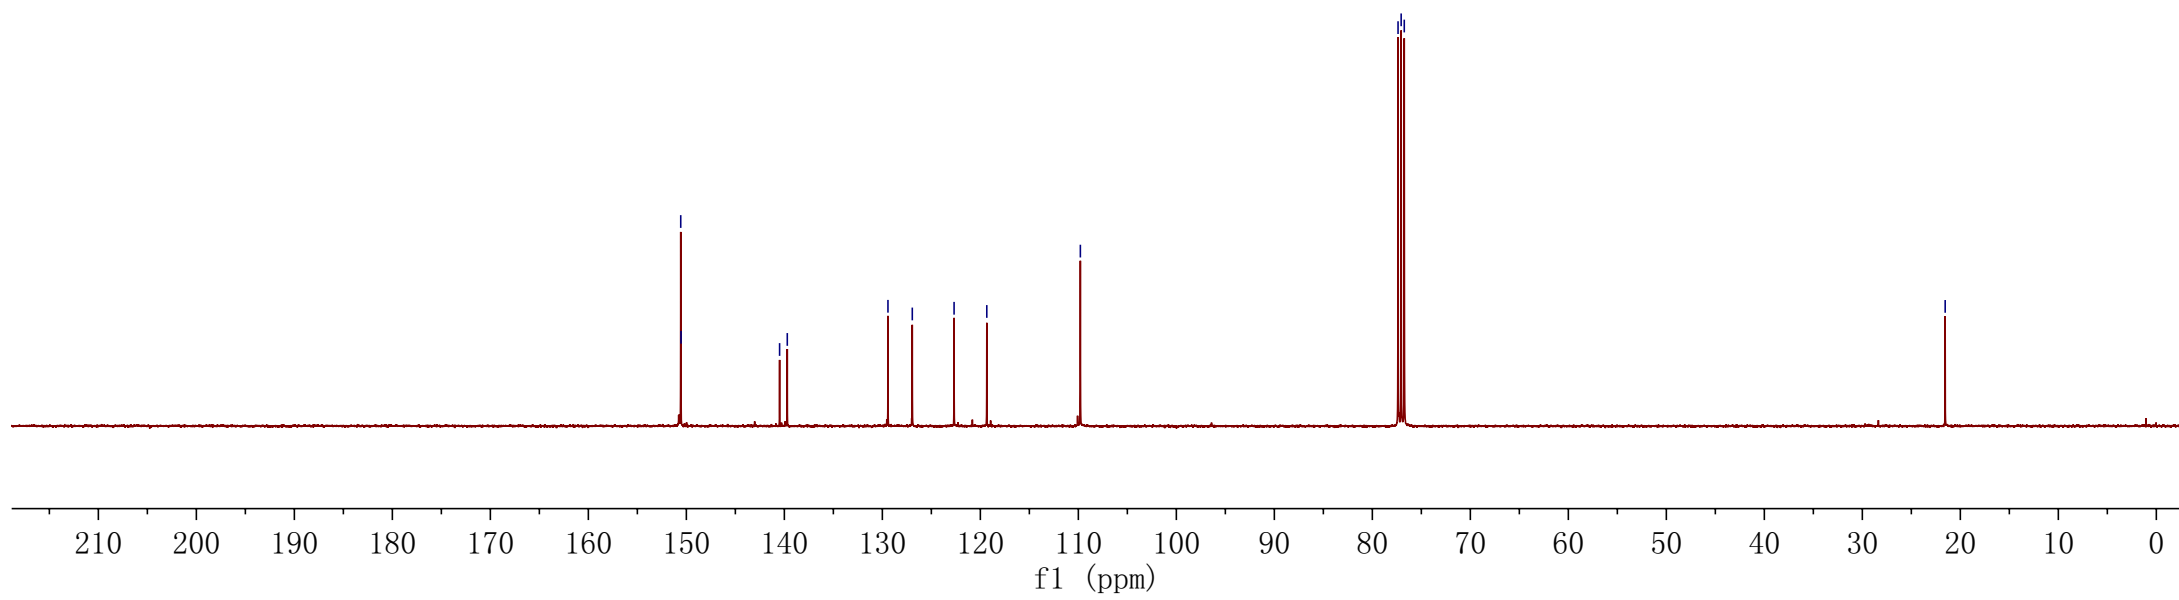

8.204  
8.190  
7.271  
7.166  
7.145  
7.103  
7.082  
6.770  
6.765  
6.747  
6.741  
6.733  
6.727

2.422  
2.297

-0.000

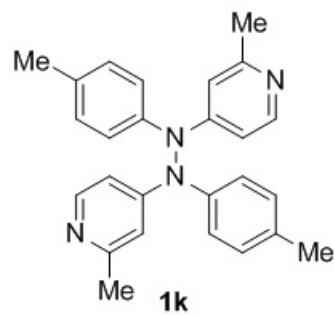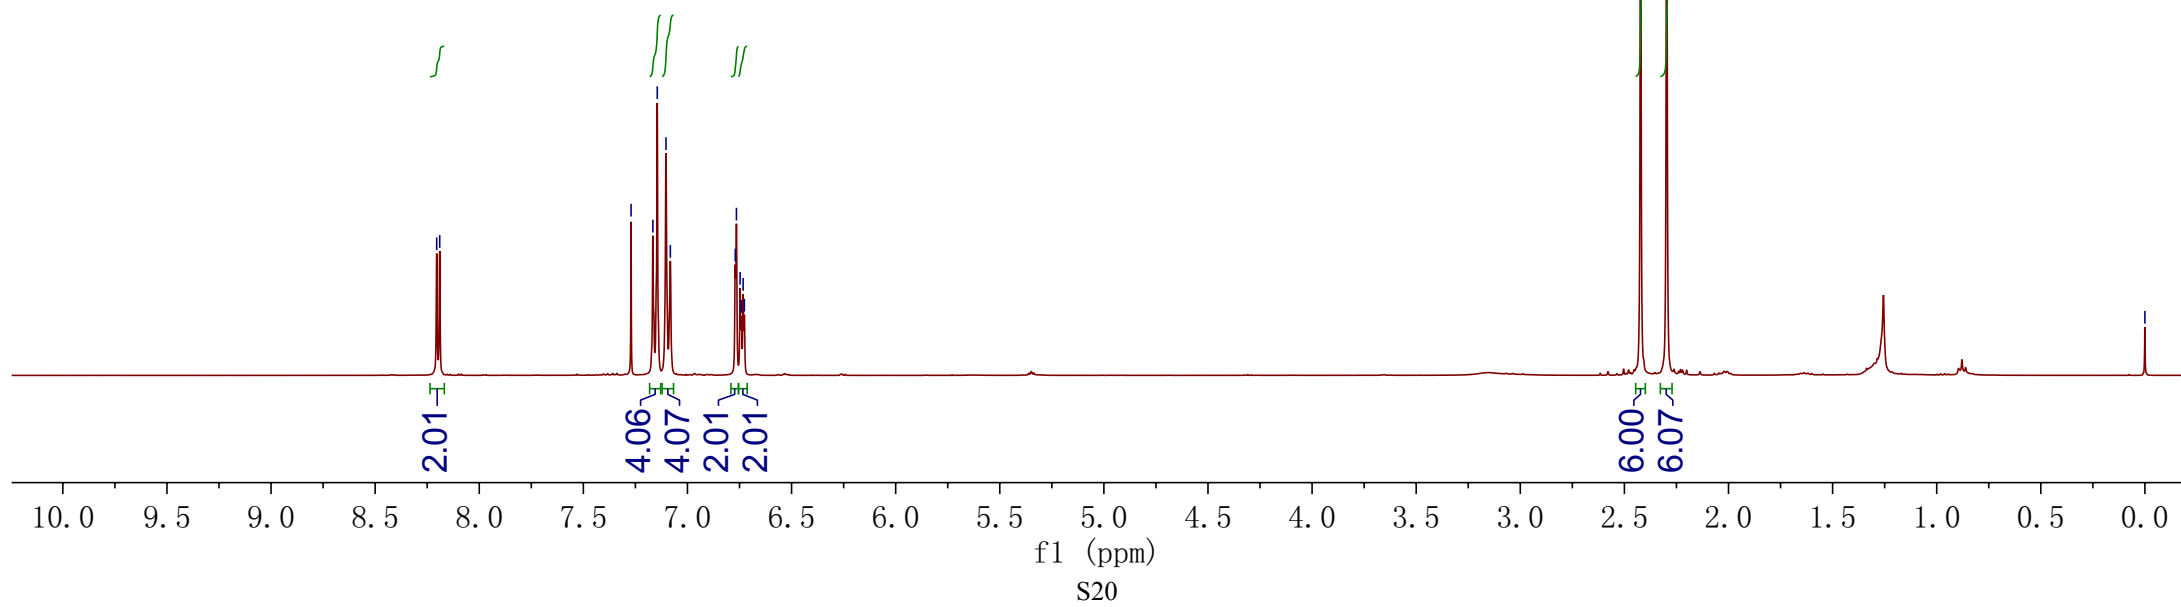

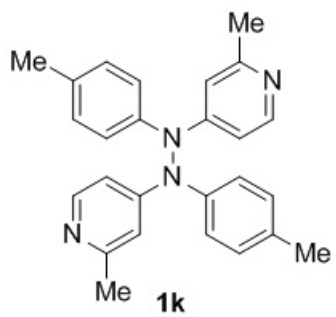

~159.3  
~151.4  
~149.9

~138.2  
~136.0  
~130.2  
~122.9

~108.2  
~107.0

77.4  
77.1  
76.7

-24.8  
-21.0

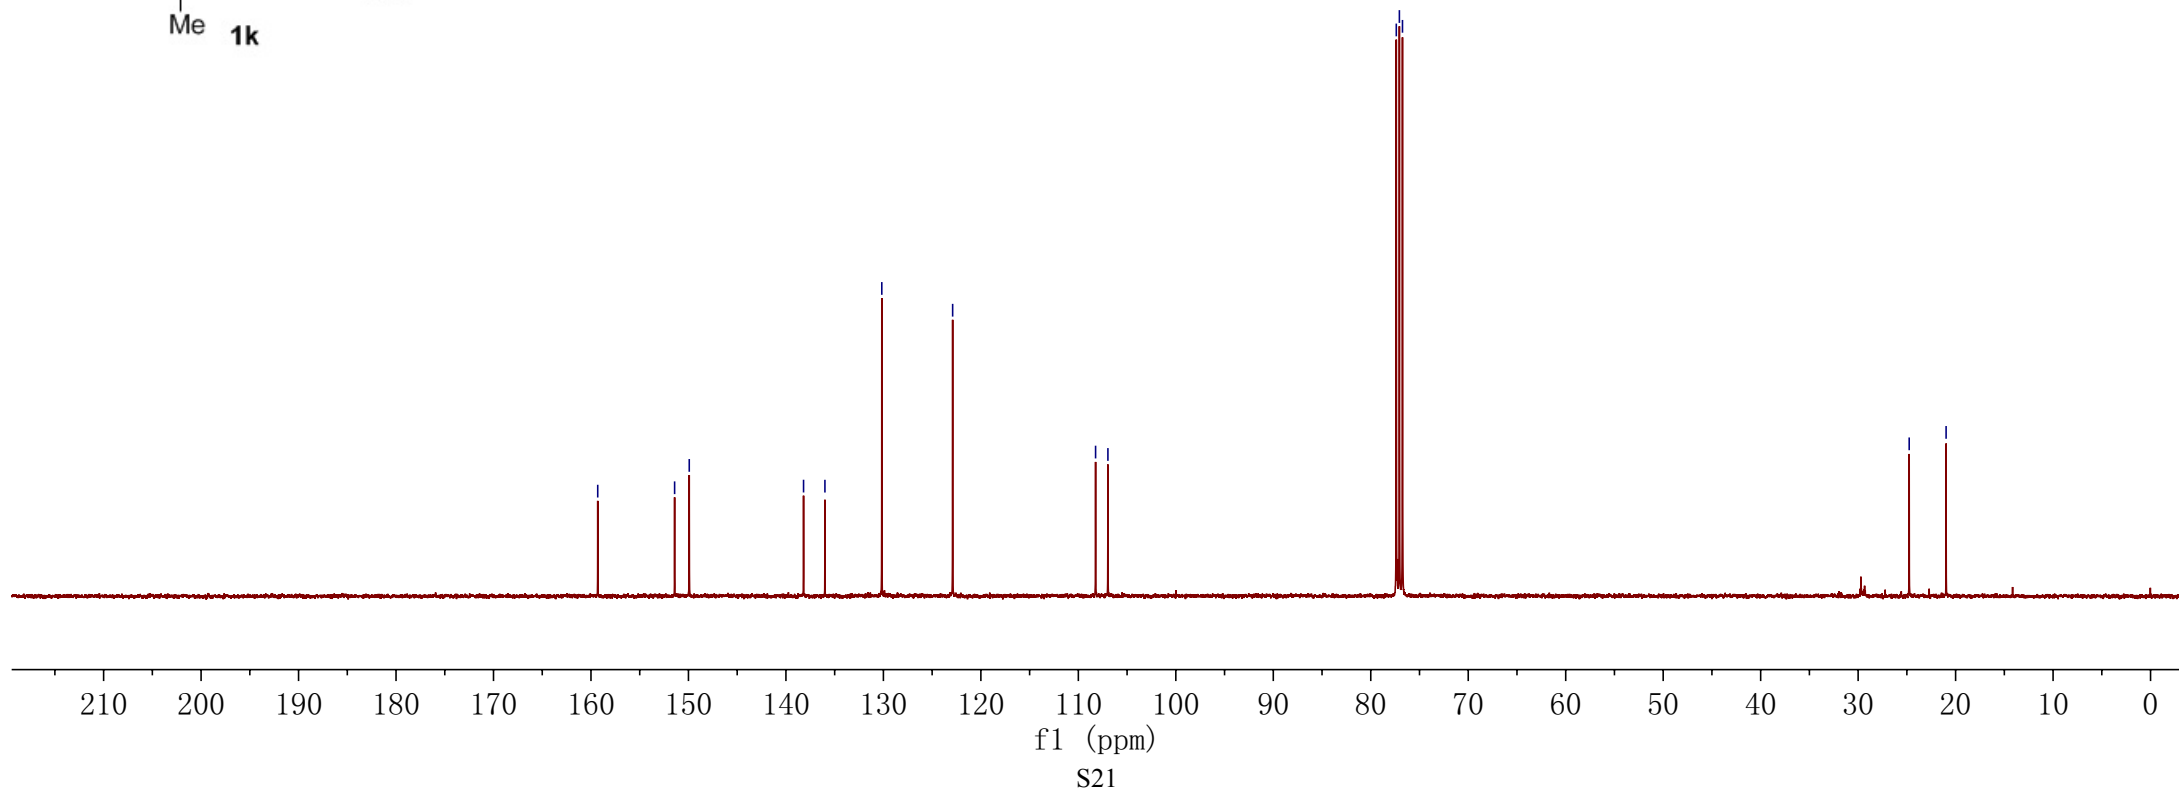

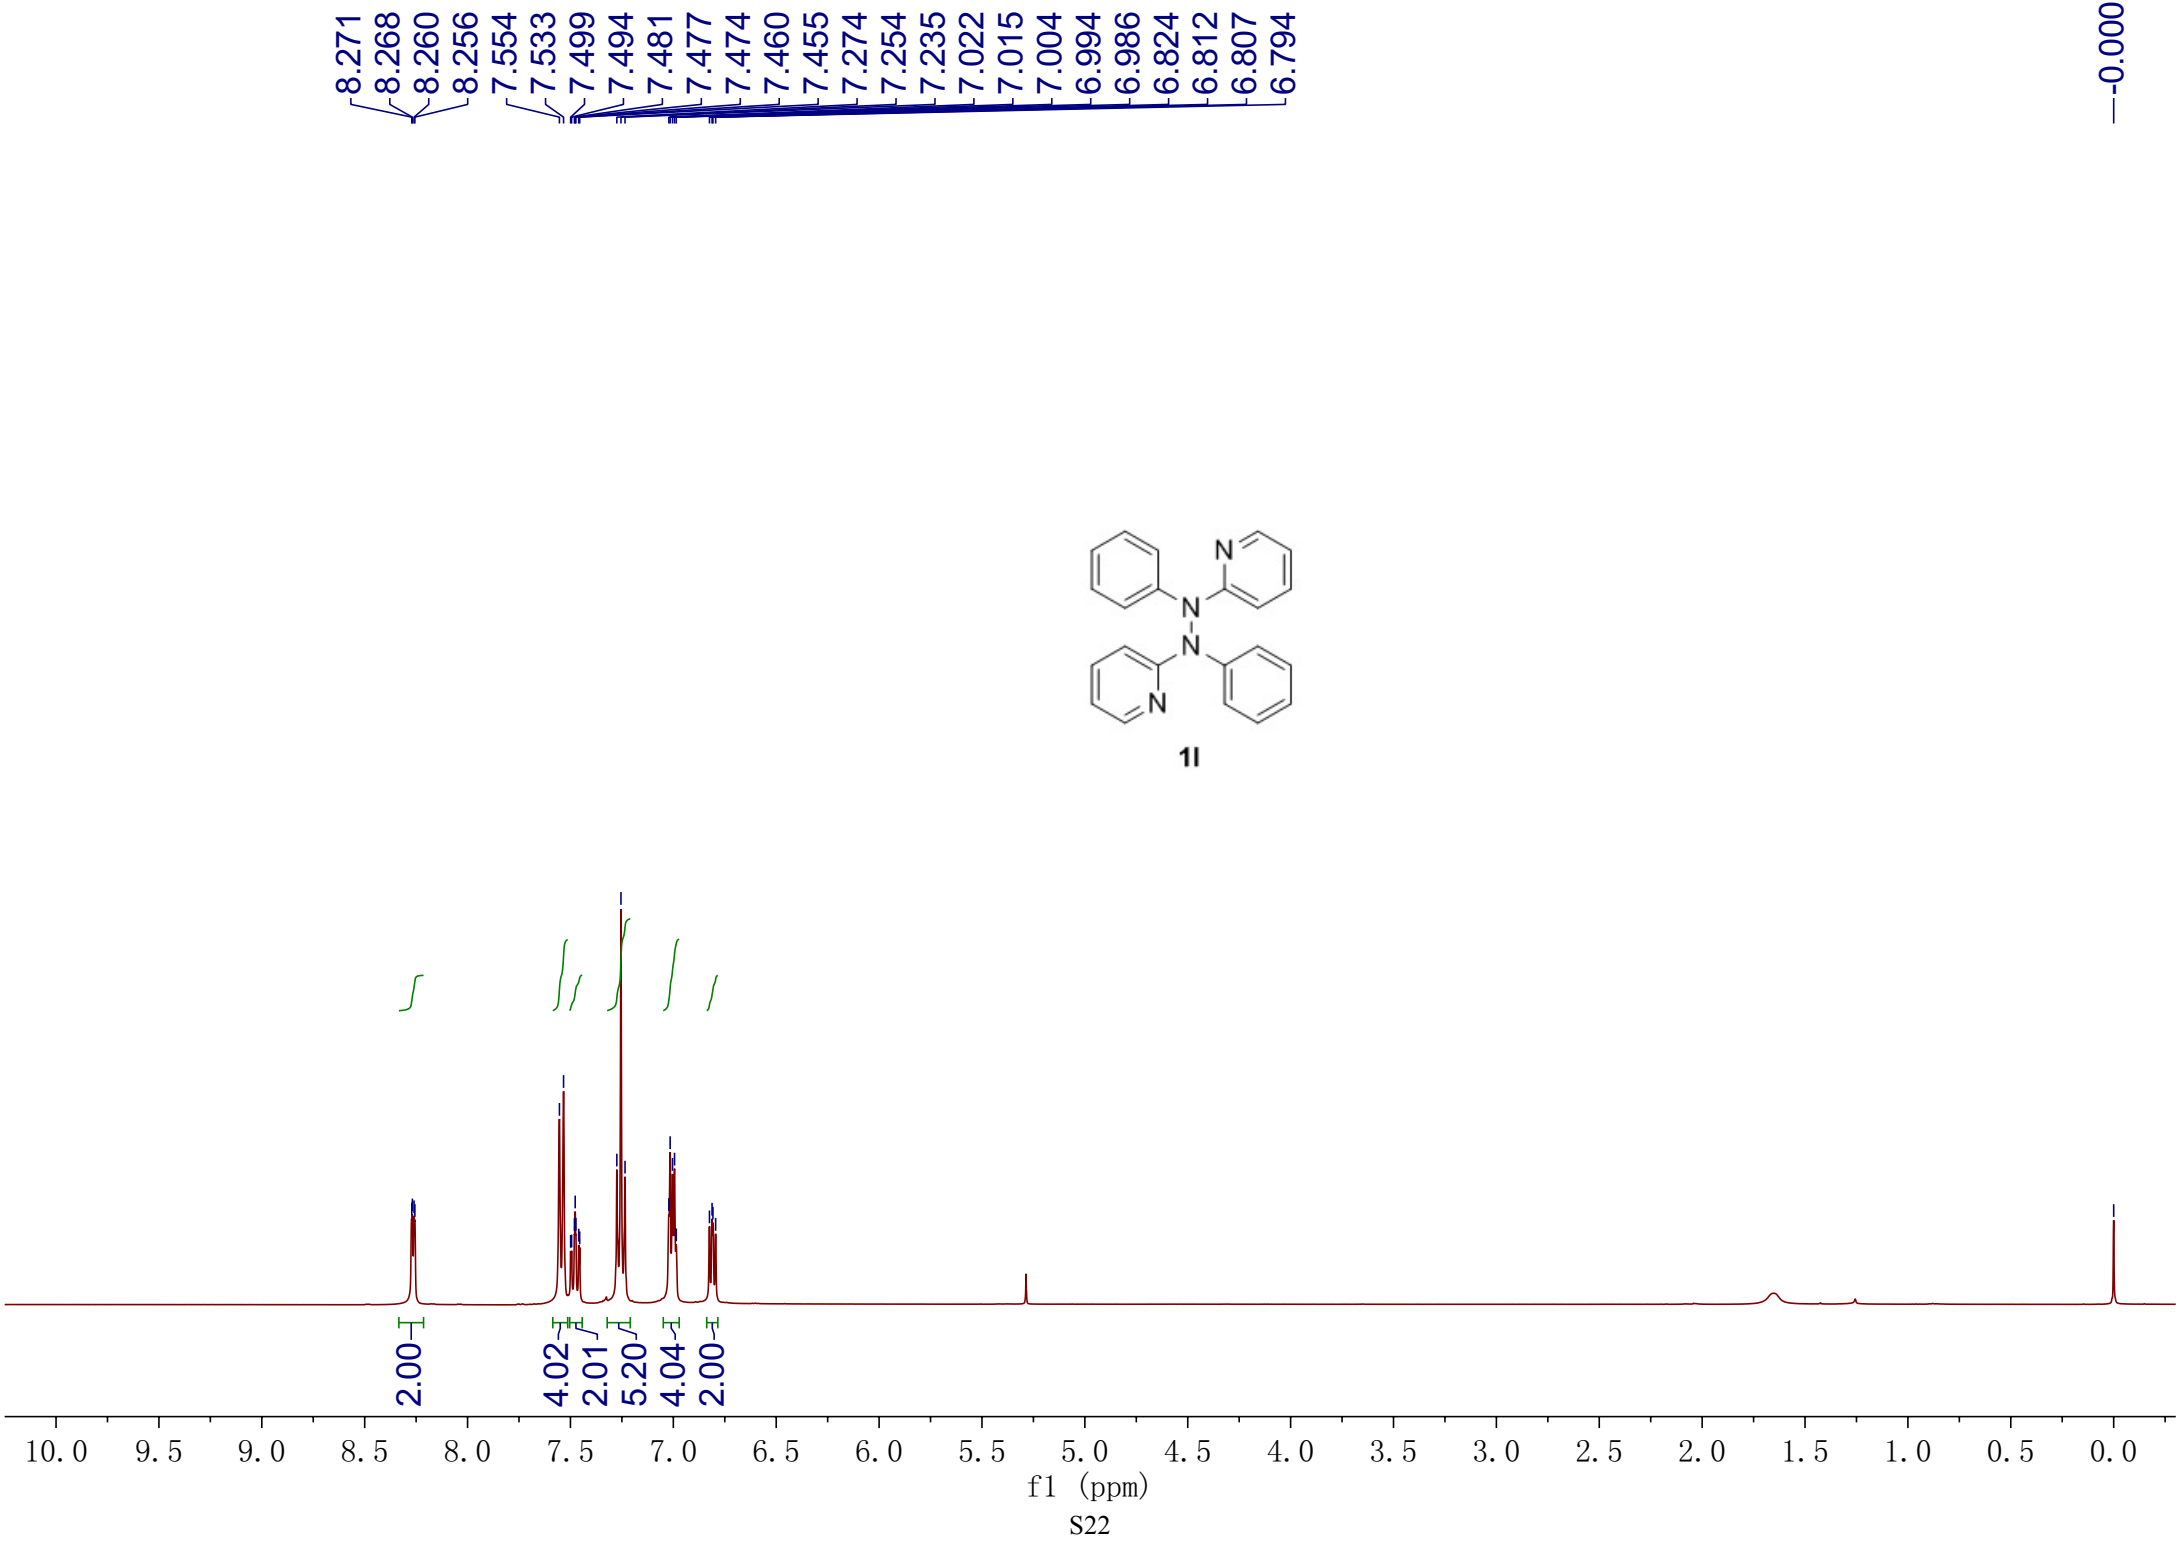

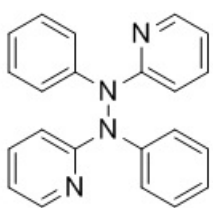

**11**

— 156.2

~ 147.9

~ 141.8

~ 138.3

~ 128.8

— 123.7

~ 120.2

~ 117.0

~ 110.6

77.4

77.0

76.7

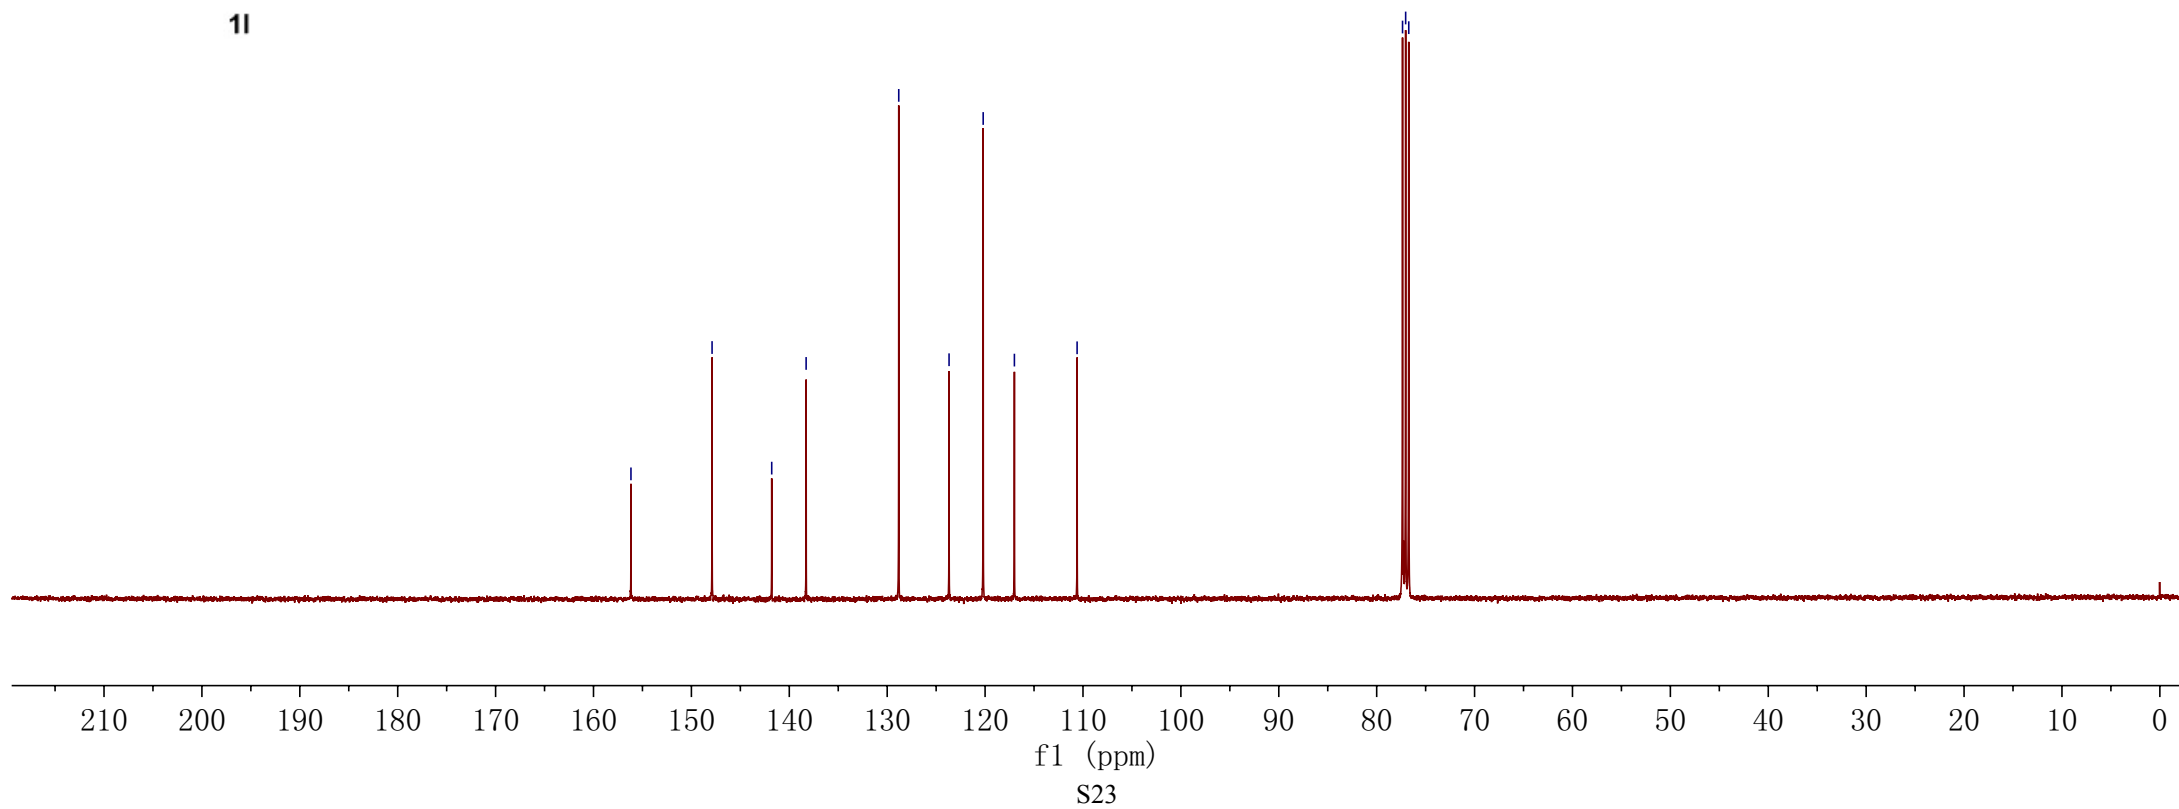

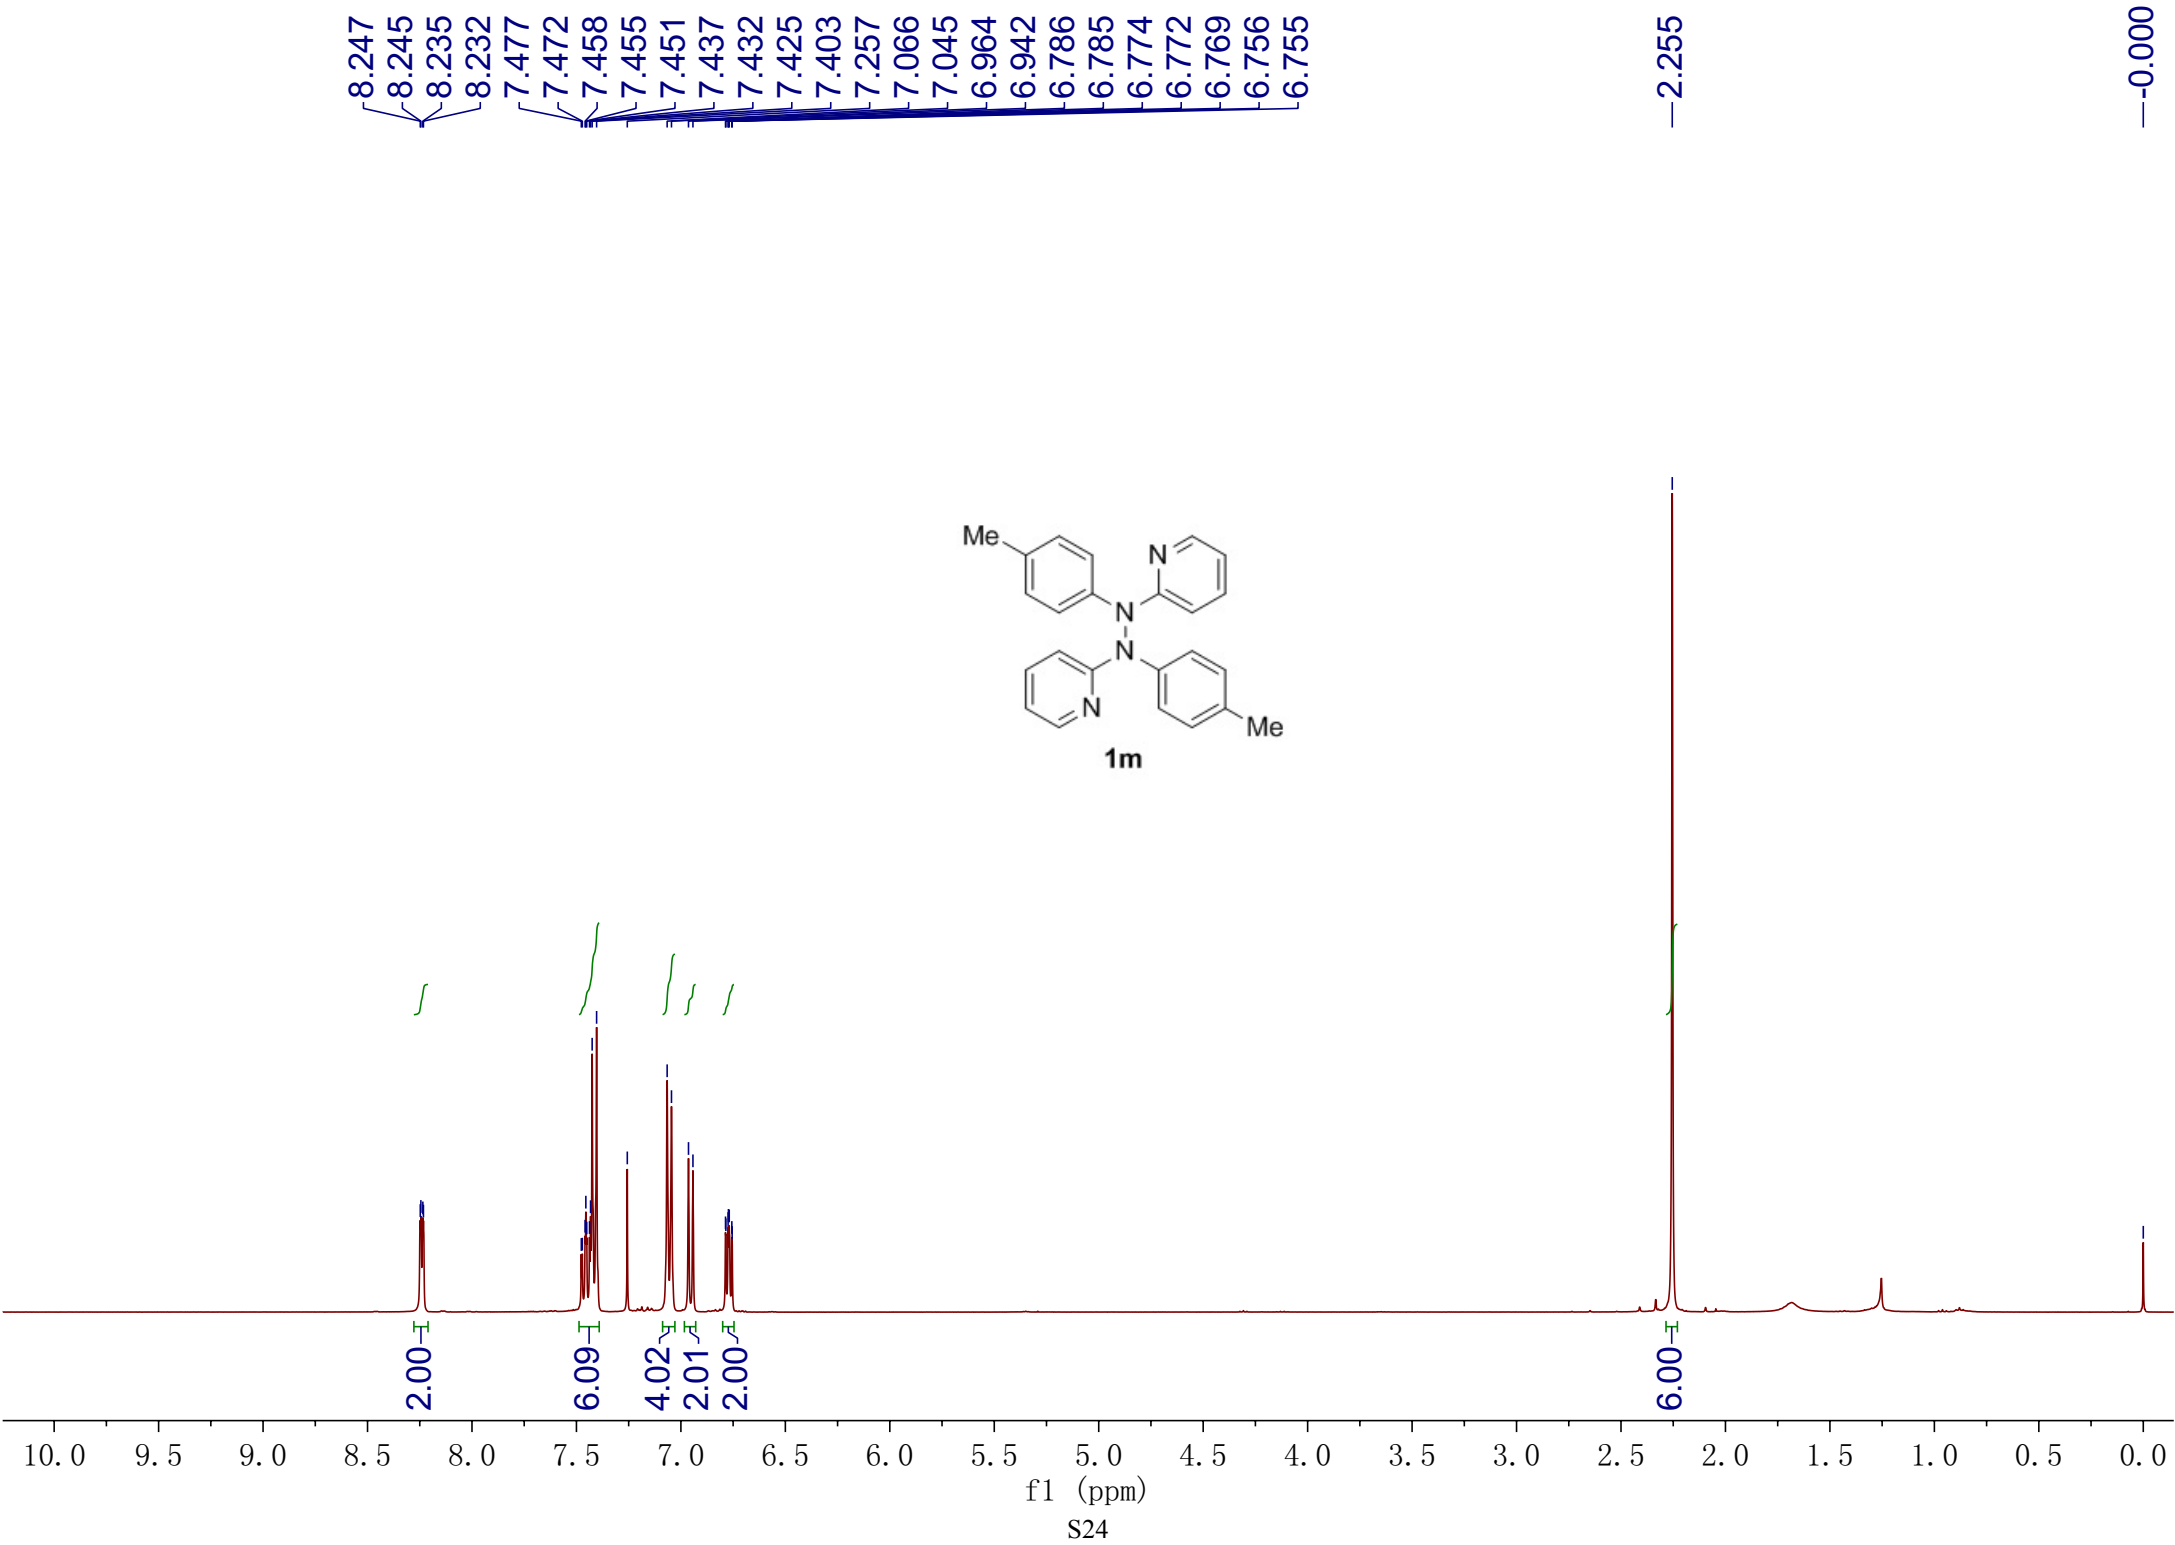



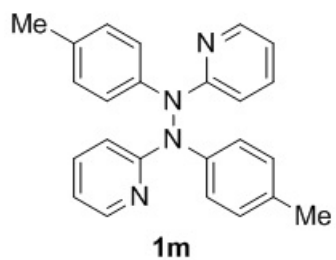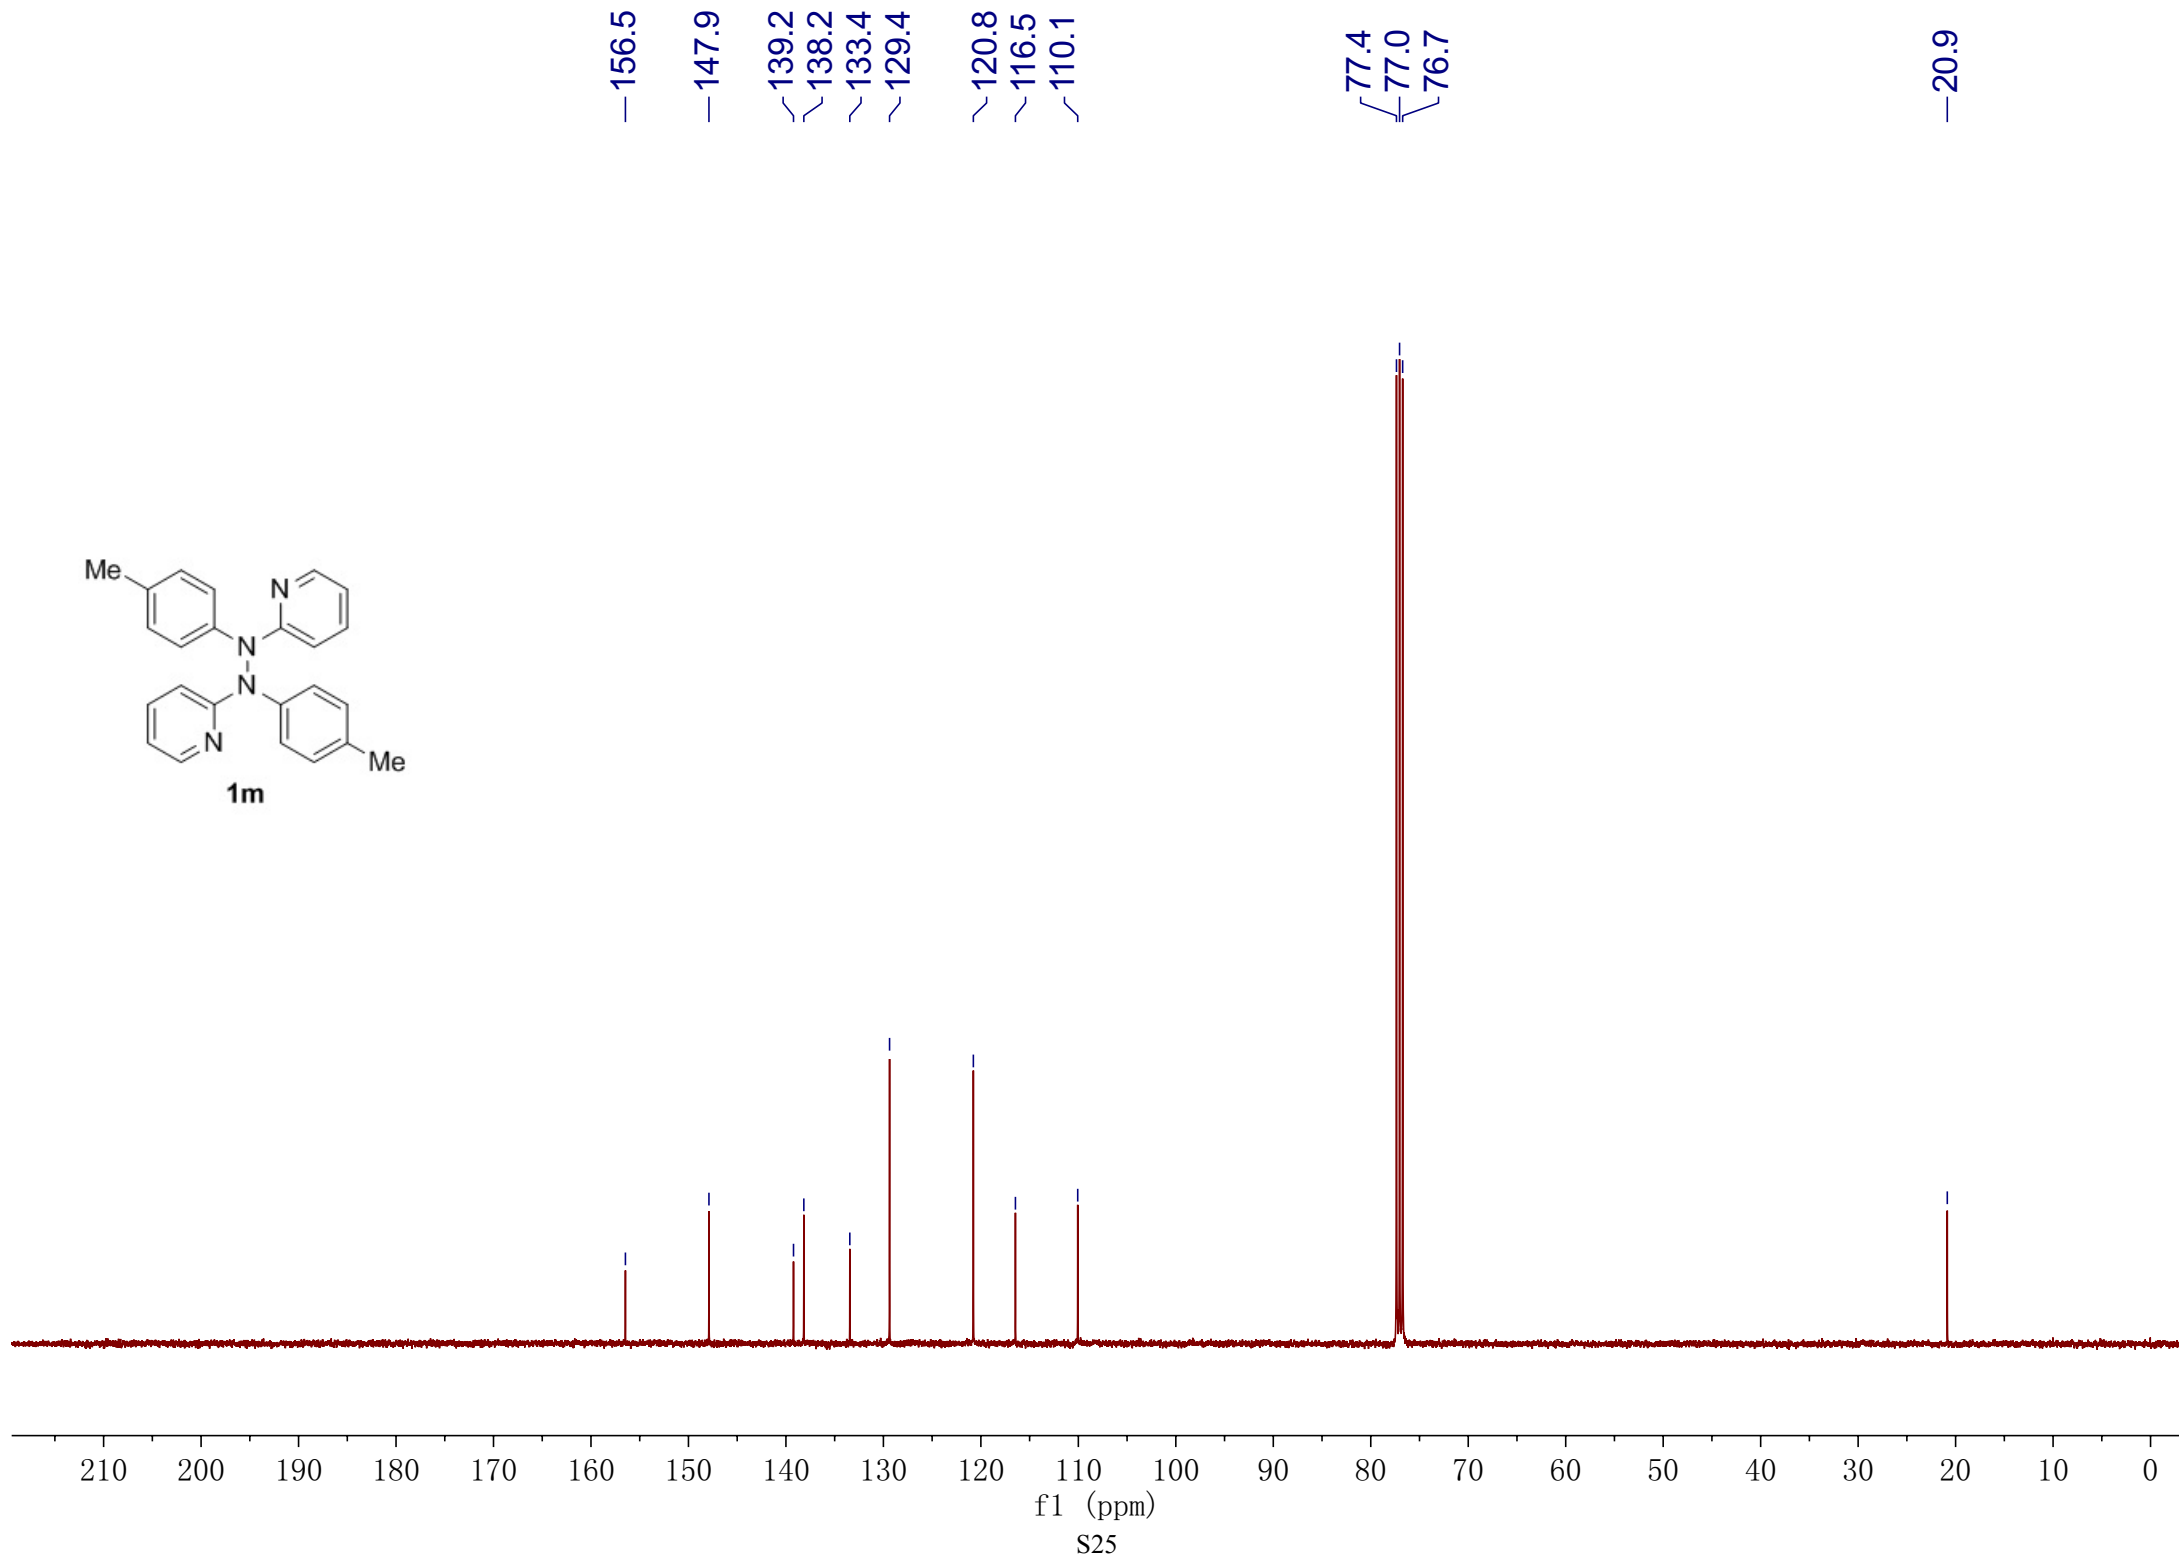

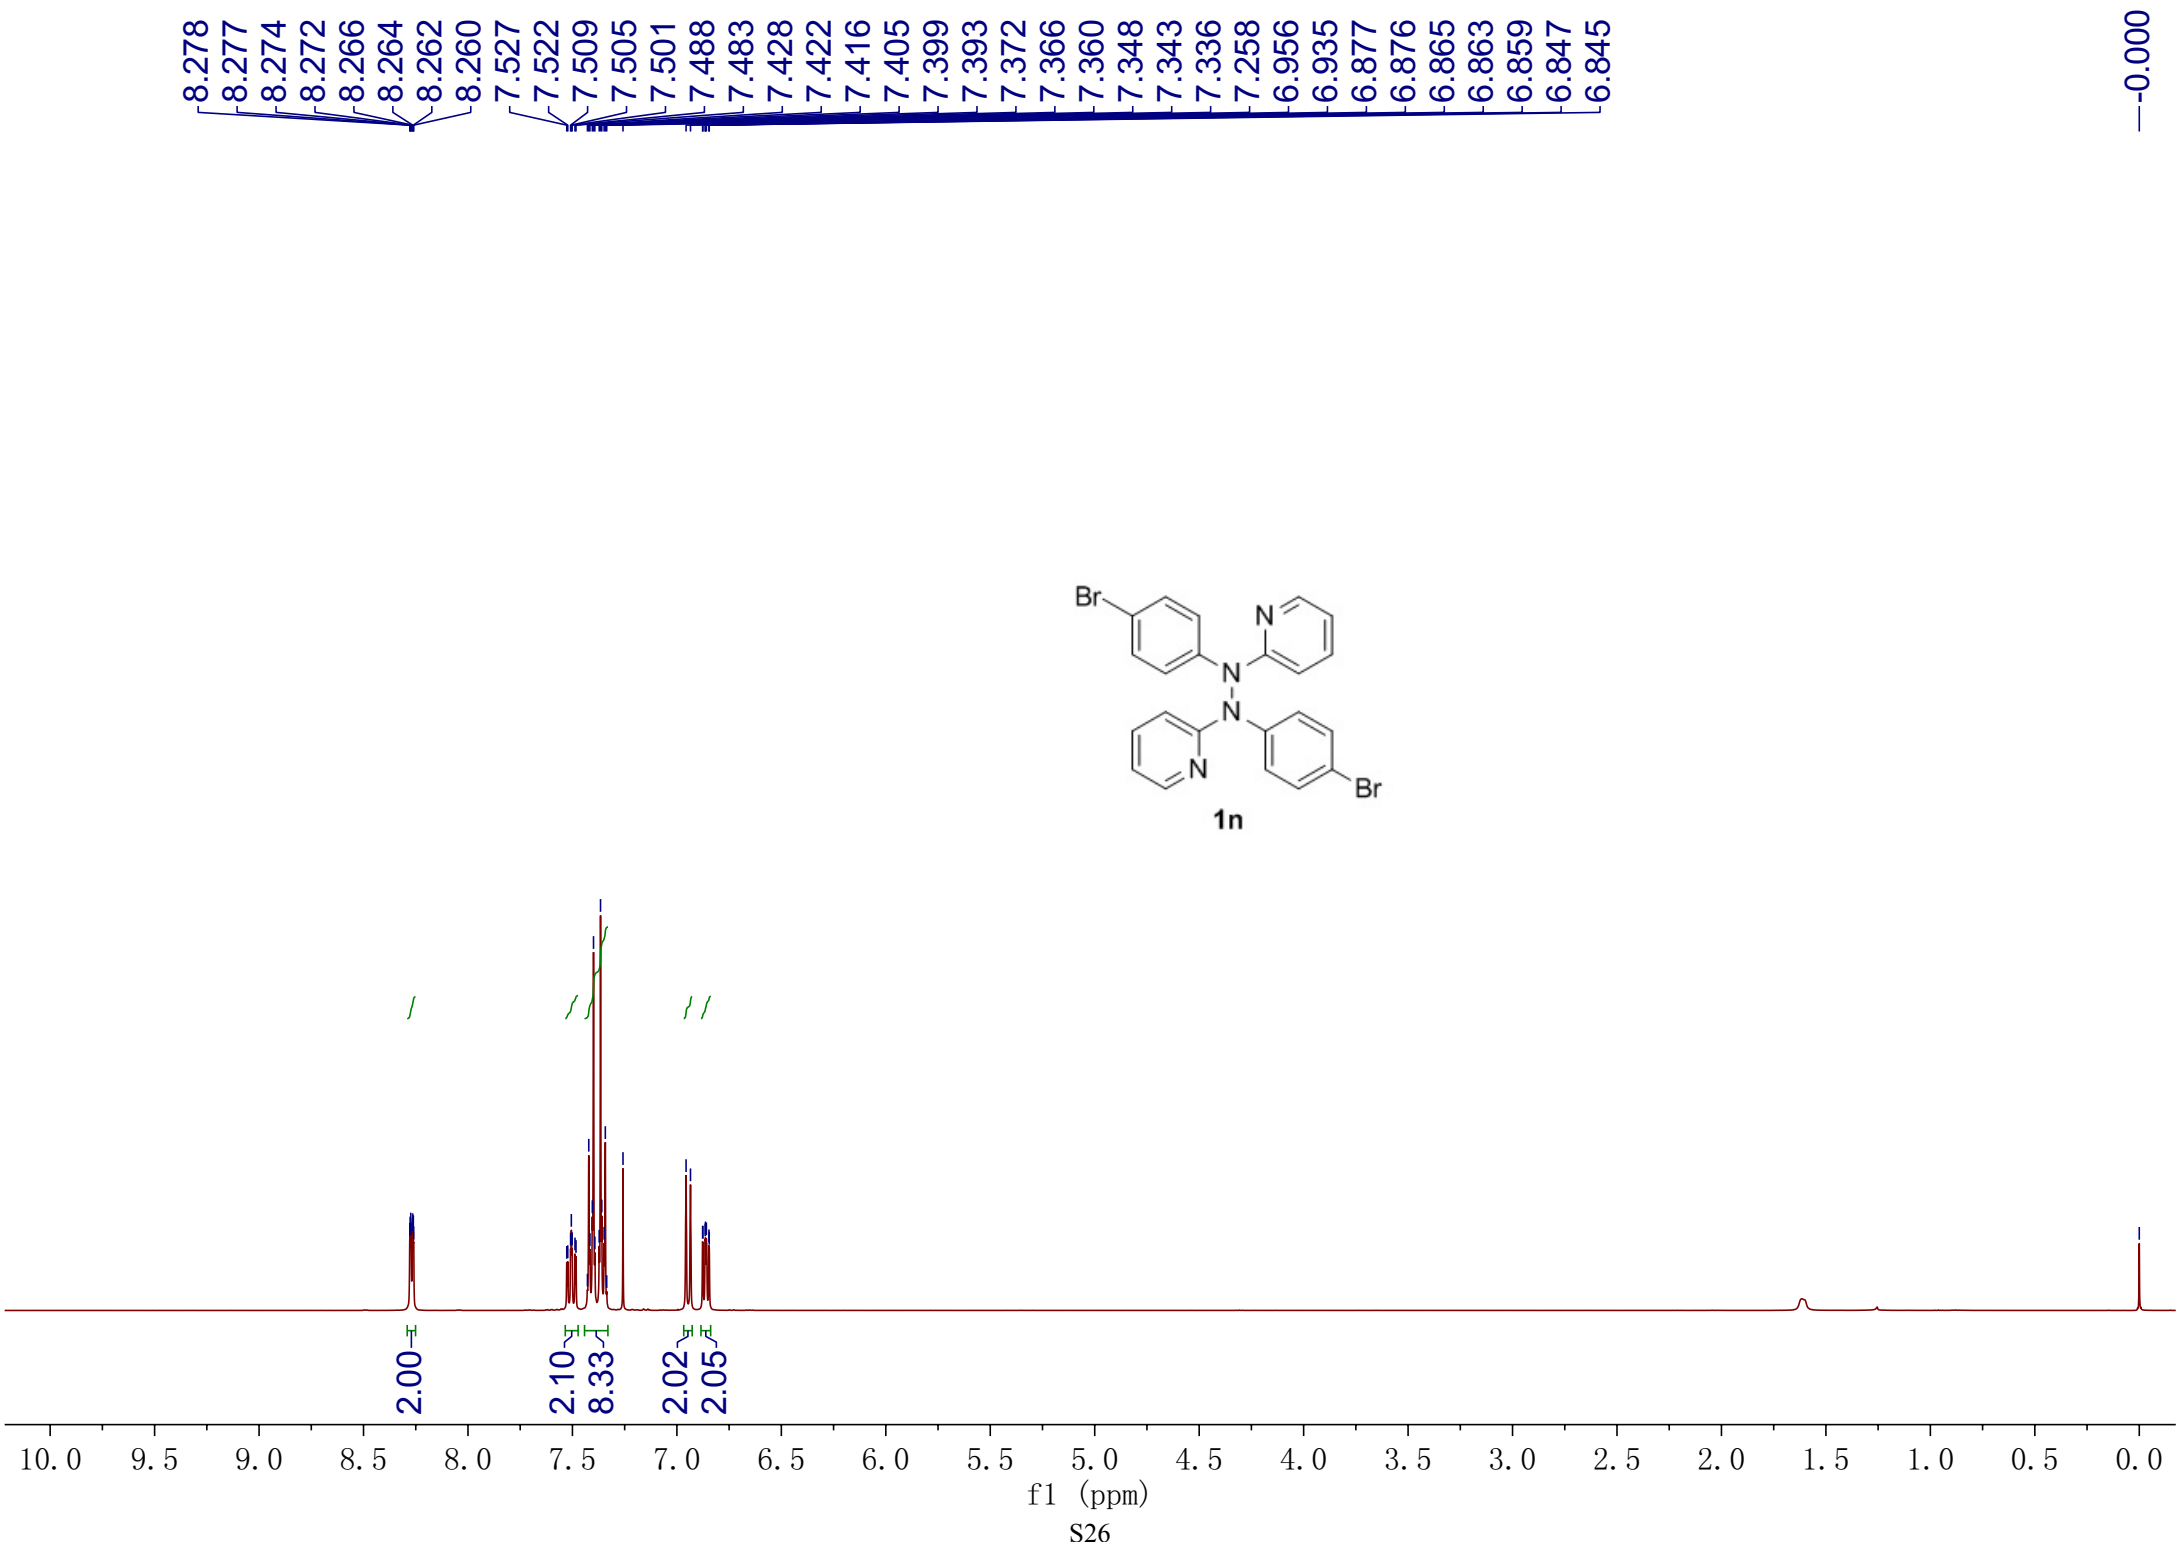

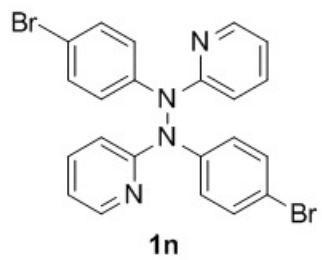

155.5  
148.0  
140.7  
138.6  
131.9  
121.6  
117.7  
116.2  
110.6  
77.4  
77.0  
76.7

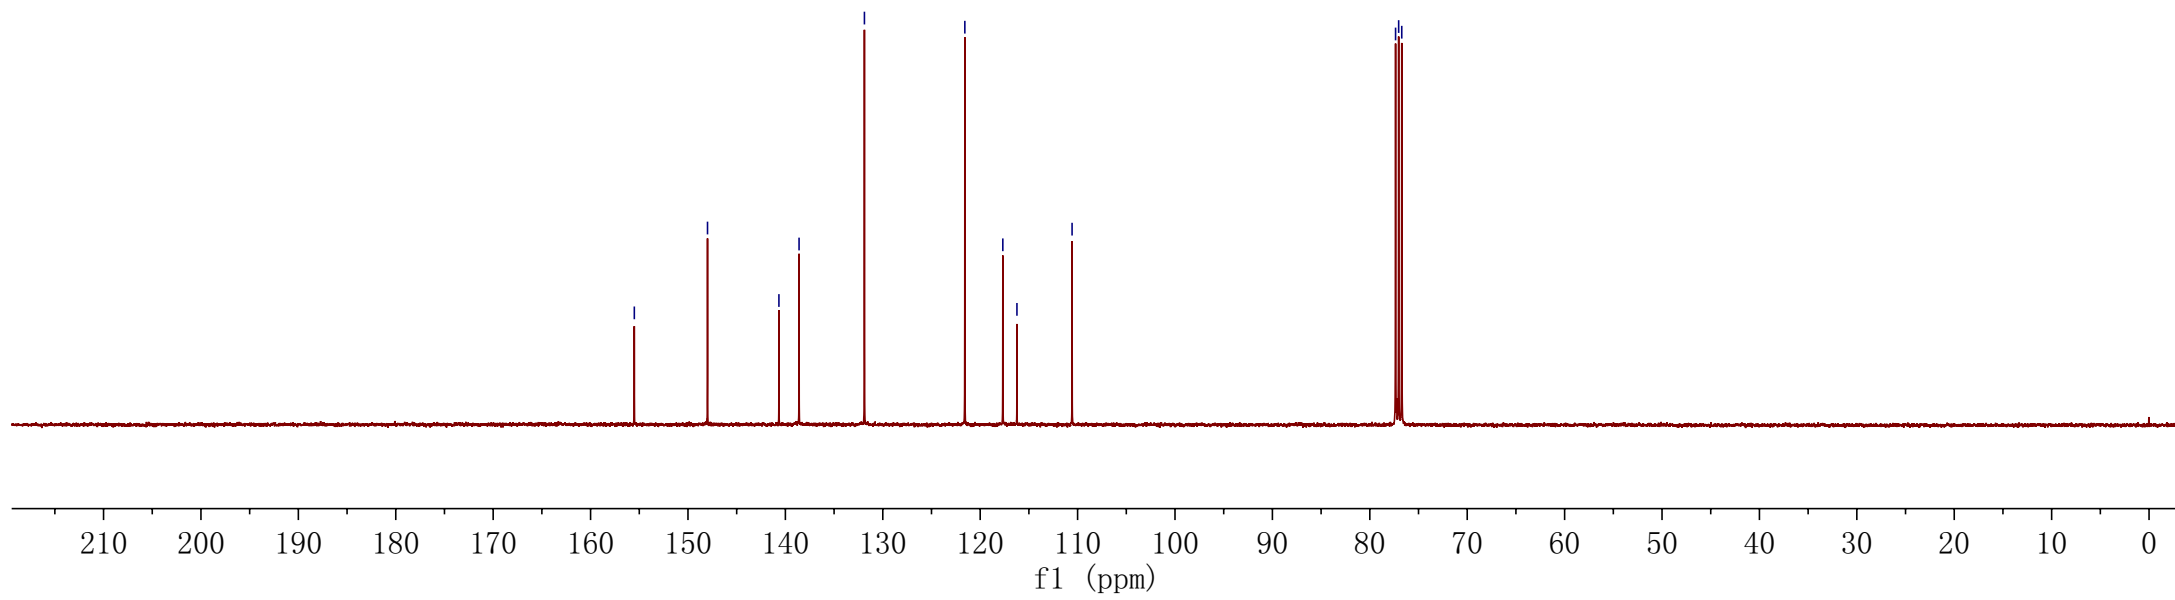

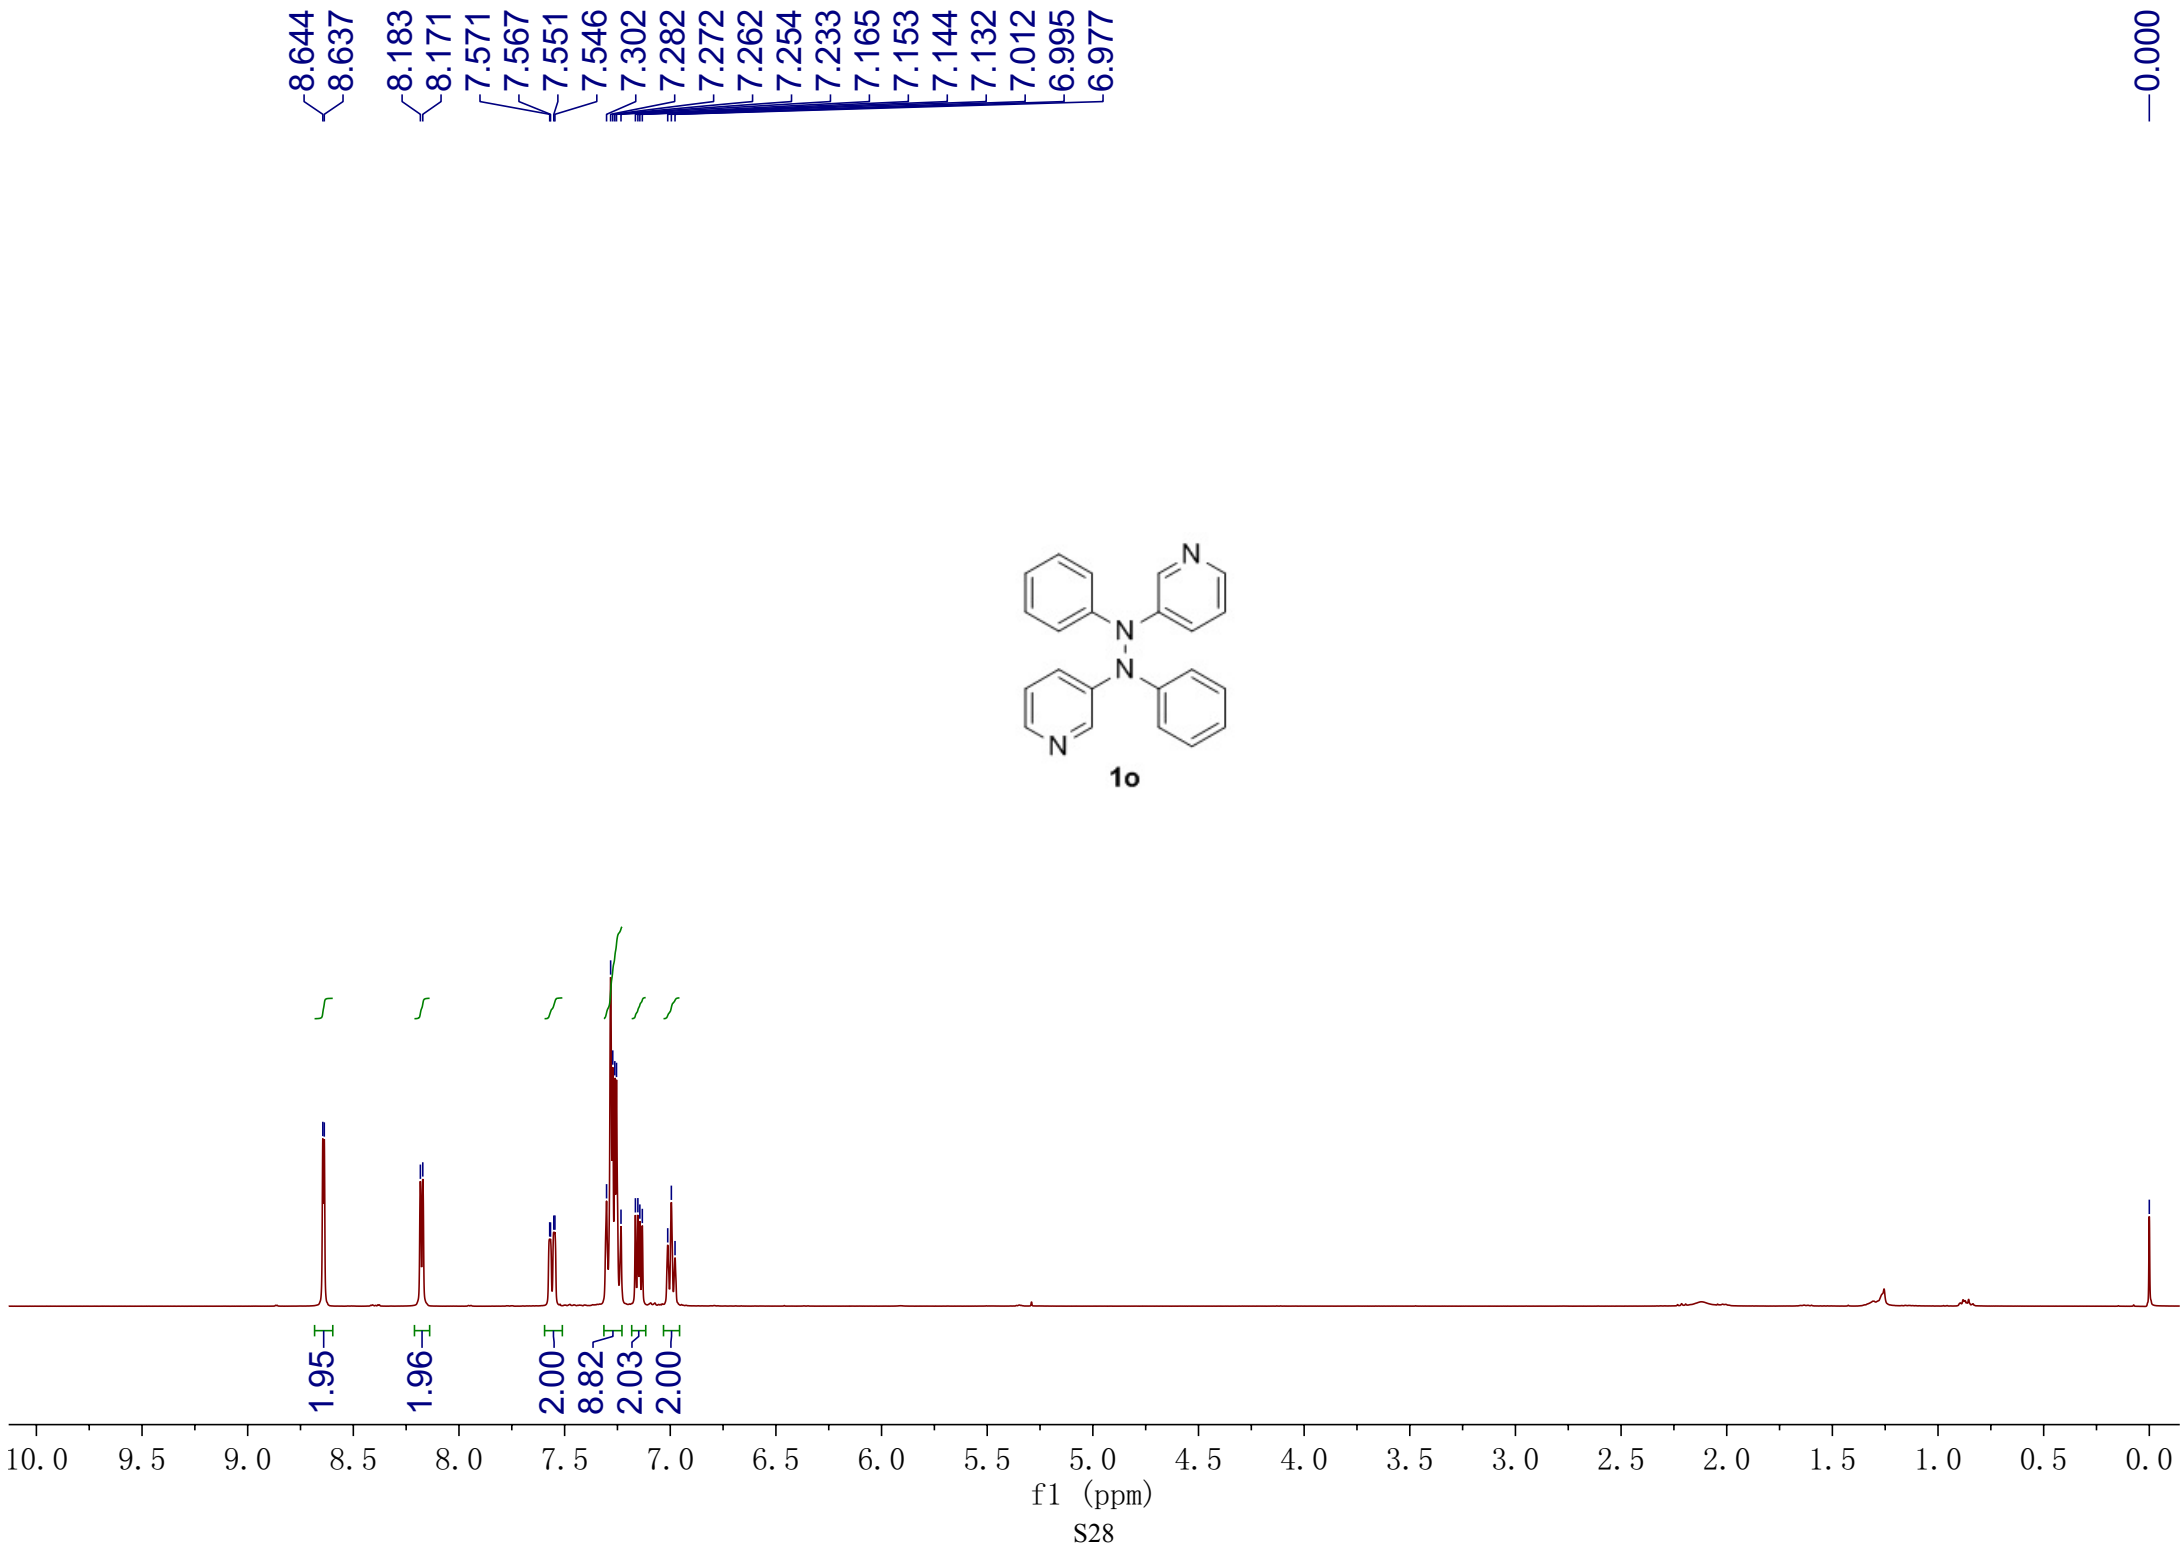

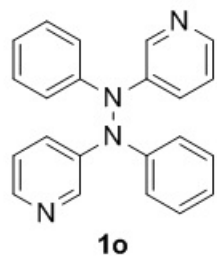

143.5  
142.1  
140.0  
139.8  
129.6  
124.3  
123.8  
123.6  
118.4

77.4  
77.1  
76.7

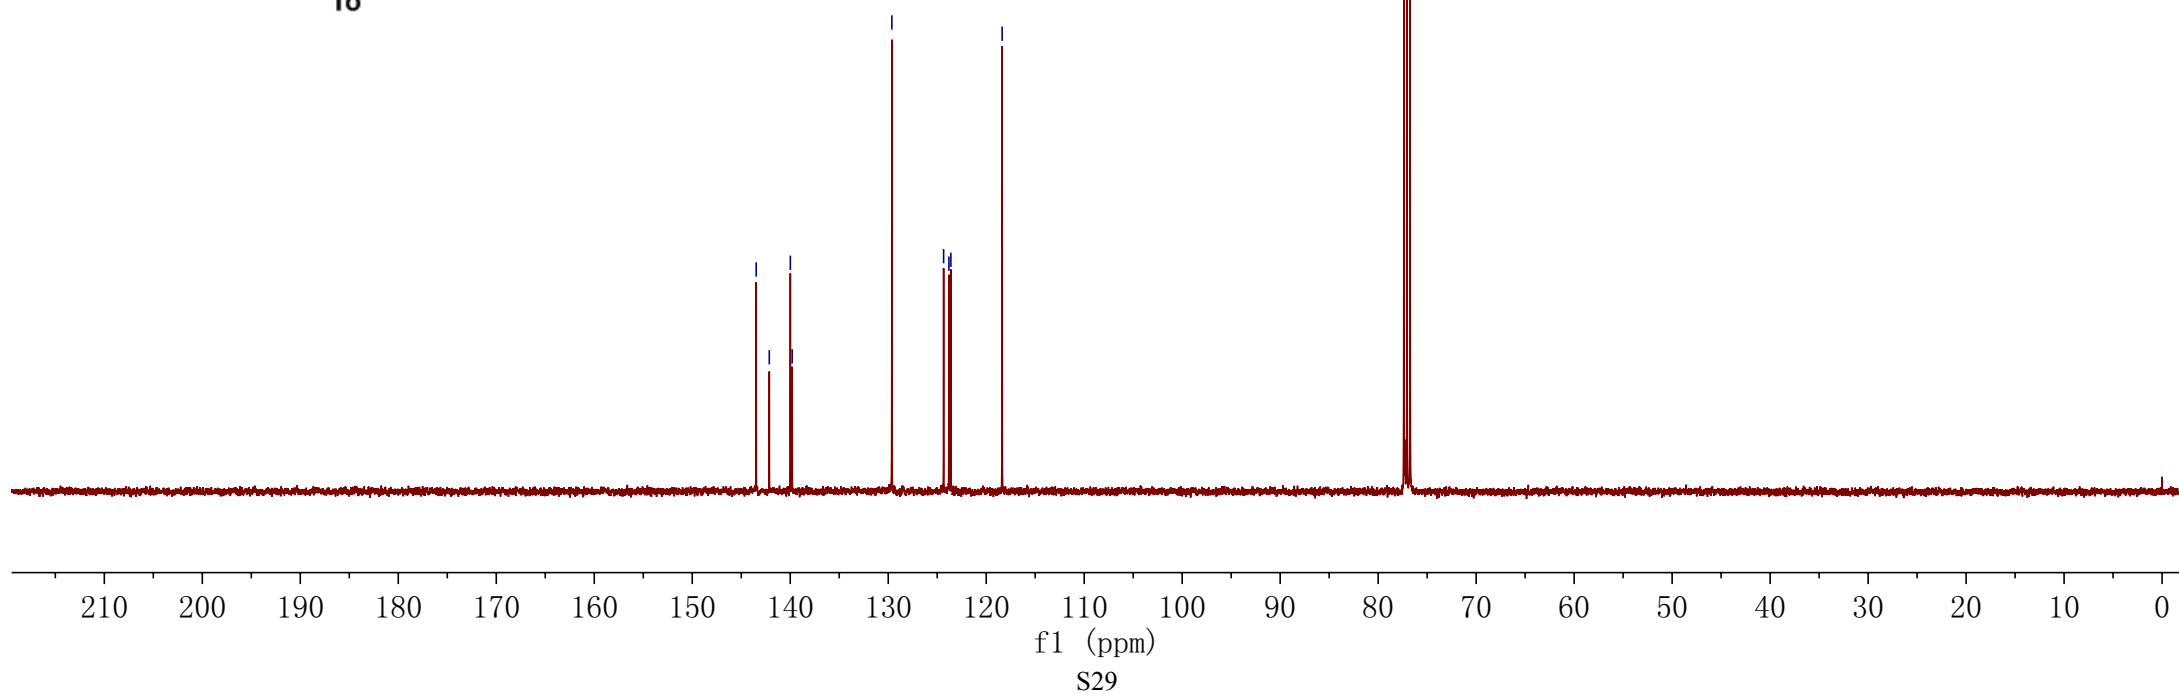

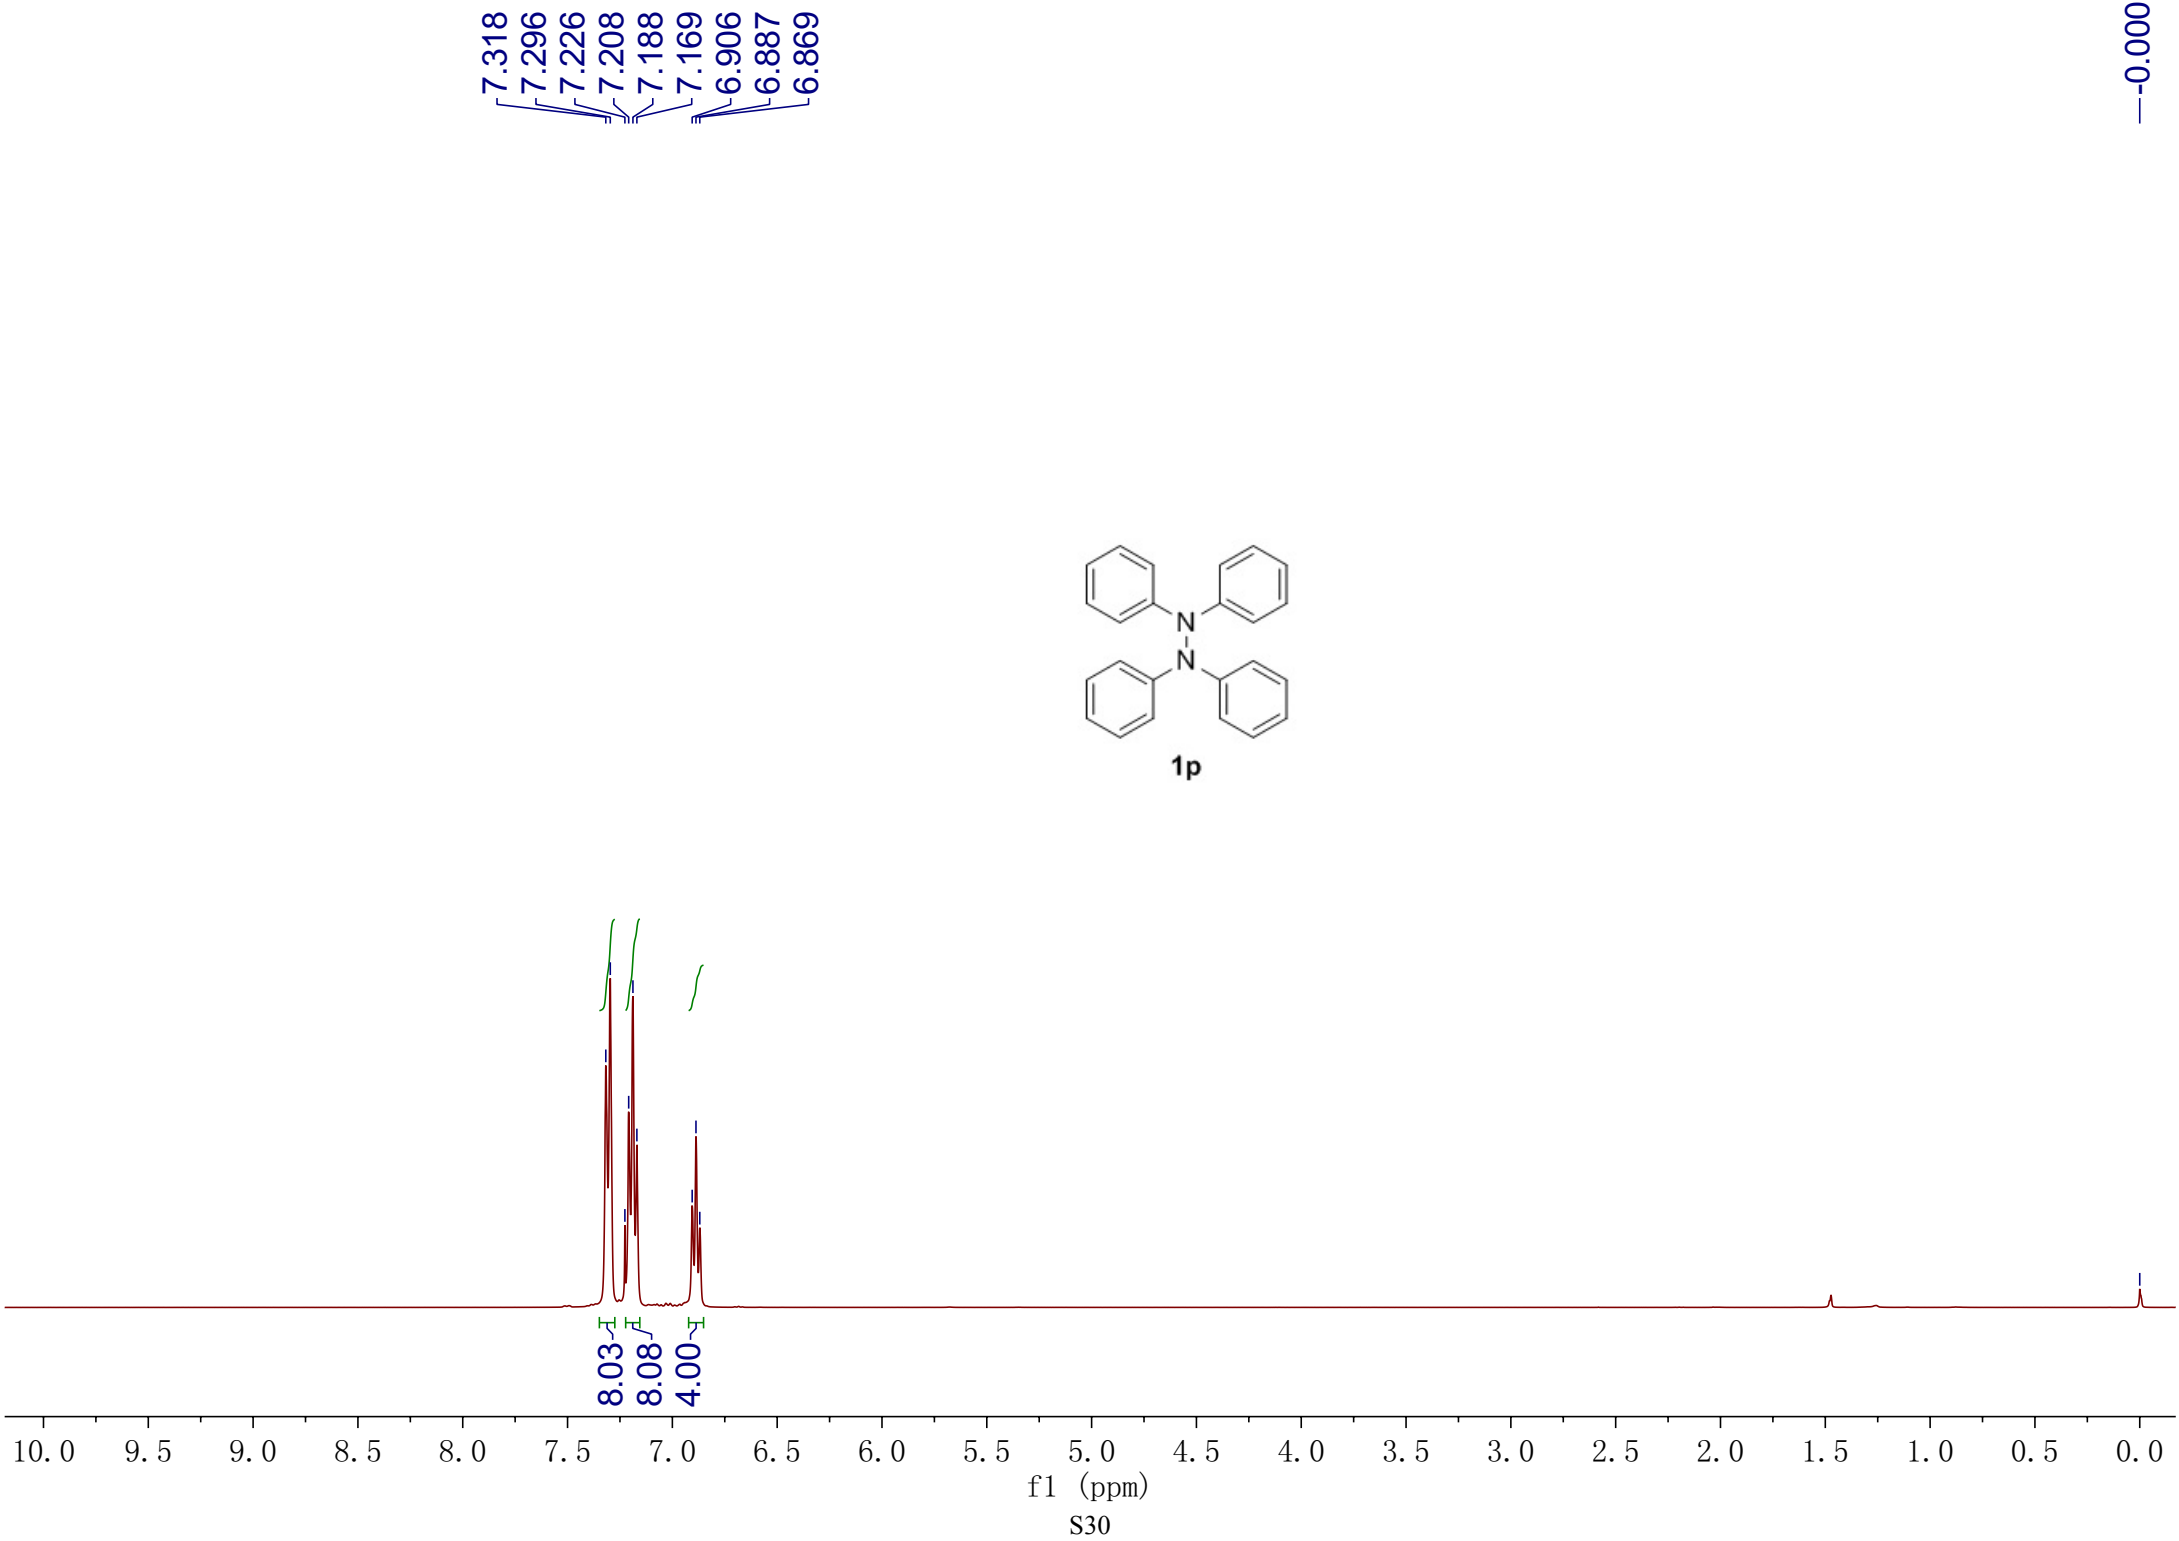

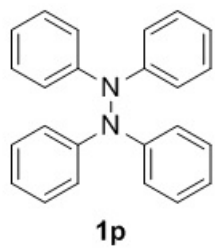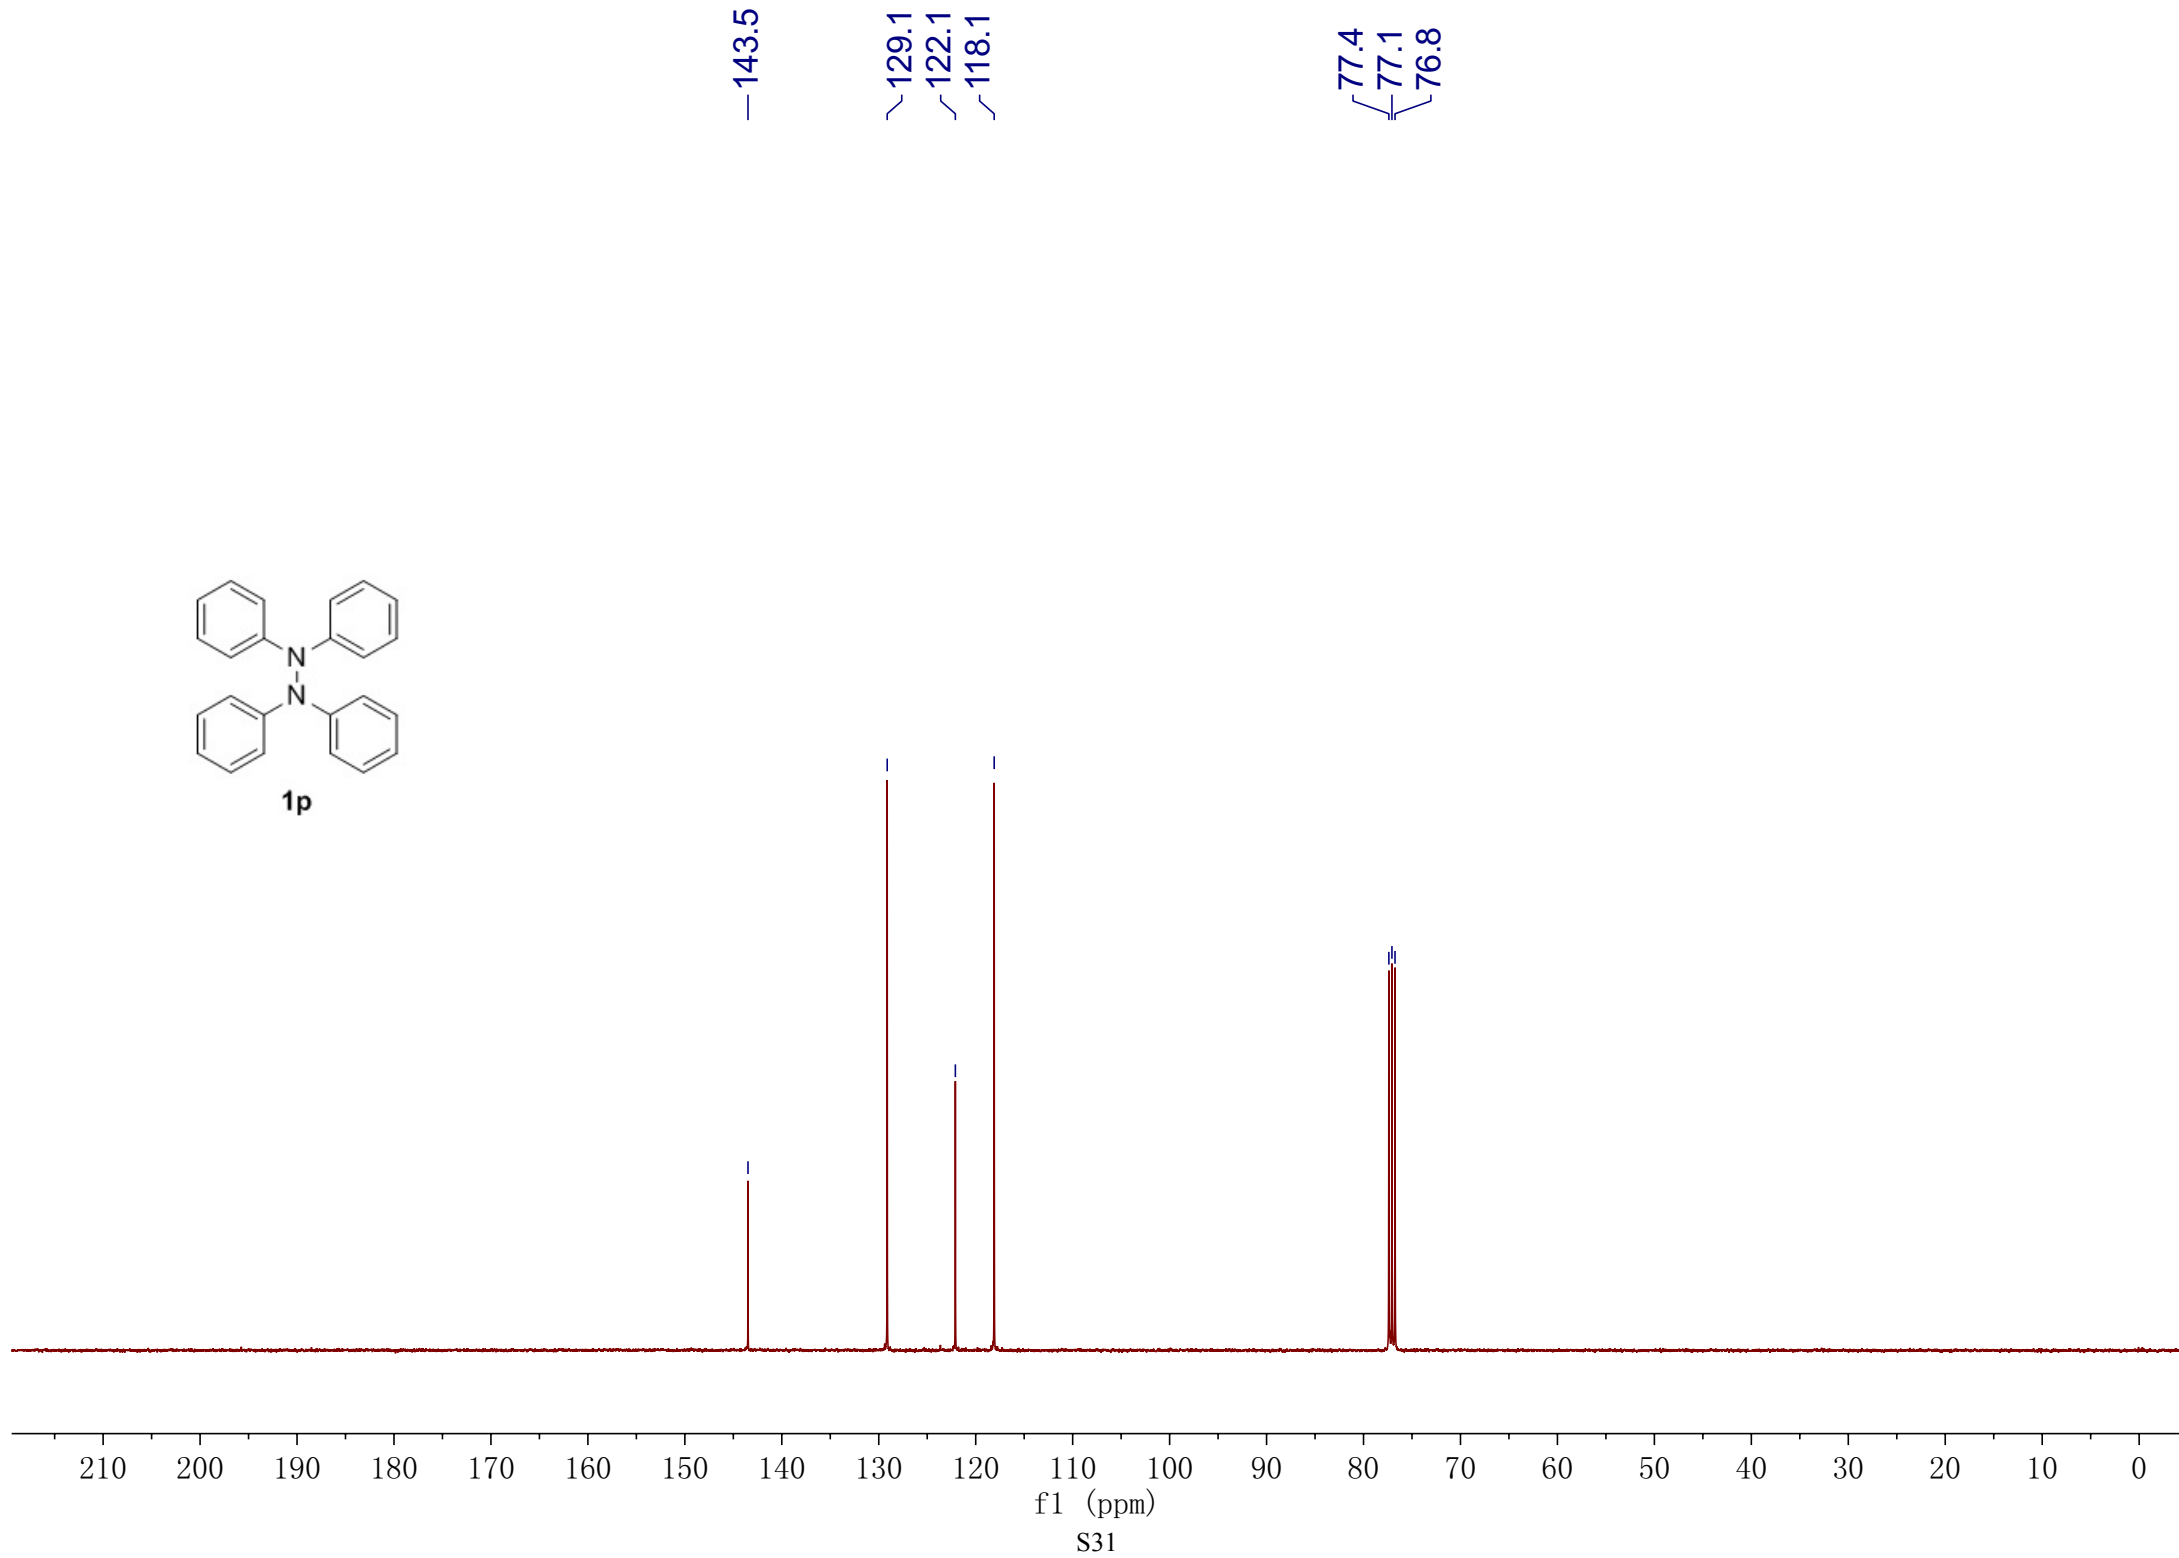

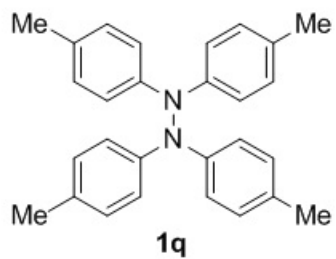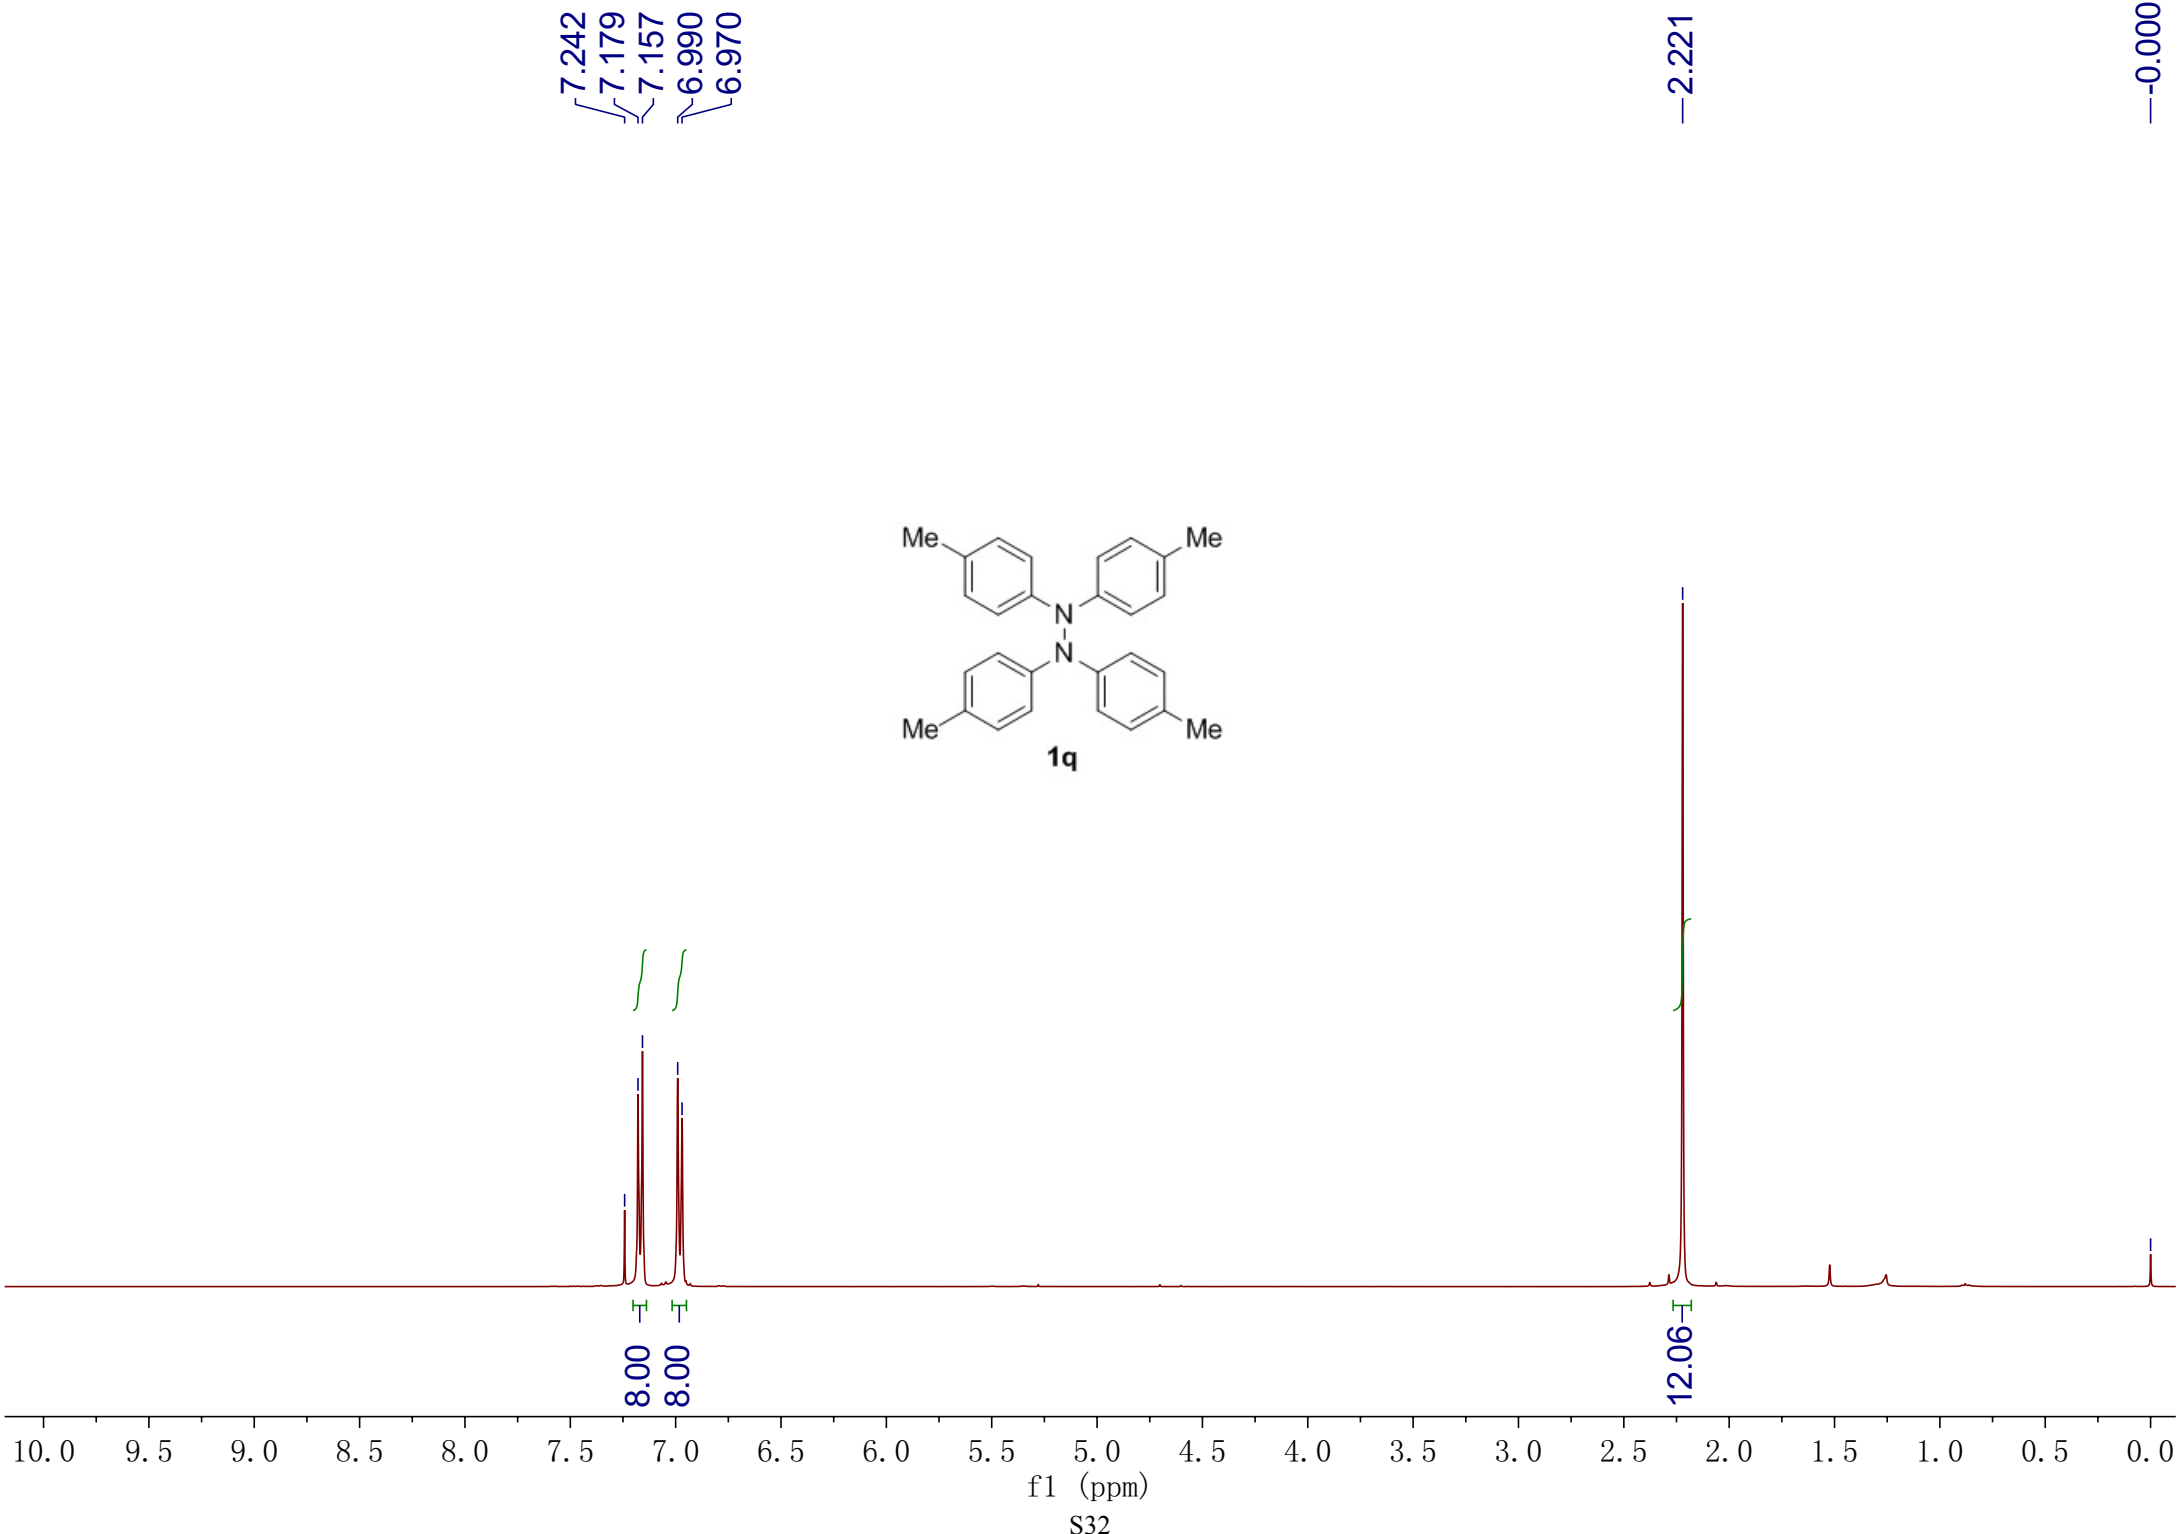



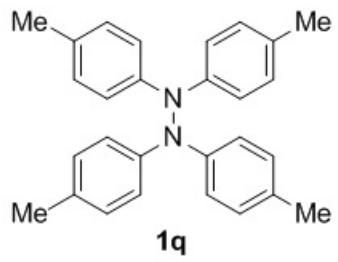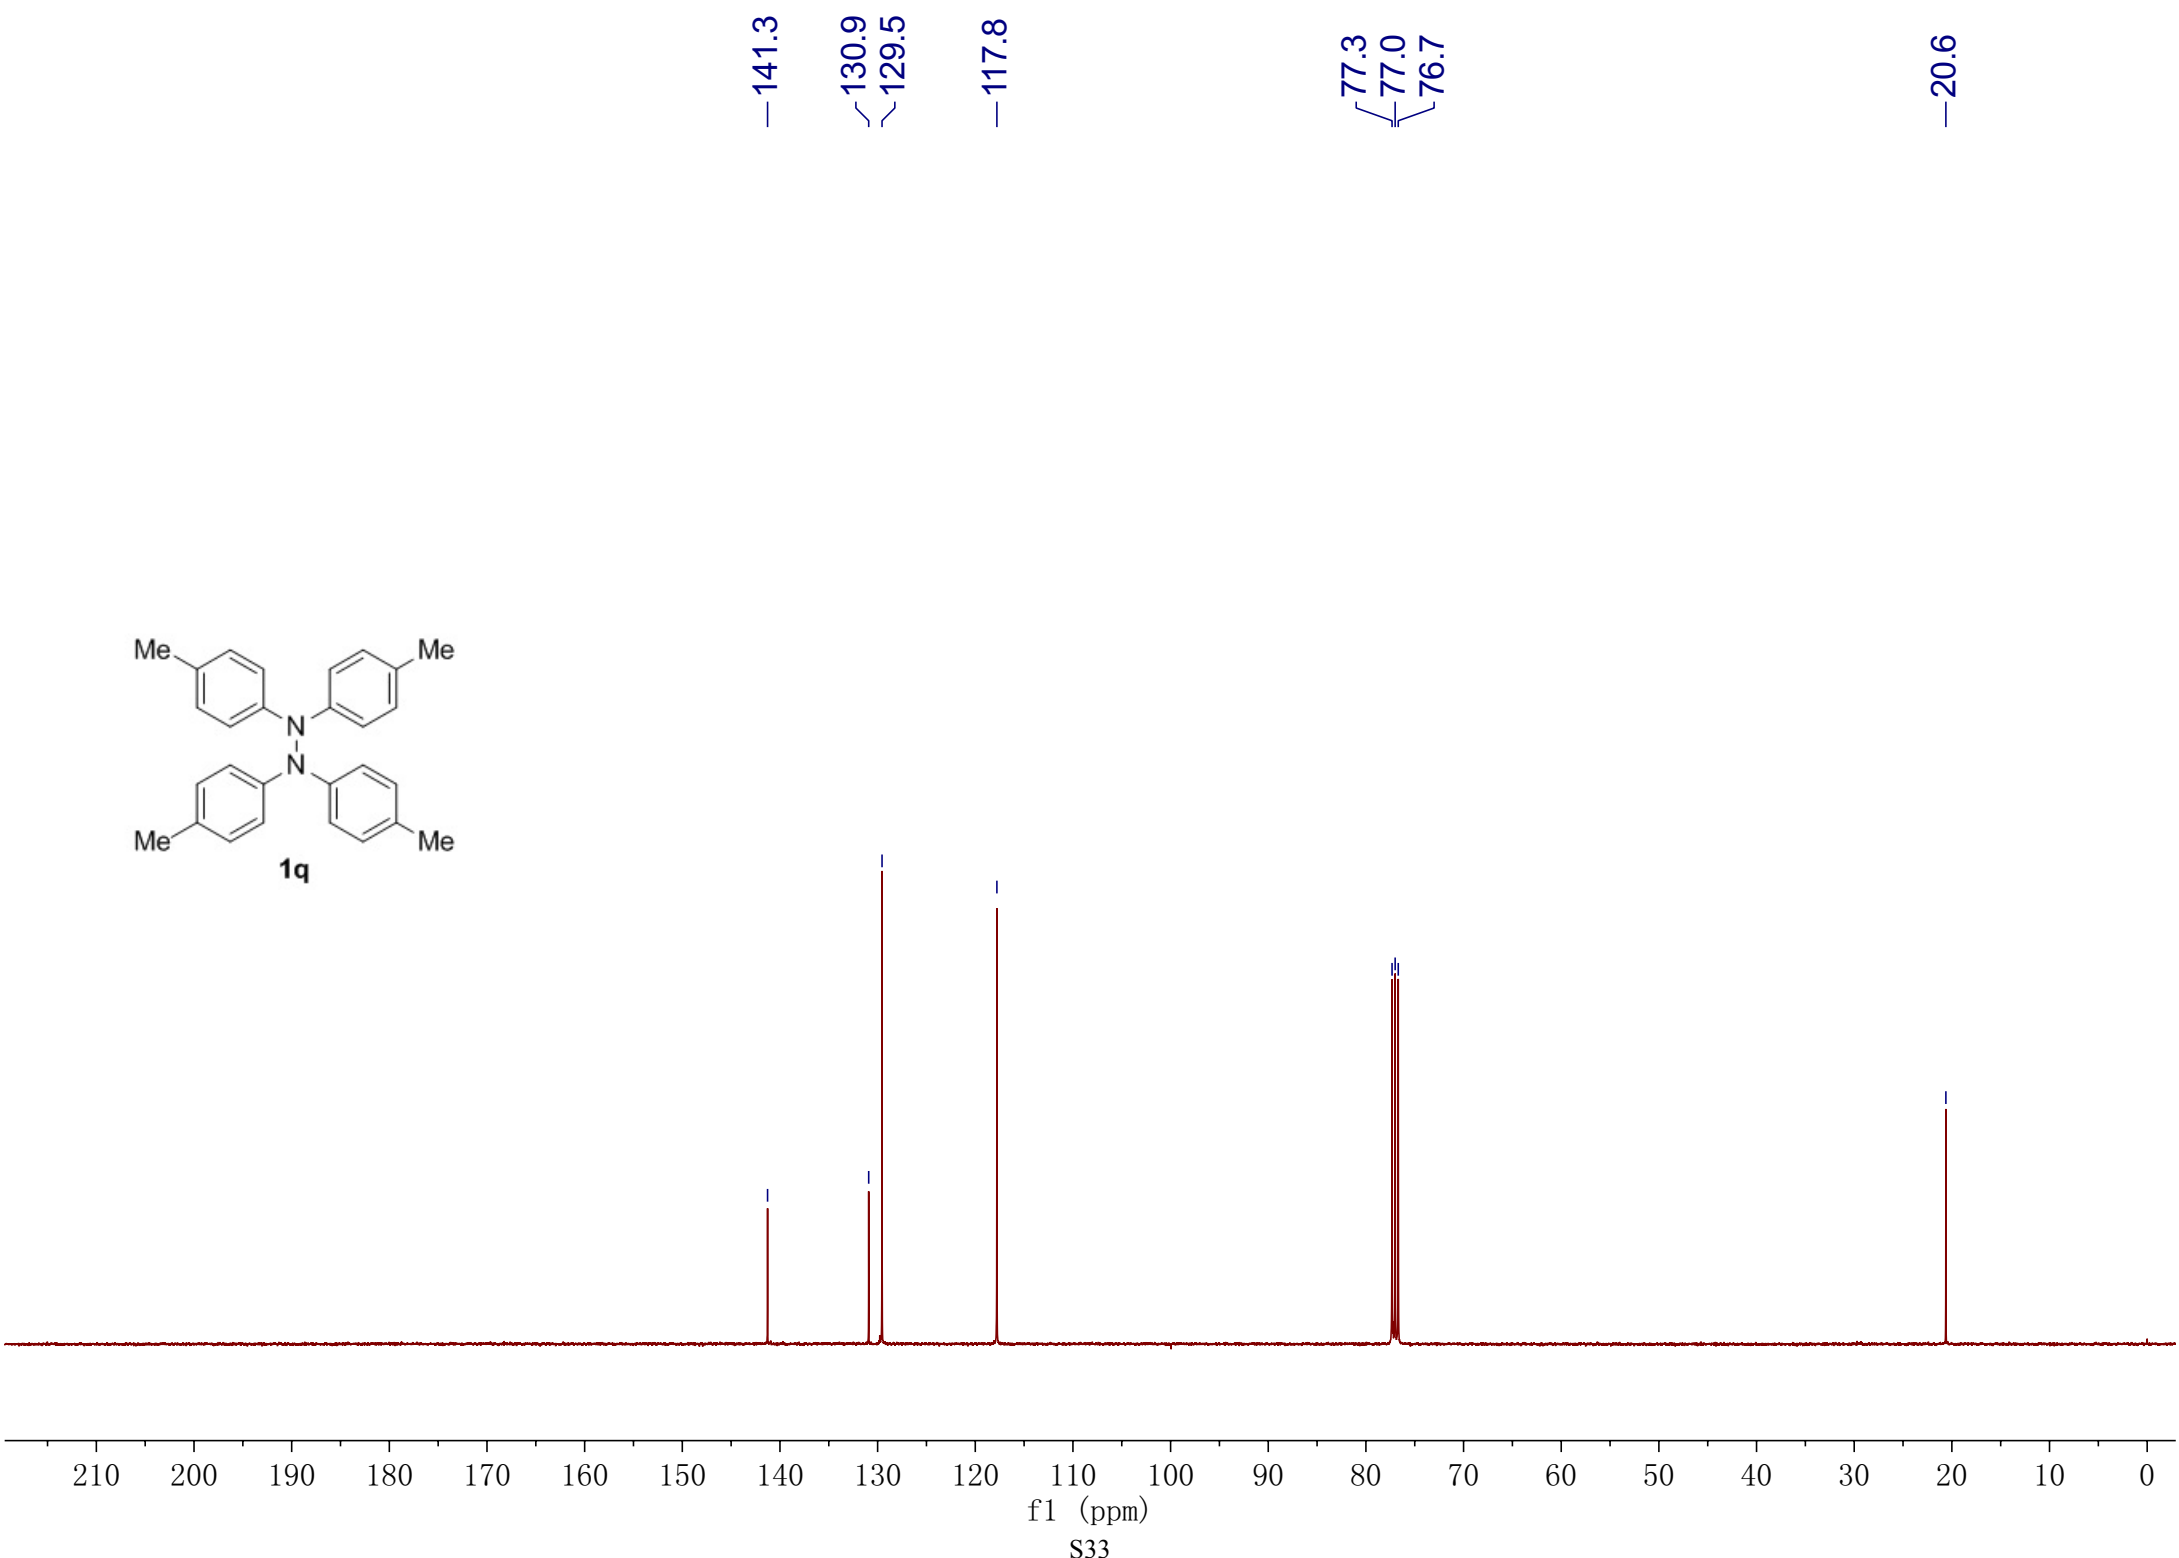

7.333  
7.325  
7.320  
7.308  
7.303  
7.295  
7.258  
7.102  
7.095  
7.089  
7.077  
7.072  
7.064

---0.000

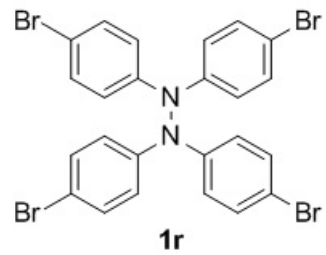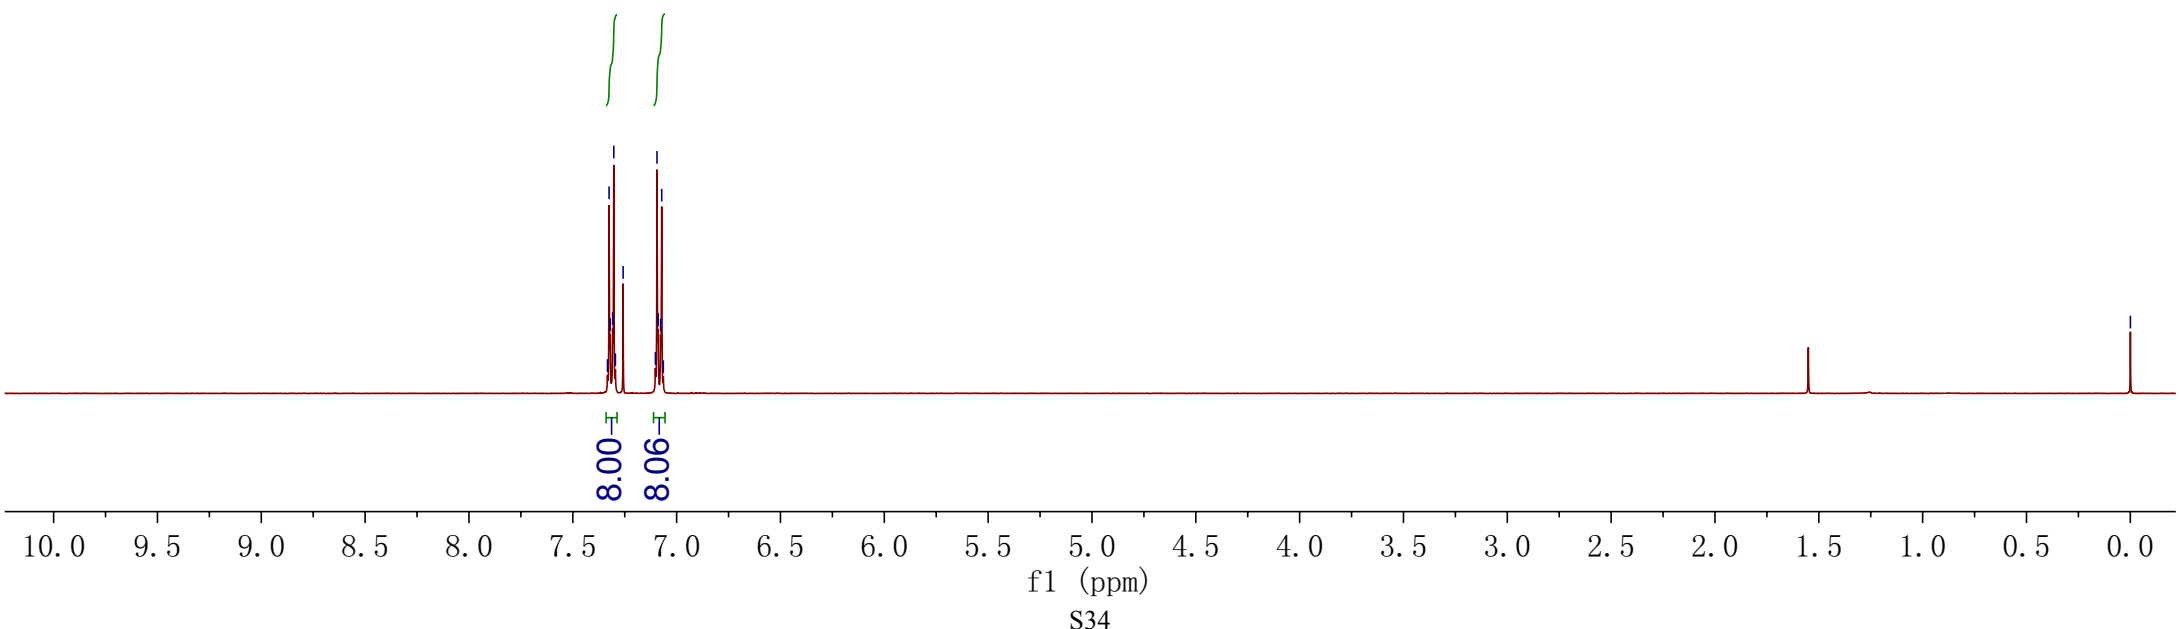

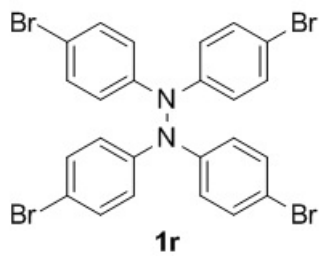

—141.6

—132.4

—119.6

—115.1

77.3  
77.0  
76.7

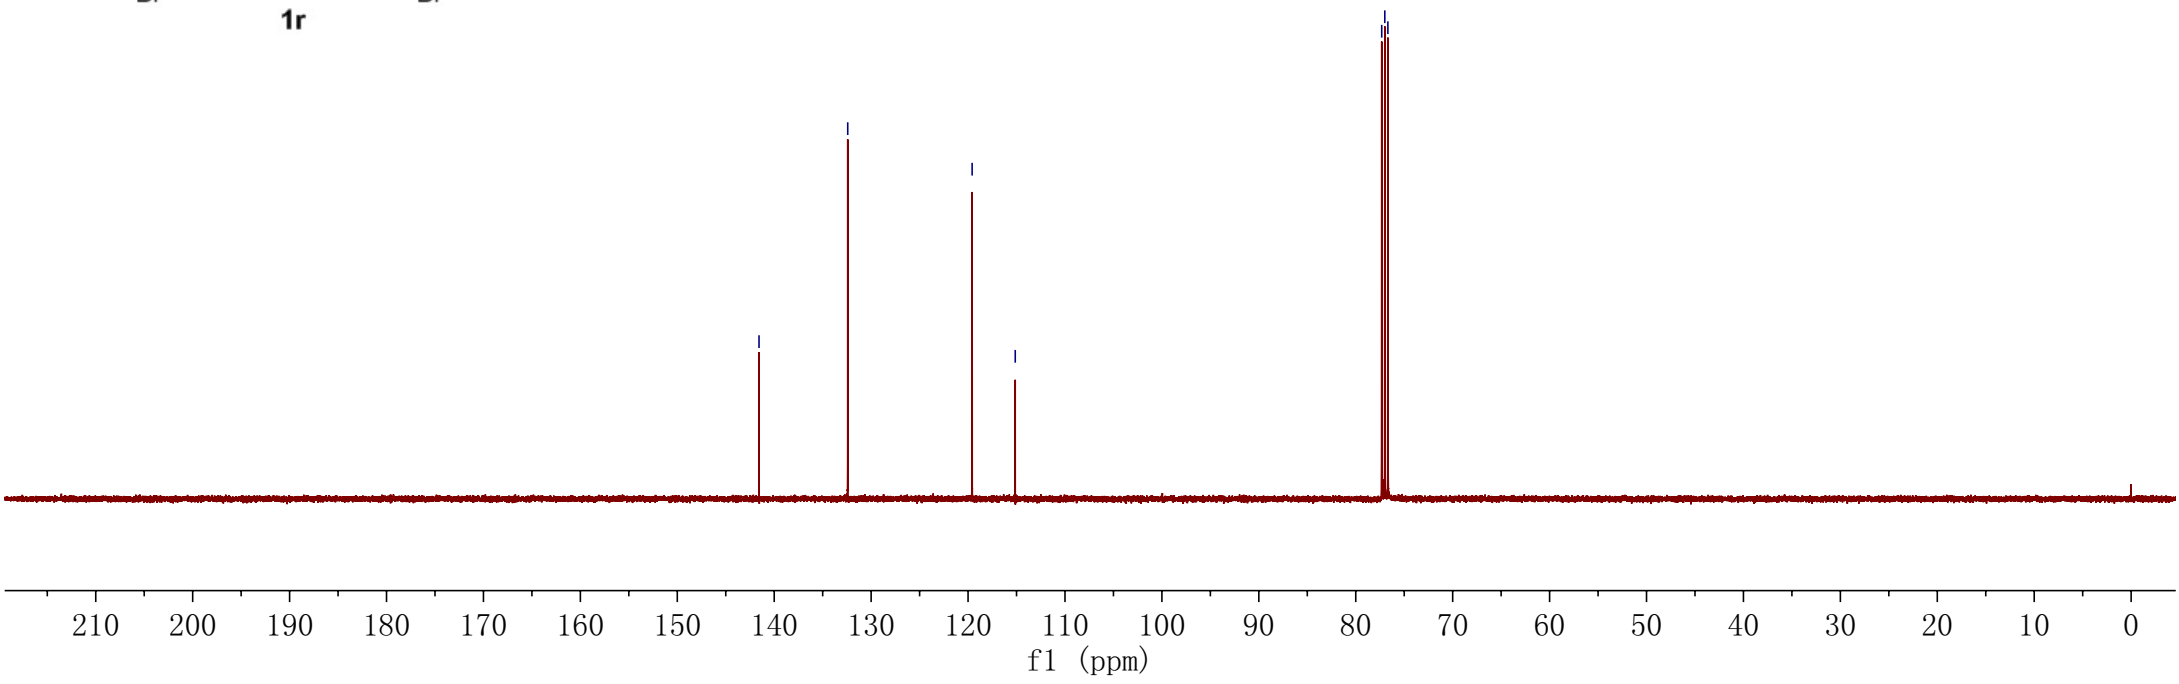

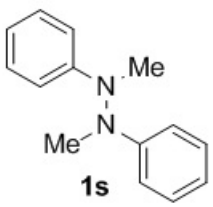

7.276  
7.271  
7.258  
7.254  
7.252  
7.241  
7.236  
6.857  
6.854  
6.849  
6.835  
6.833  
6.818  
6.816  
6.800  
6.798

2.993

0.000

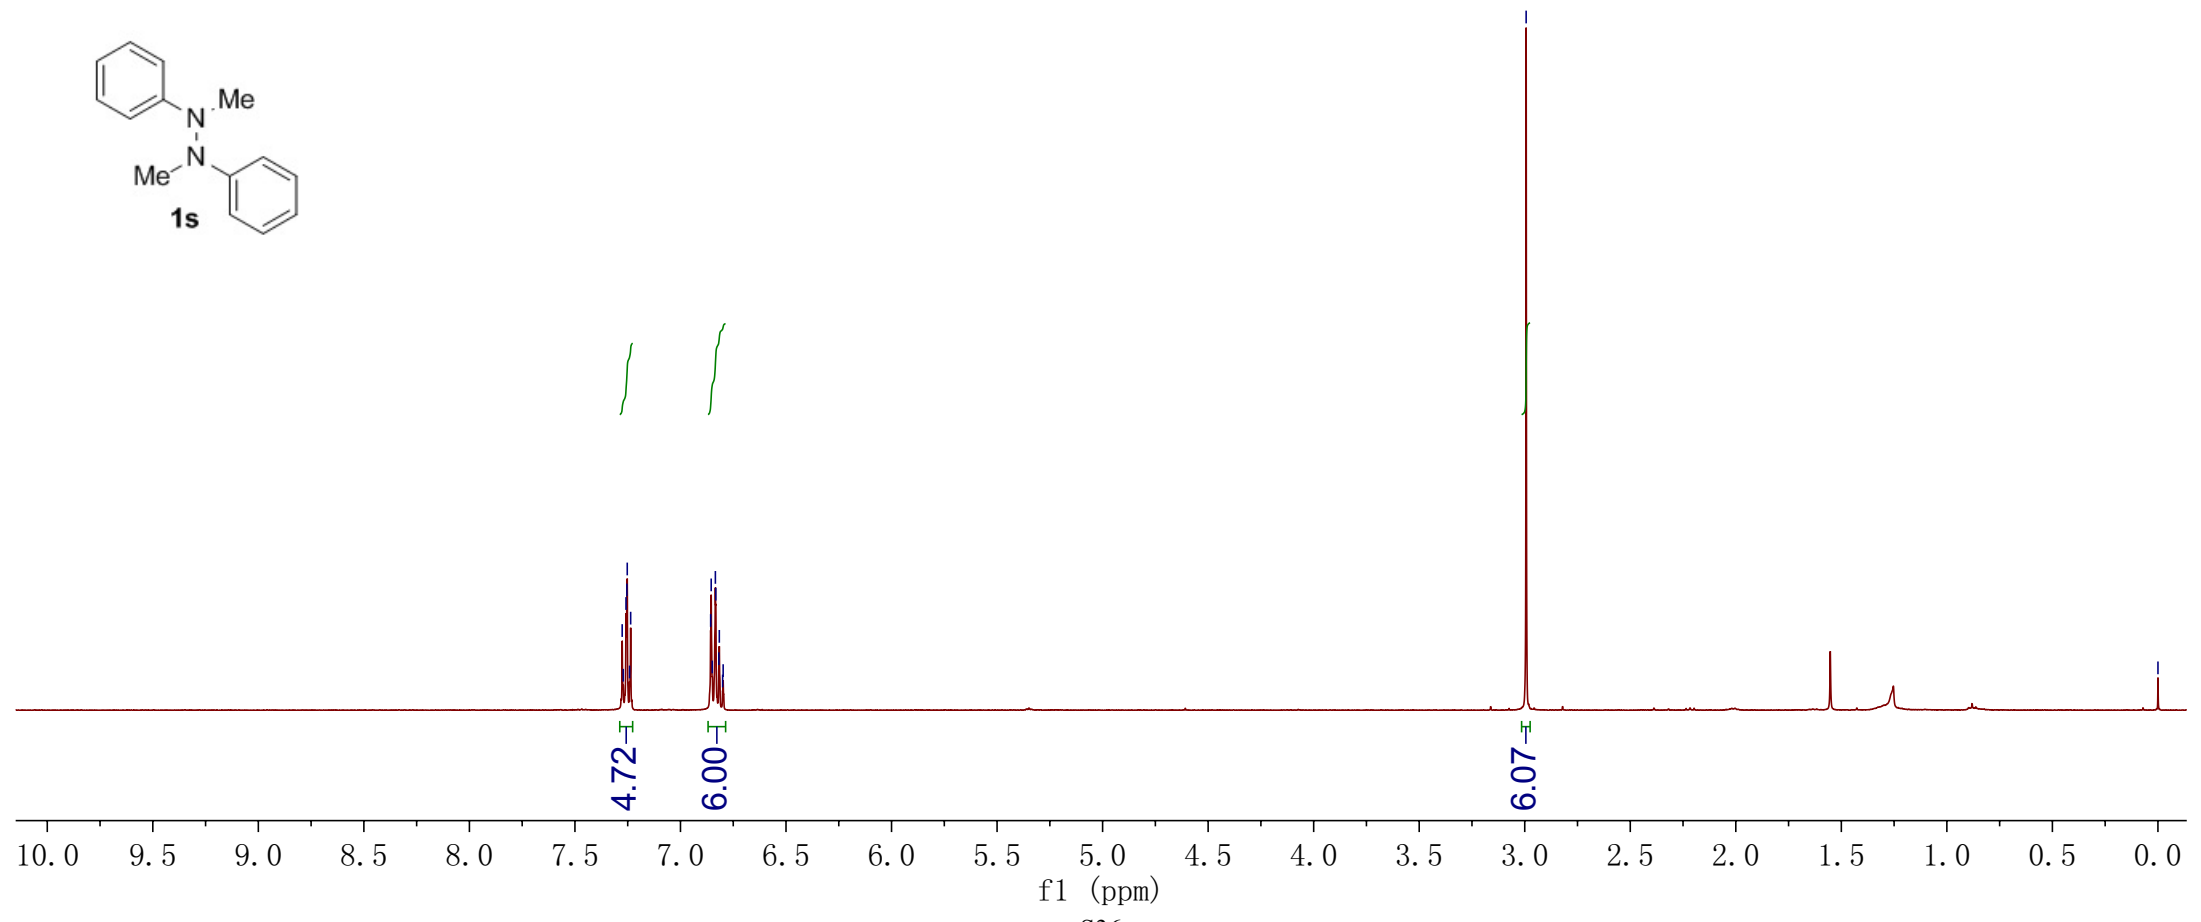

f1 (ppm)

S36

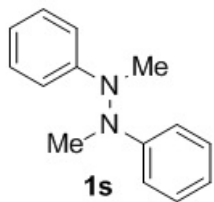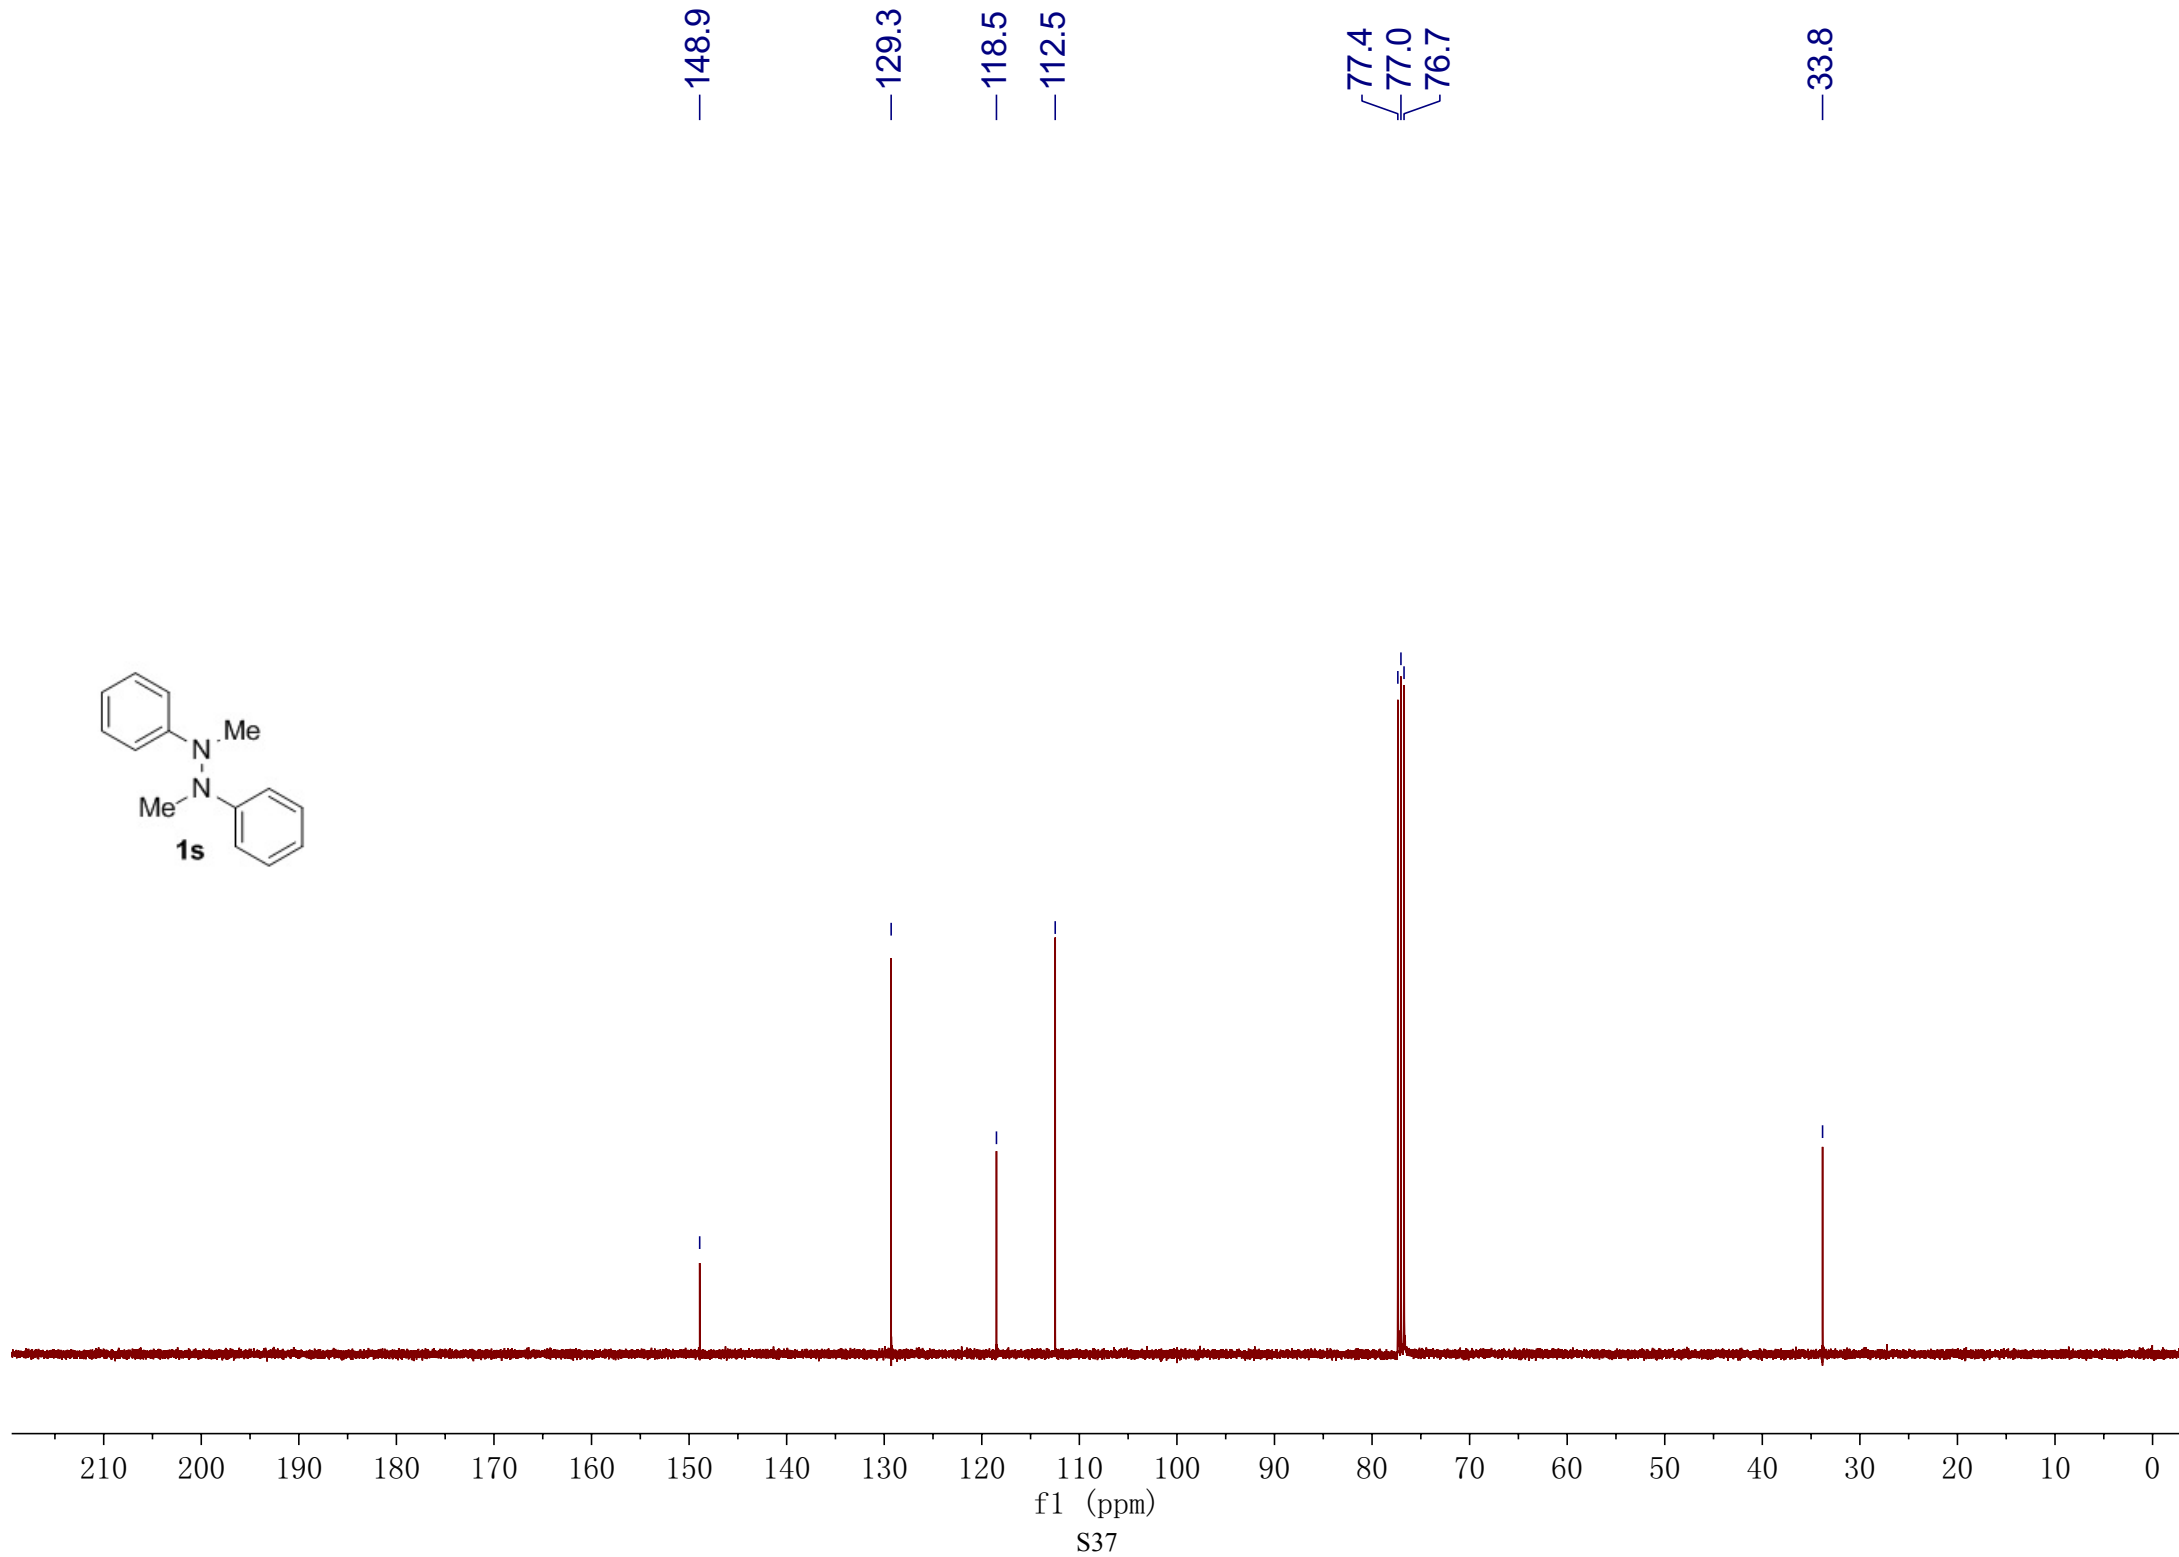

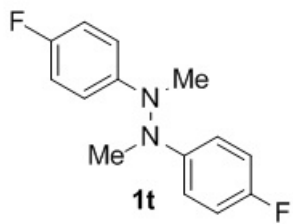

7.254  
6.976  
6.970  
6.958  
6.953  
6.938  
6.932  
6.805  
6.799  
6.793  
6.788  
6.782  
6.776  
6.770

-2.909

-0.000

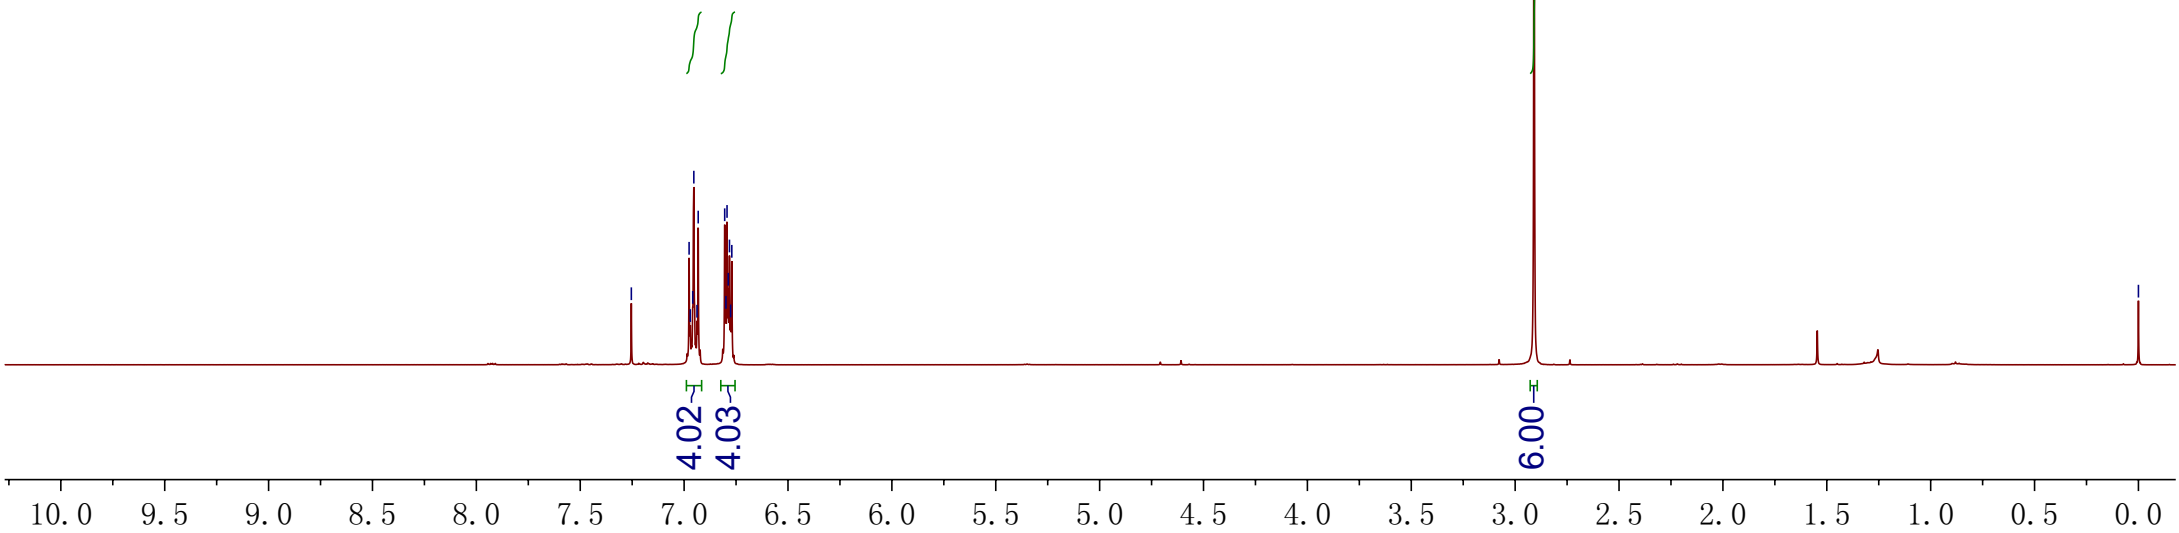

f1 (ppm)

S38

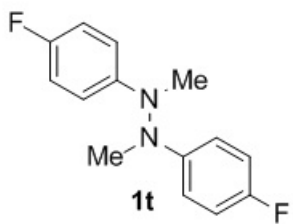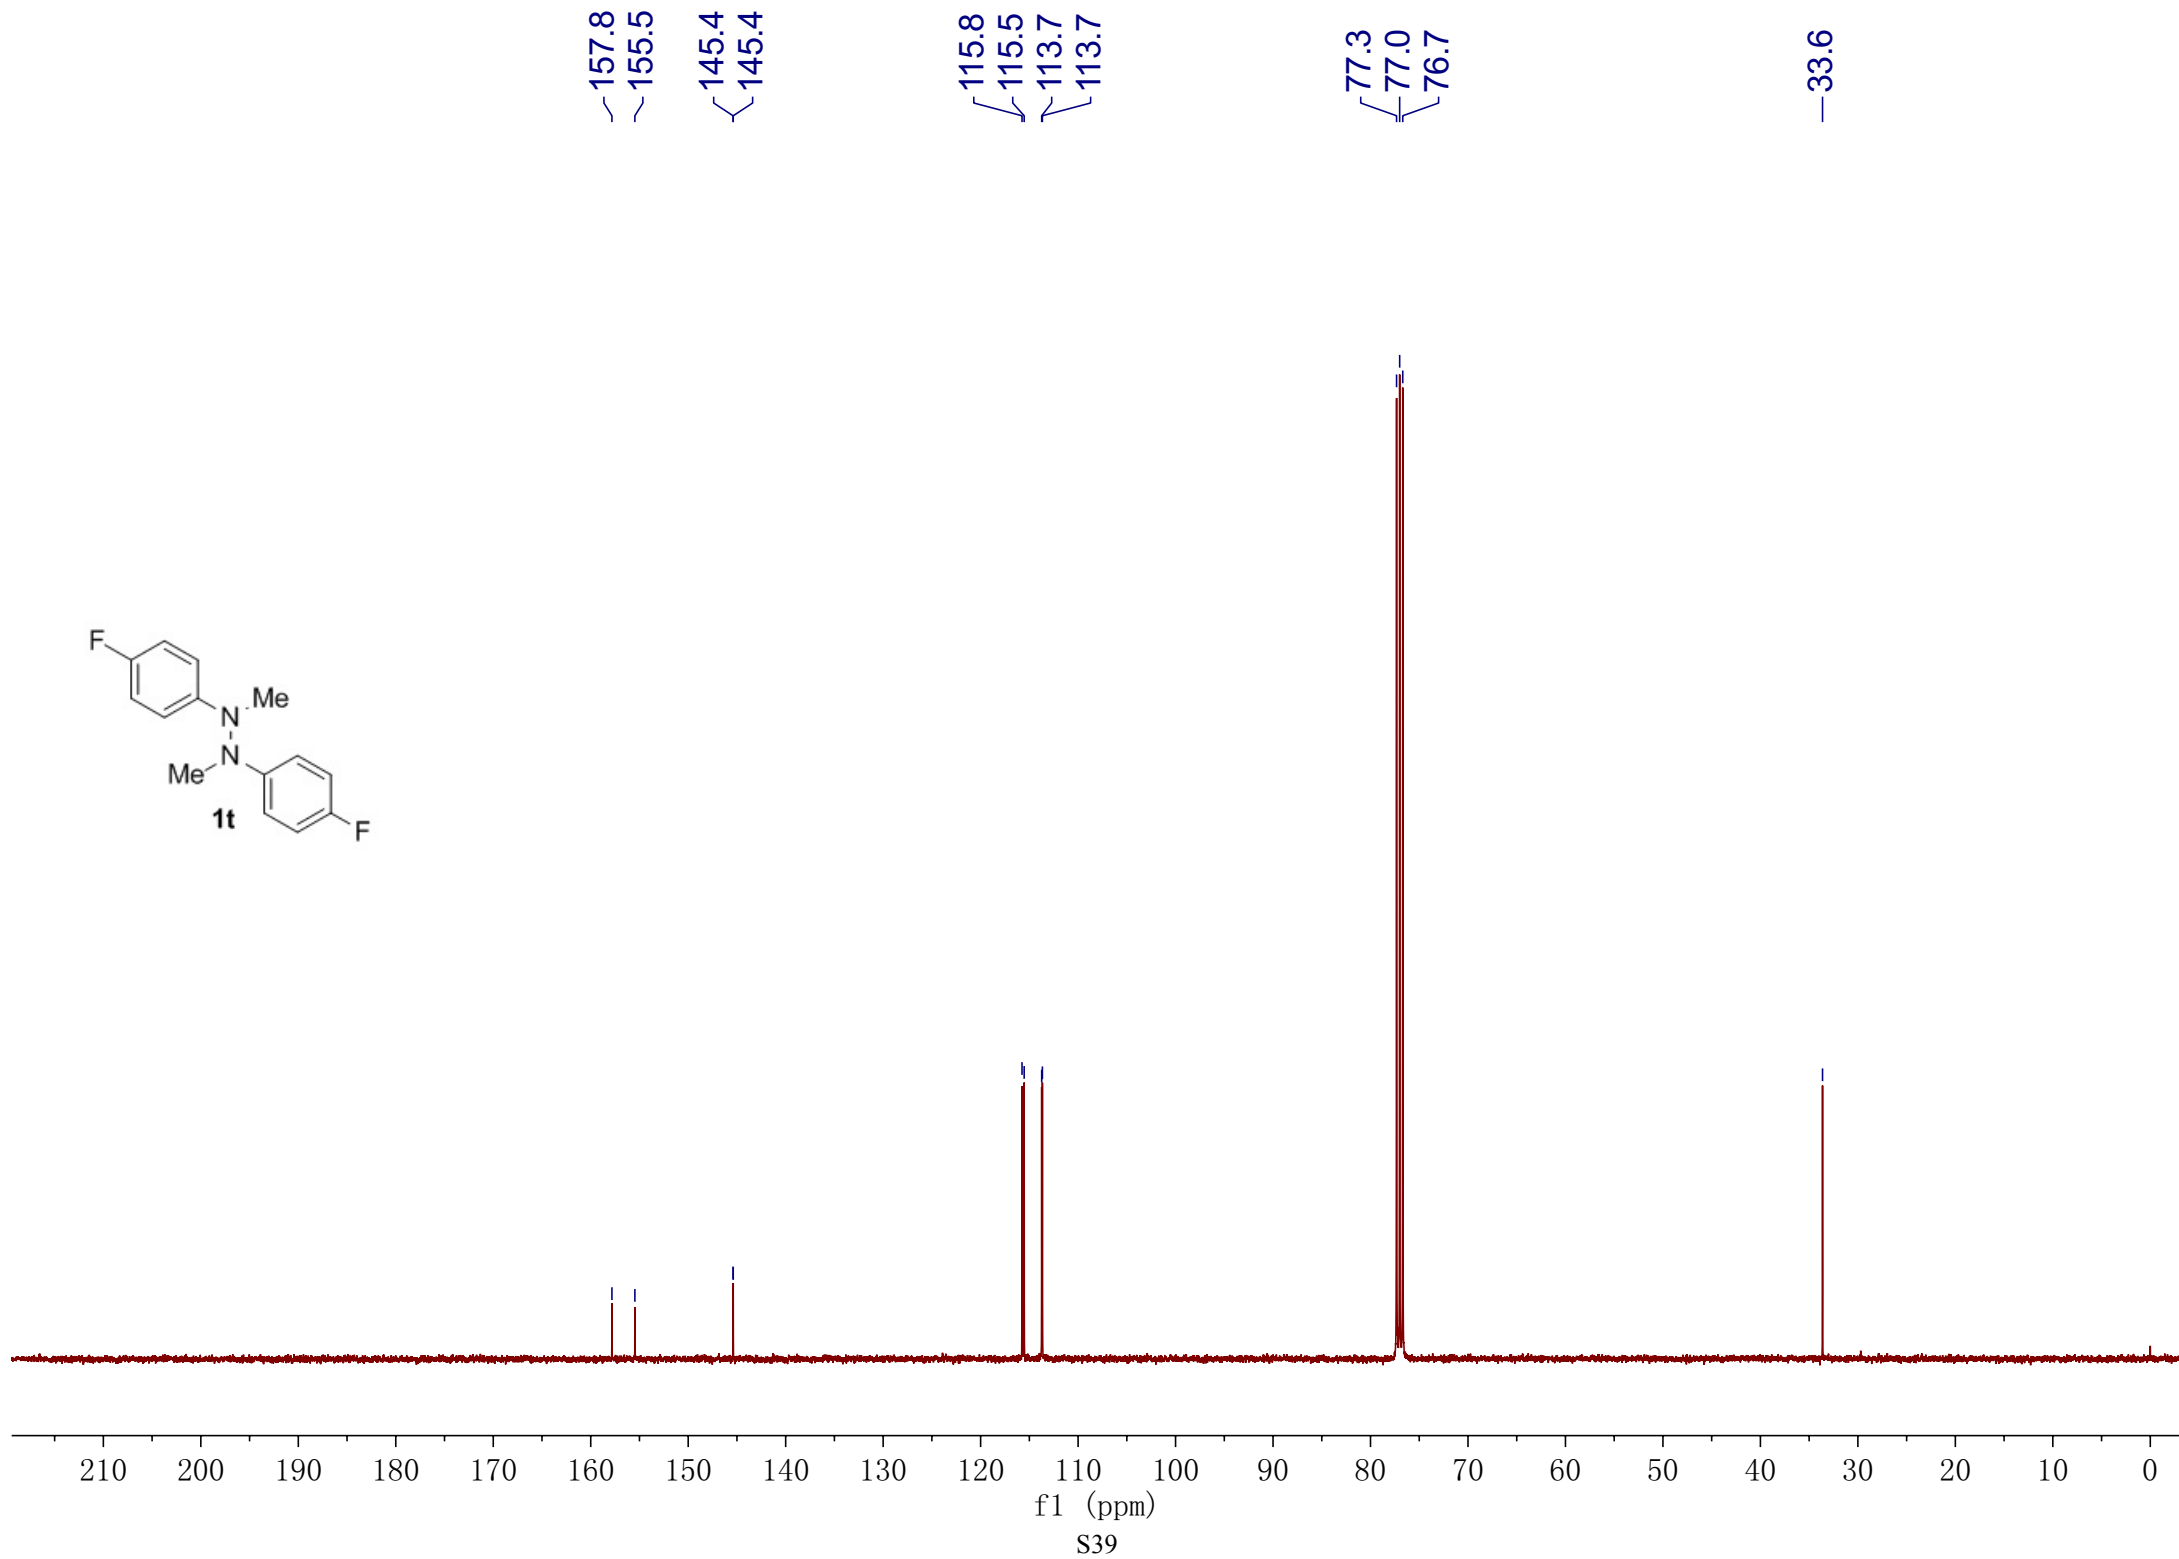

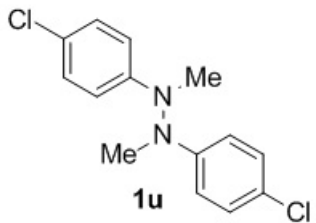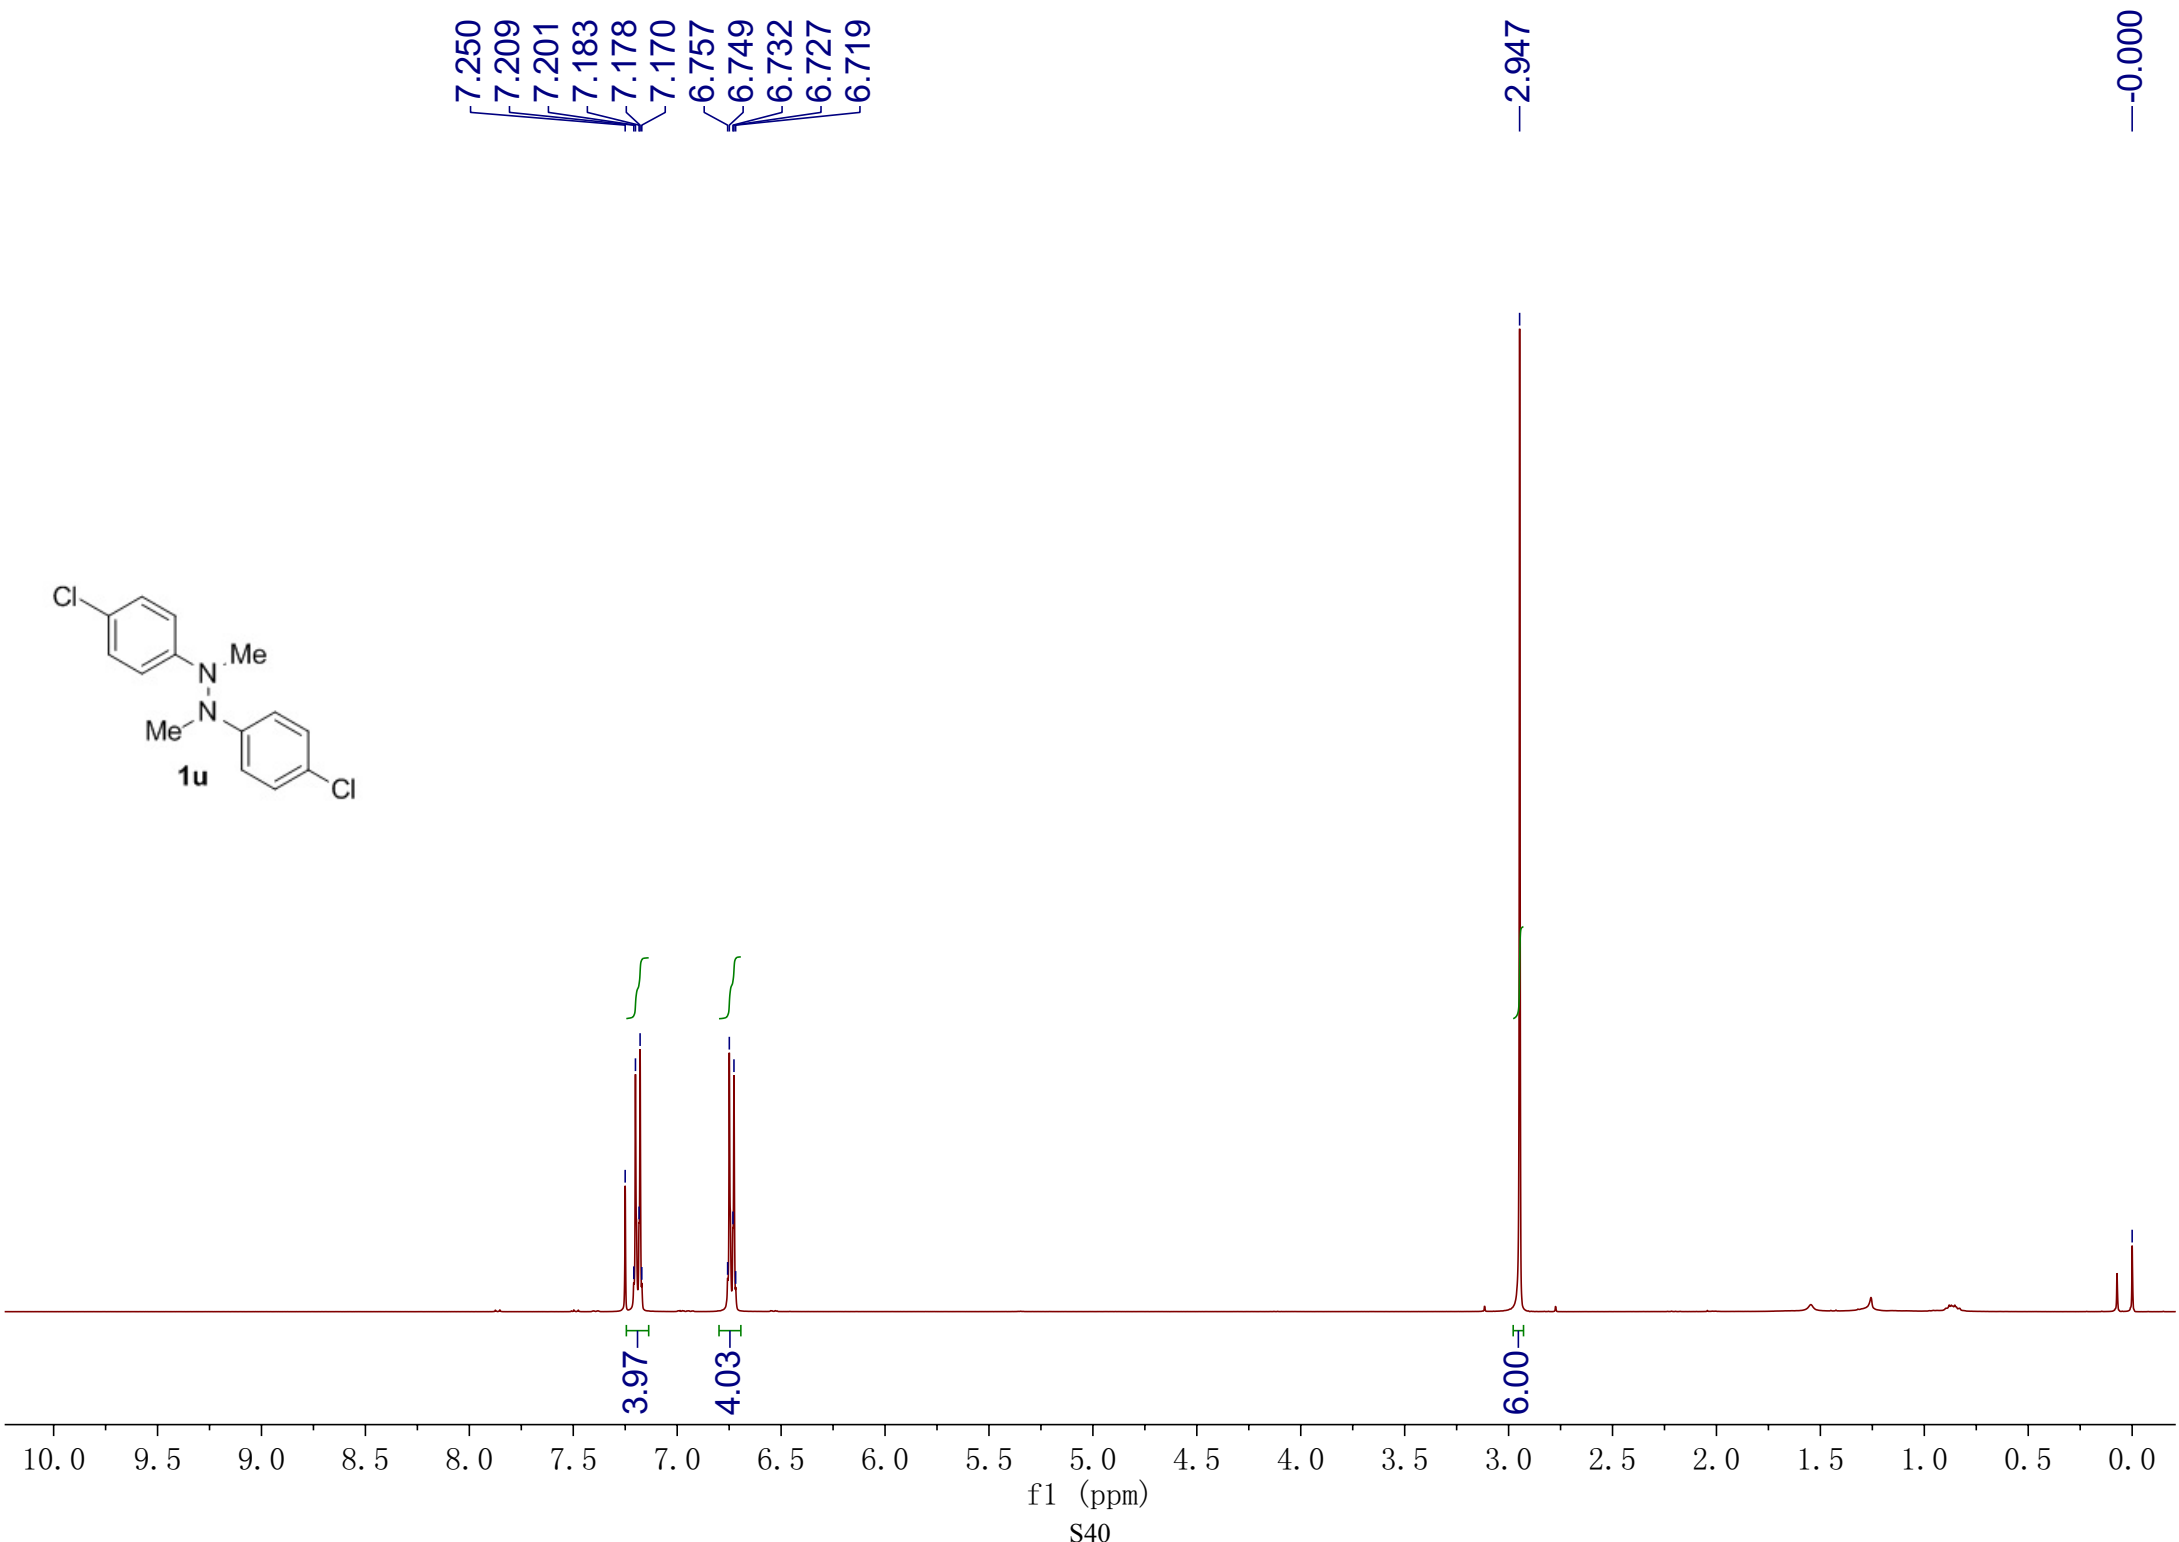



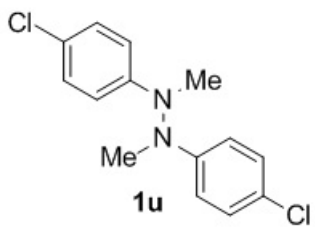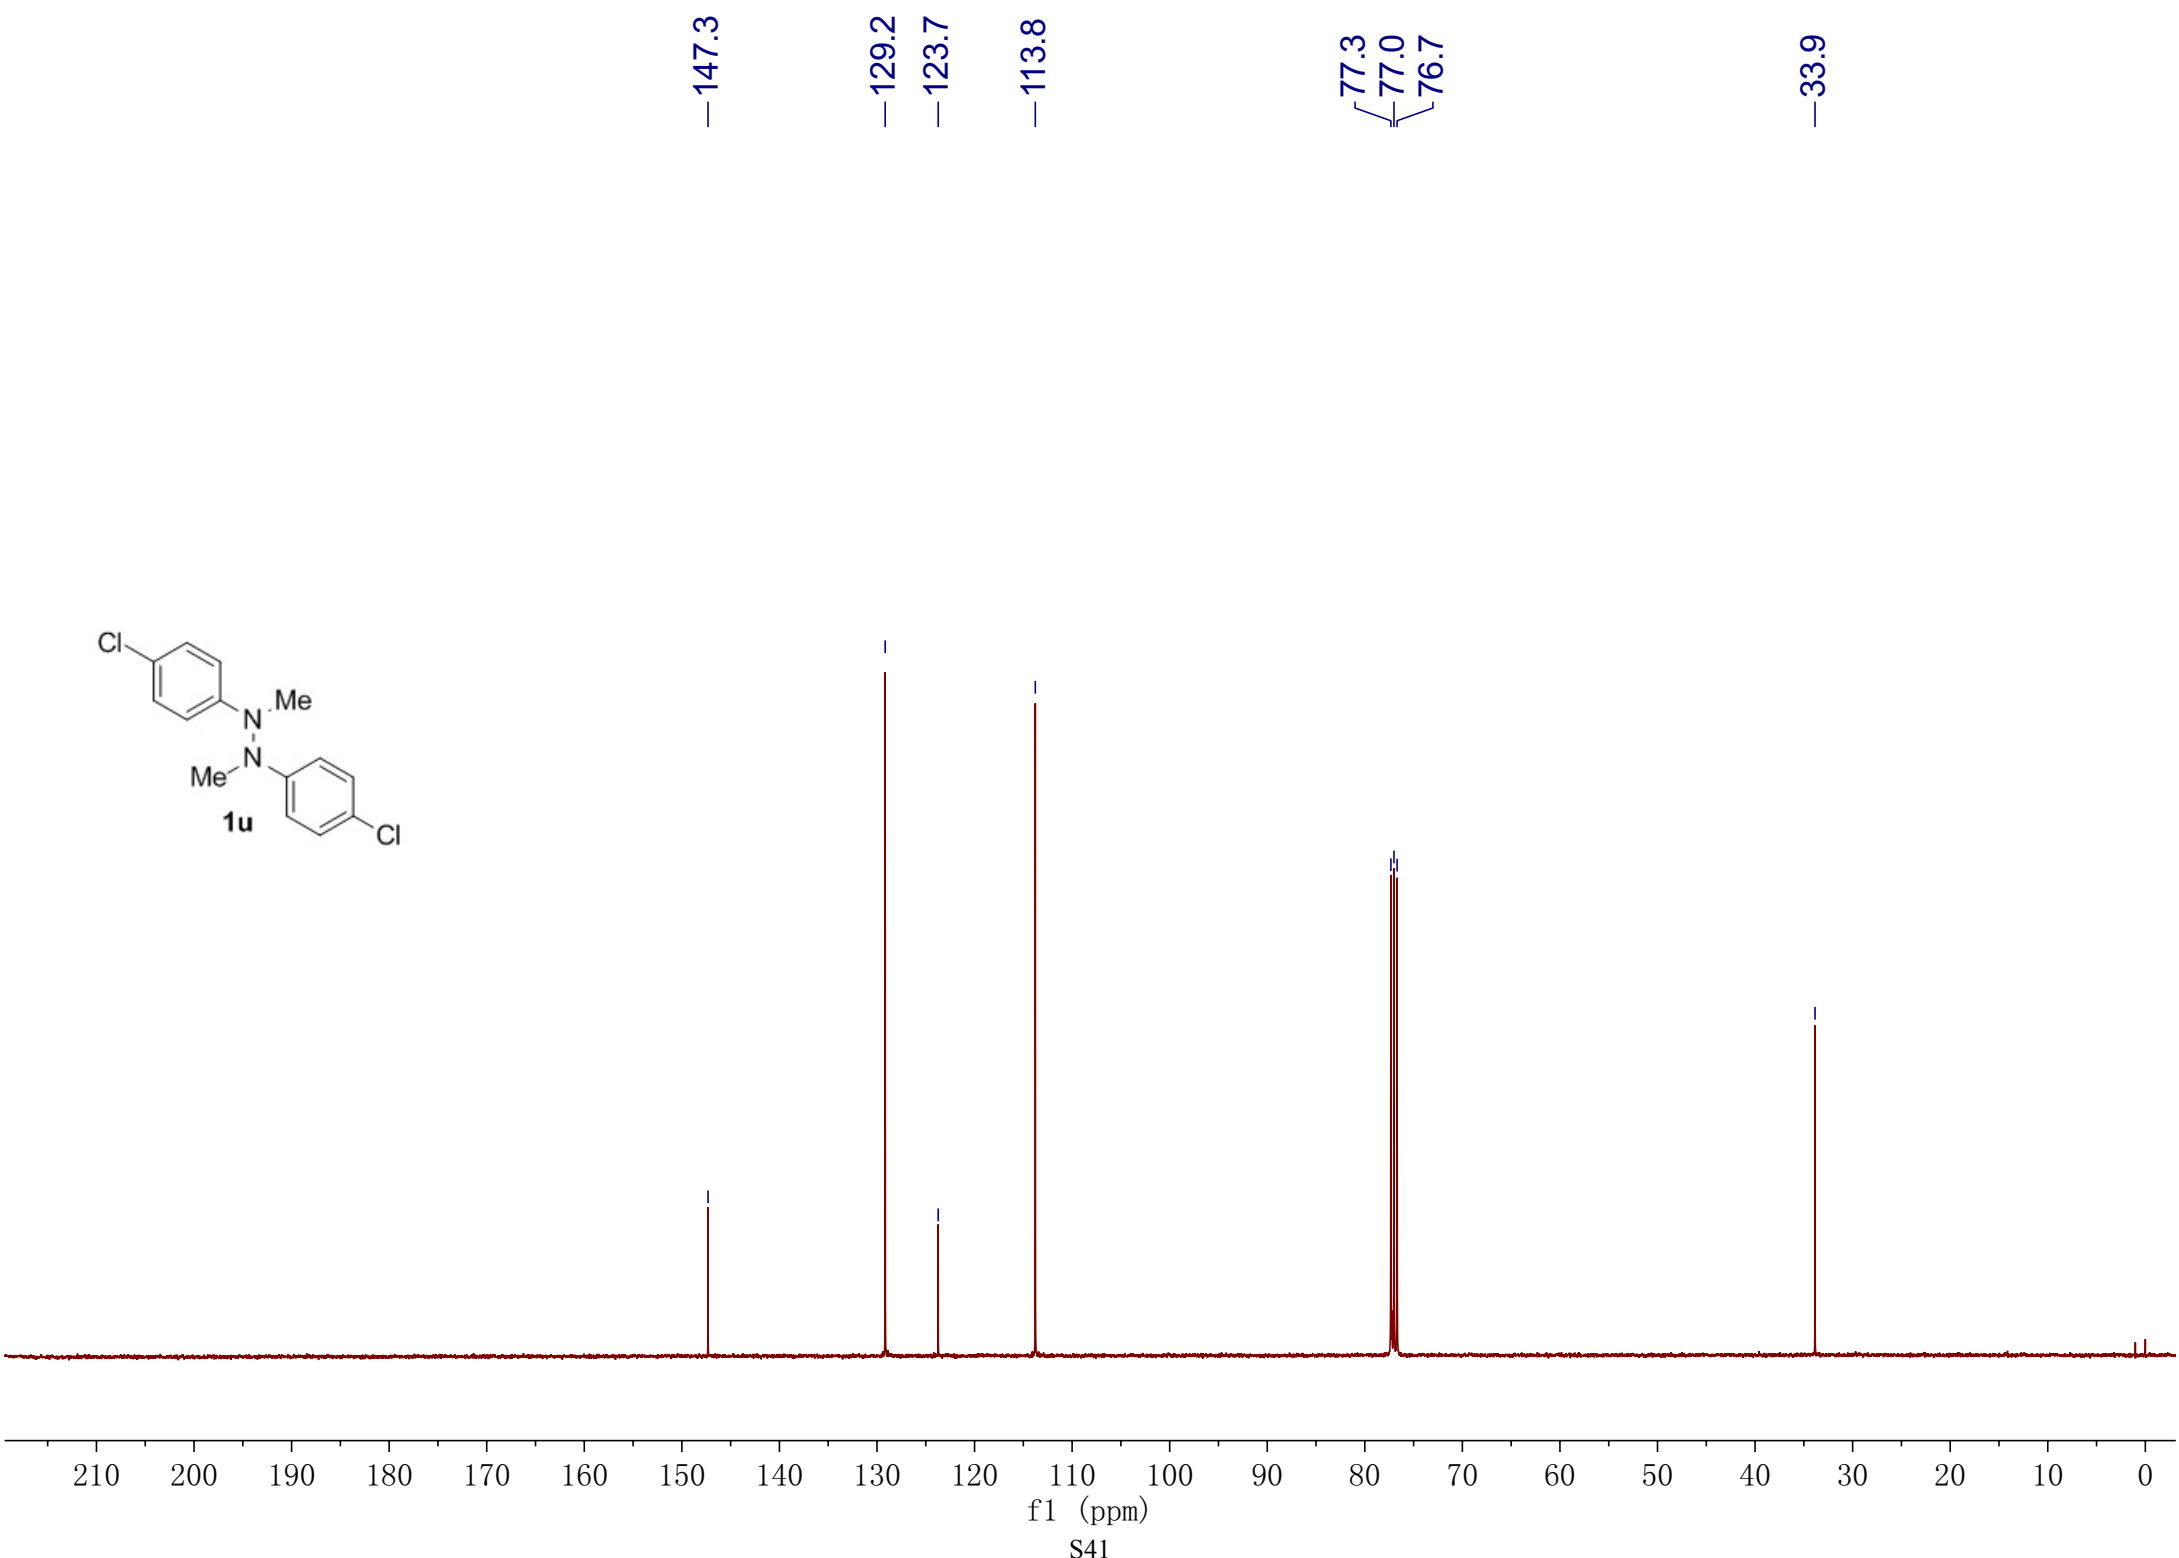

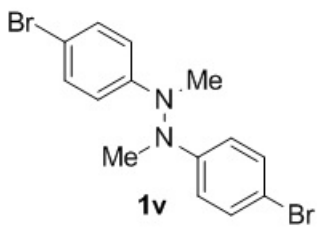

7.345  
7.337  
7.332  
7.320  
7.315  
7.307  
7.255  
6.708  
6.700  
6.695  
6.682  
6.677  
6.669

-2.947

-0.000

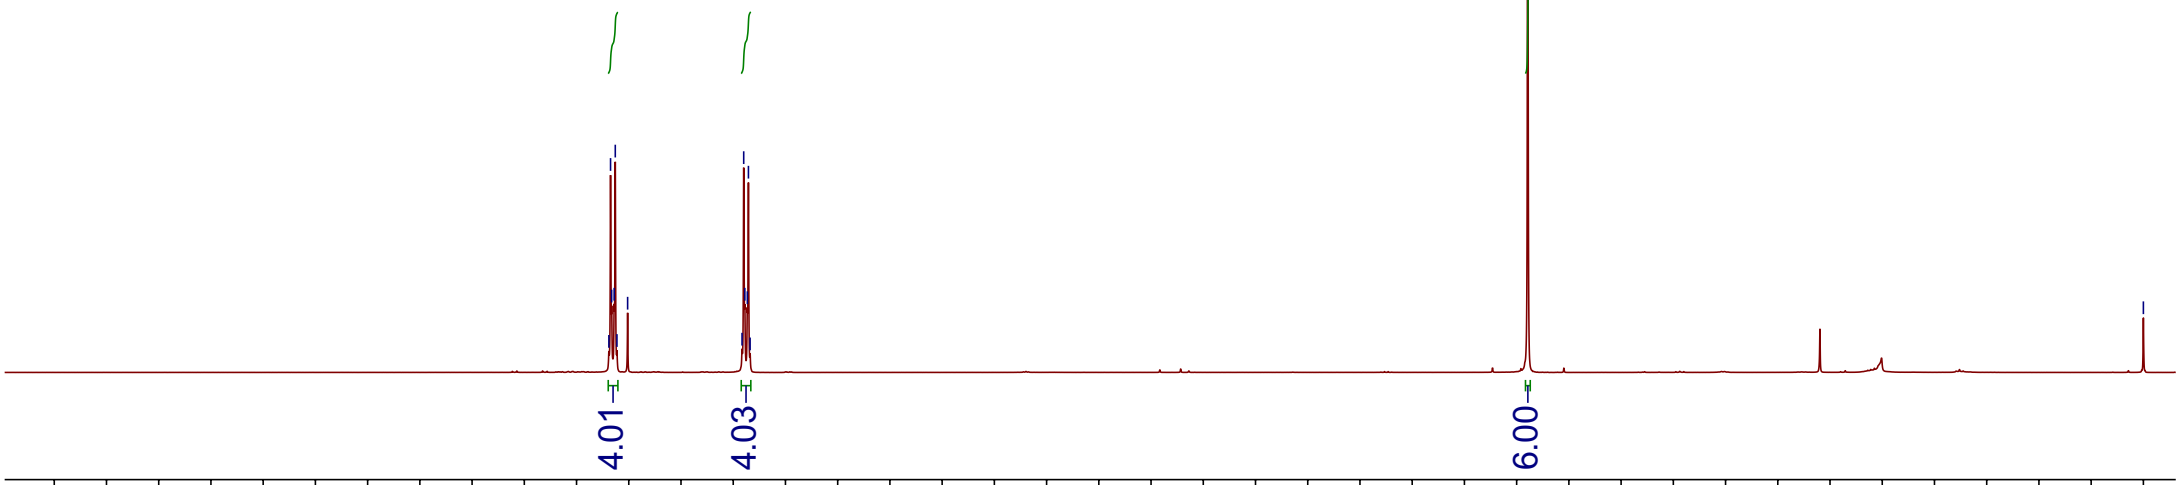

4.01

4.03

6.00

f1 (ppm)

S42

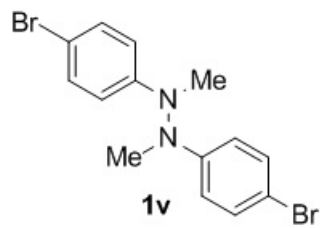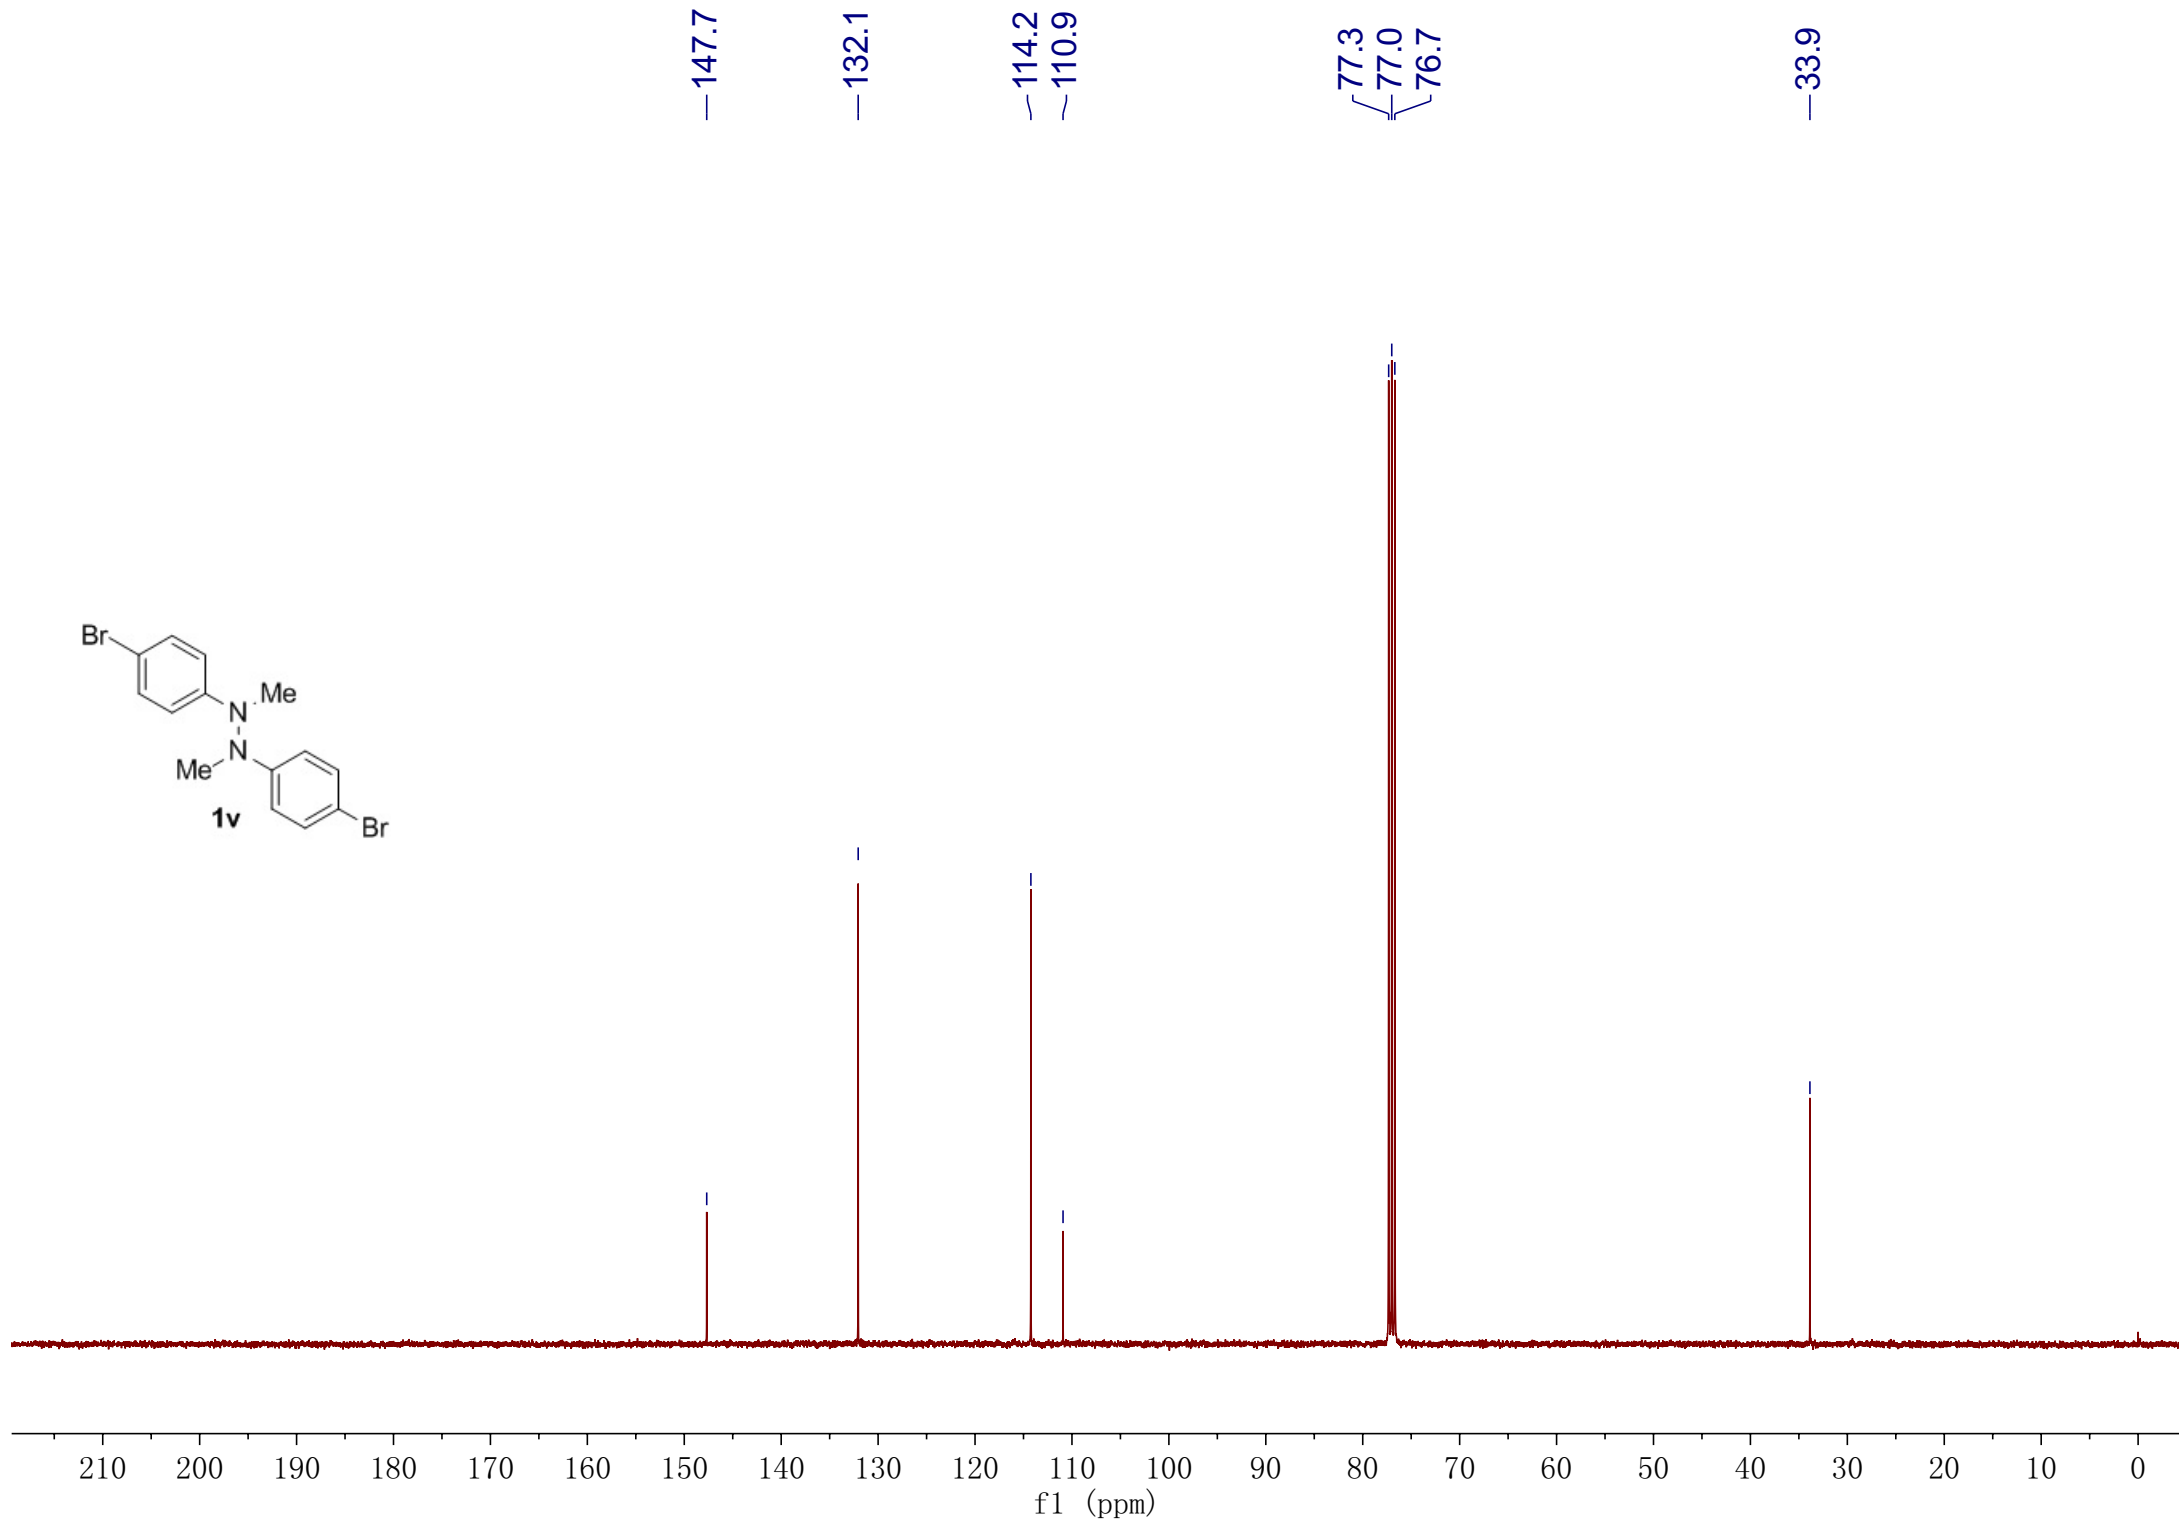

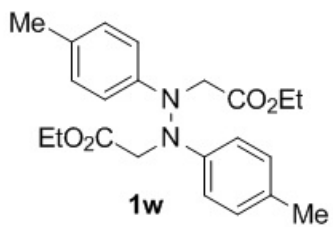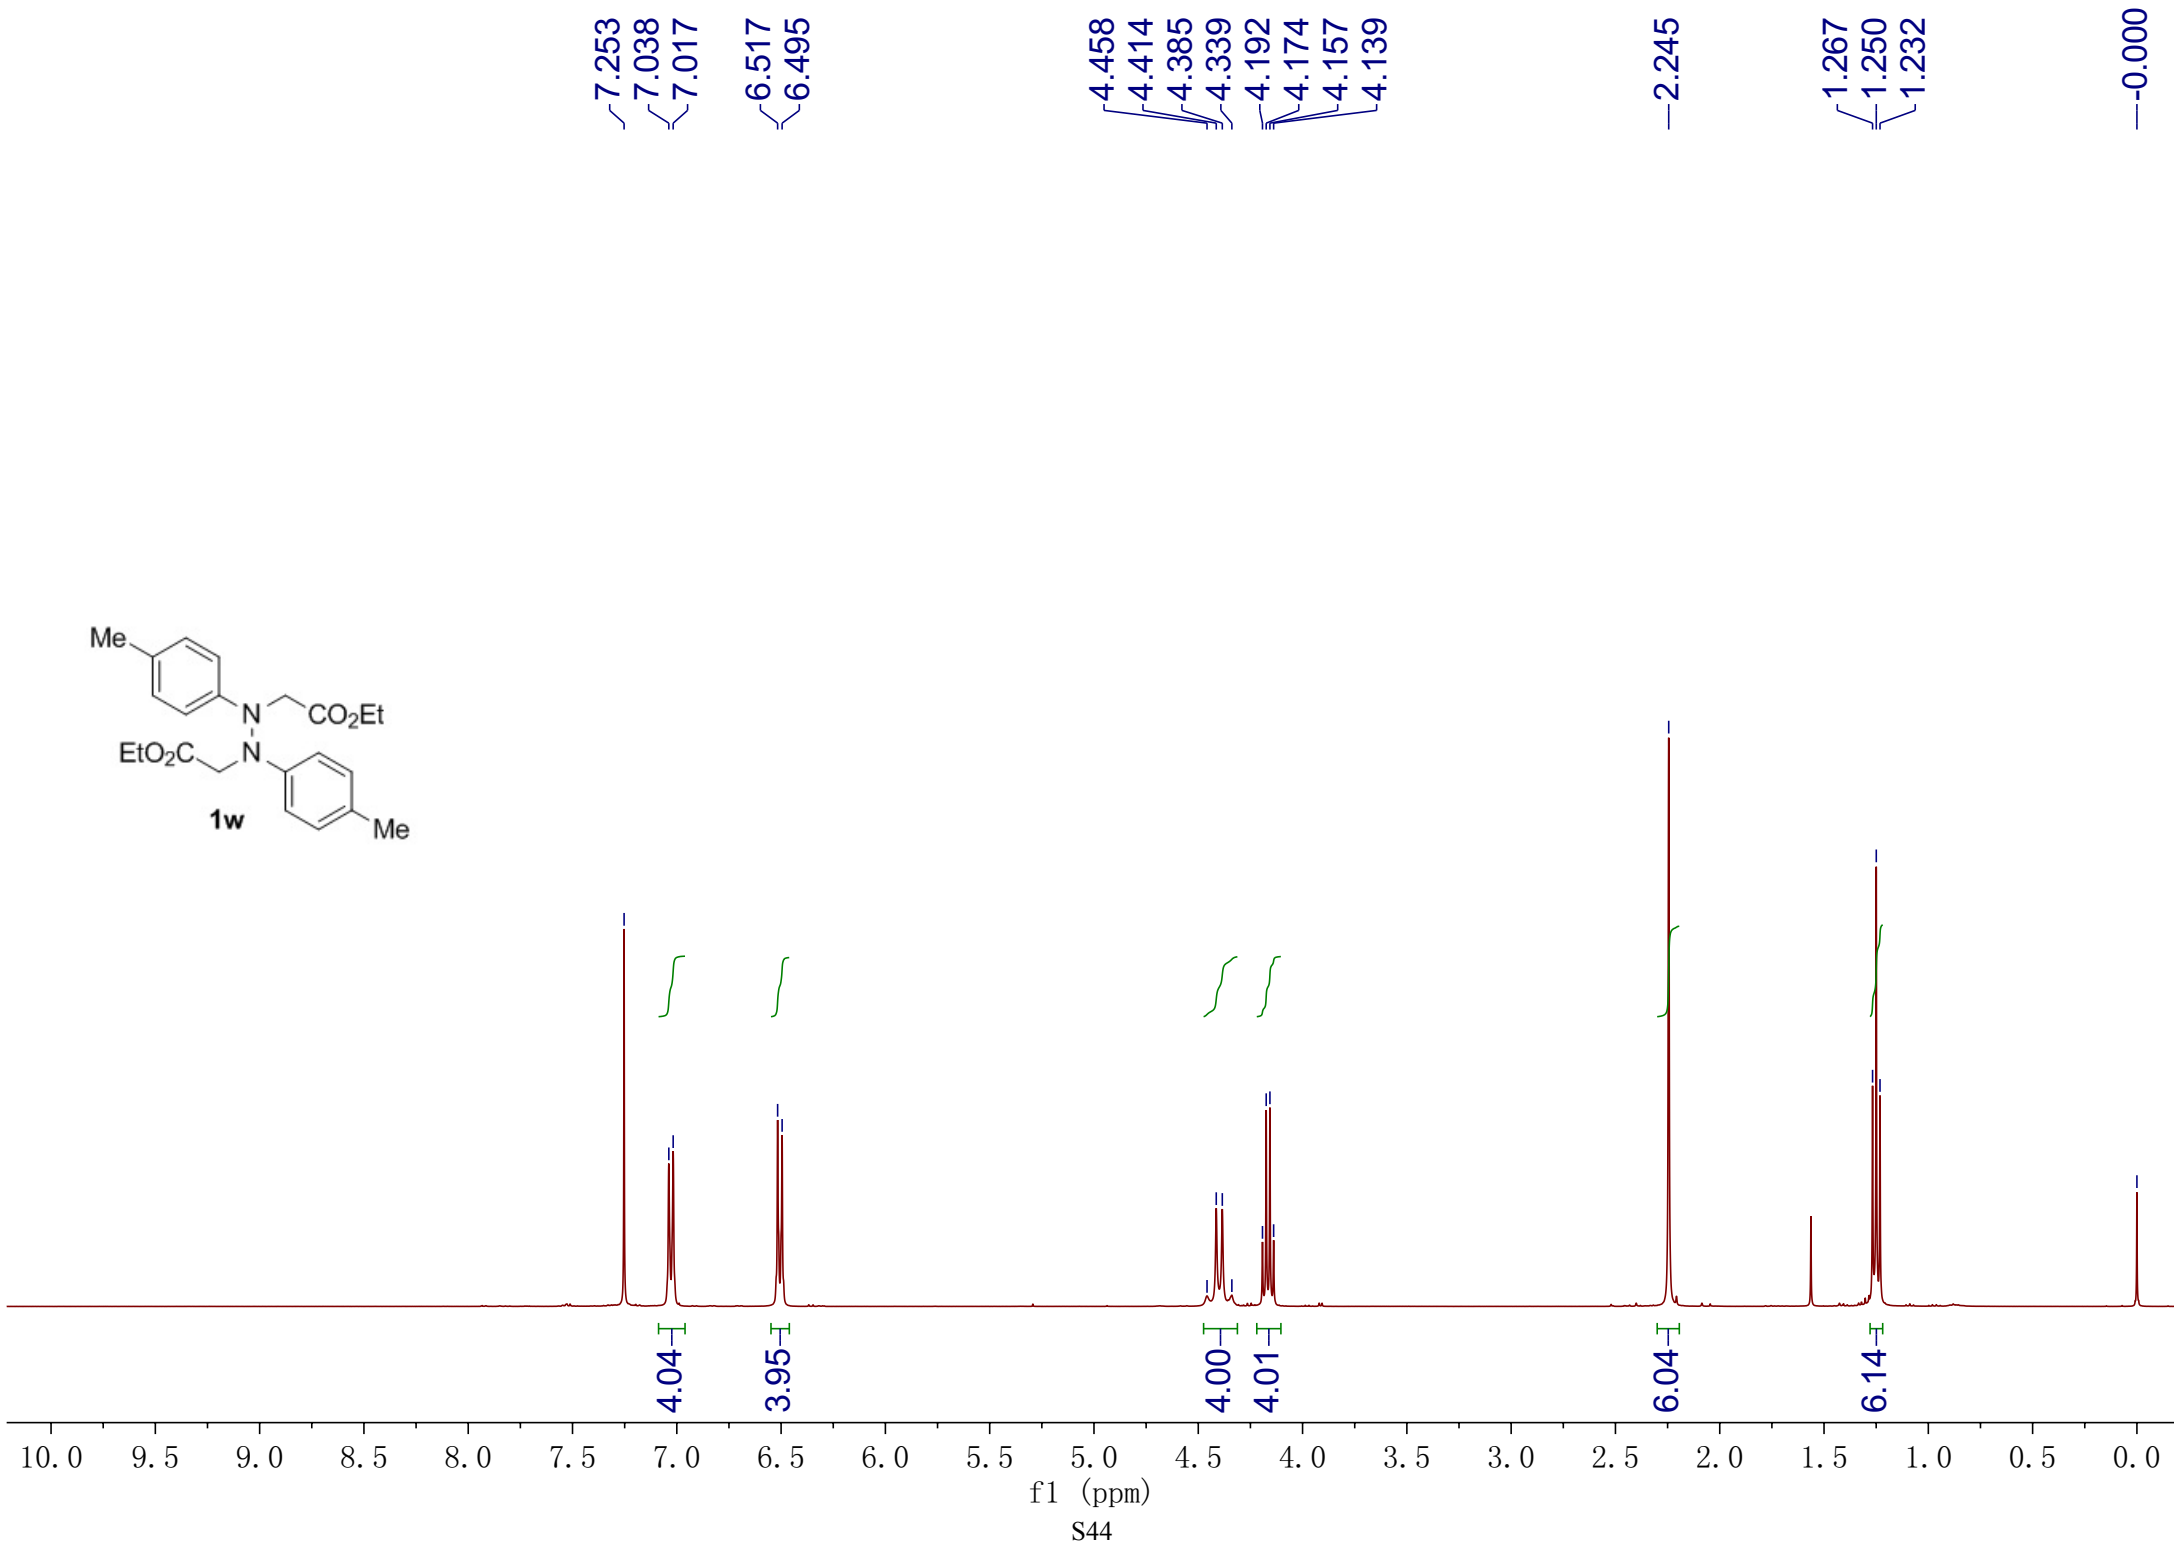

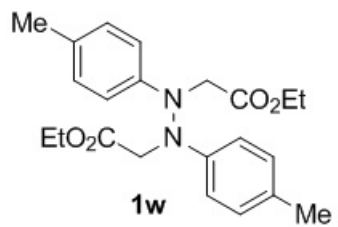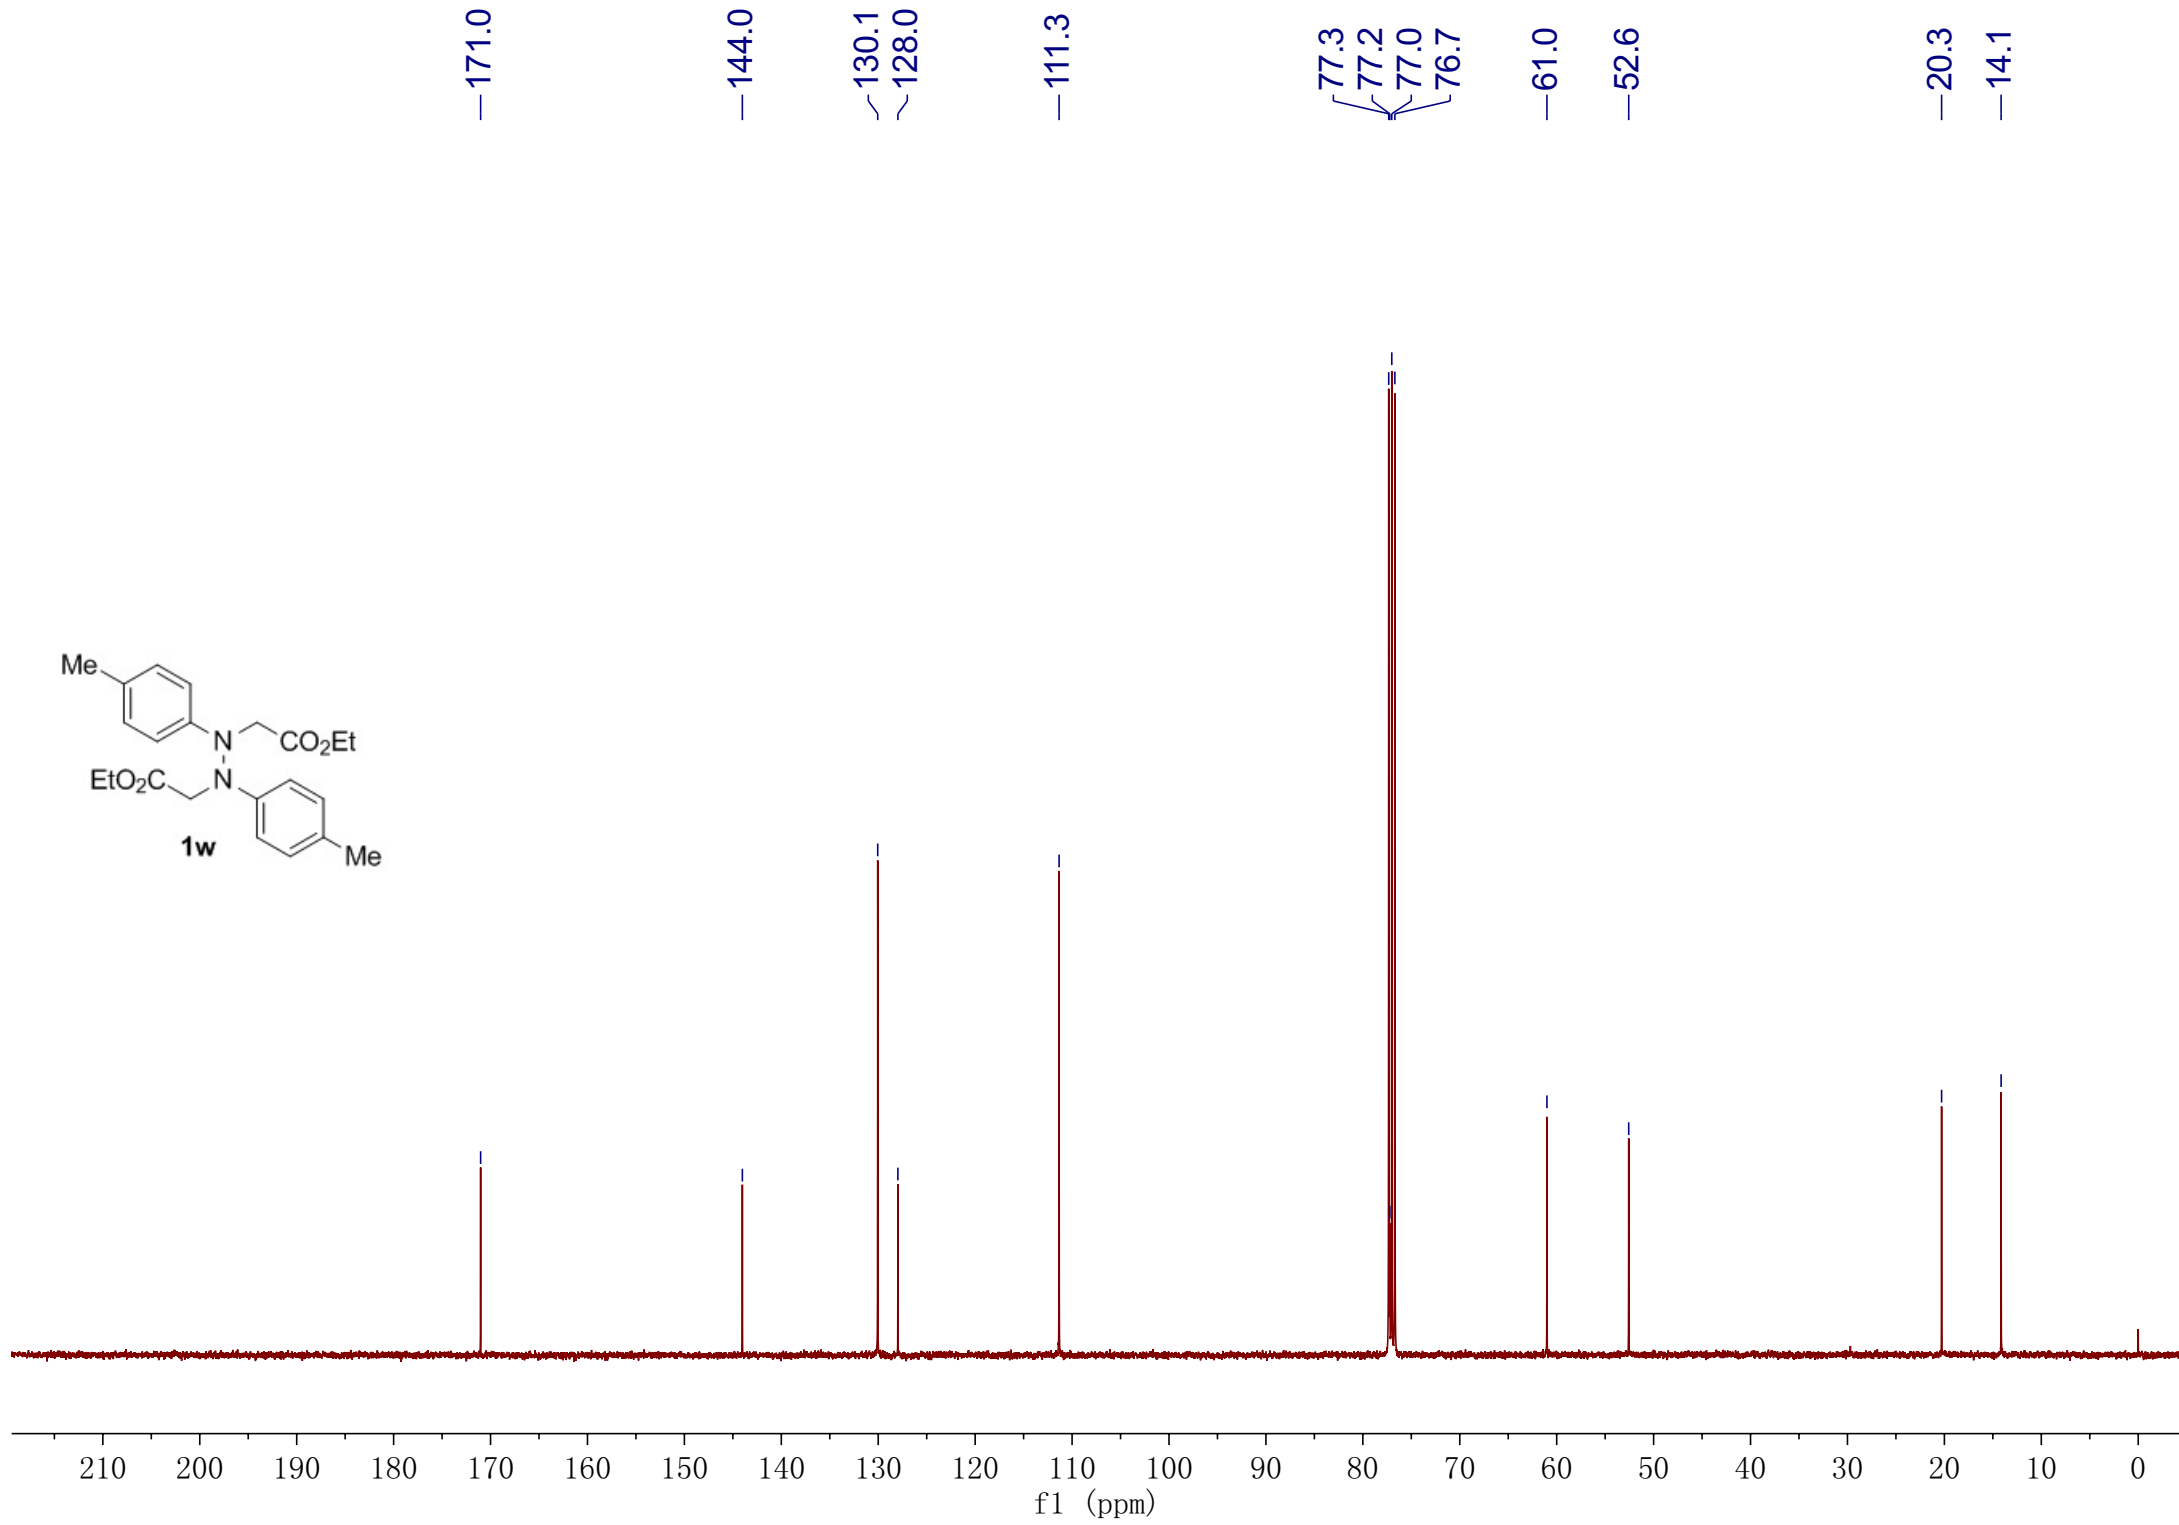

Supplement: c9ob00279k1.pdf [file c9ob00279k1.pdf]
